# Supplementary material for: Estimation of cost-based prices for injectable medicines in the WHO Essential Medicines List
Source: PubMed Central journal article supplement — BMJ Open. 2019 Sep 30;9(9):e027780. doi: 10.1136/bmjopen-2018-027780 (PMC6773329; doi:10.1136/bmjopen-2018-027780), 2019-09-30
Supplement: bmjopen-2018-027780.draft_revisions.pdf [file bmjopen-2018-027780.draft_revisions.pdf]

# BMJ Open

BMJ Open is committed to open peer review. As part of this commitment we make the peer review history of every article we publish publicly available.

When an article is published we post the peer reviewers' comments and the authors' responses online. We also post the versions of the paper that were used during peer review. These are the versions that the peer review comments apply to.

The versions of the paper that follow are the versions that were submitted during the peer review process. They are not the versions of record or the final published versions. They should not be cited or distributed as the published version of this manuscript.

BMJ Open is an open access journal and the full, final, typeset and author-corrected version of record of the manuscript is available on our site with no access controls, subscription charges or pay-per-view fees (<http://bmjopen.bmj.com>).

If you have any questions on BMJ Open's open peer review process please email [info.bmjopen@bmj.com](mailto:info.bmjopen@bmj.com)

# BMJ Open

## Estimated cost-based prices for injectable medicines in the WHO Essential Medicines List

|                               |                                                                                                                                                            |
|-------------------------------|------------------------------------------------------------------------------------------------------------------------------------------------------------|
| Journal:                      | <i>BMJ Open</i>                                                                                                                                            |
| Manuscript ID                 | bmjopen-2018-027780                                                                                                                                        |
| Article Type:                 | Research                                                                                                                                                   |
| Date Submitted by the Author: | 07-Nov-2018                                                                                                                                                |
| Complete List of Authors:     | Gotham, Dzintars; Independent, Barber, Melissa; Harvard University, Harvard T.H. Chan School of Public Health<br>Hill, Andrew; University of Liverpool, UK |
| Keywords:                     | PUBLIC HEALTH, pharmaceuticals, access to medicines, access to healthcare, global health, generic medicines                                                |
|                               |                                                                                                                                                            |

SCHOLARONE™  
Manuscripts

## Estimated cost-based prices for injectable medicines in the WHO Essential Medicines List

**Authors:** Dzintars Gotham MBBS<sup>1</sup>, Melissa Barber MPhil<sup>2</sup>, Andrew M Hill PhD<sup>3</sup>

1. Independent, Boston, MA, USA

2. Department of Translational Medicine, University of Liverpool, UK

3. Harvard T.H. Chan School of Public Health, Harvard University, Boston, MA, USA

### Addresses of authors

Dr Dzintars Gotham MBBS BSc(Hons)  
Independent  
Boston, Massachusetts, USA  
Email: dzintarsgotham@gmail.com  
Telephone: +1-781-975-2727

Melissa J Barber MPhil  
Harvard T.H. Chan School of Public Health  
Boston, Massachusetts, USA

Dr Andrew M Hill PhD  
Department of Translational Medicine,  
University of Liverpool,  
70 Pembroke Place, Liverpool L69 3GF, United Kingdom

### Corresponding author:

Dr Dzintars Gotham MBBS BSc(Hons)  
Independent  
Boston, Massachusetts, USA  
Email: dzintarsgotham@gmail.com  
Telephone: +1-781-975-2727

**Word count:** main text 2814, abstract 277

**Key words:** essential medicines; generics; cost of production; health economics; health systems

## ABSTRACT

### objectives

Challenges remain in ensuring universal access to affordable essential medicines. We previously estimated the expected generic prices based on cost of production for medicines in solid oral formulations (i.e. capsules or tablets) on the World Health Organization Model List of Essential Medicines (EML). The objectives of this analysis were to estimate cost-based prices for injectable medicines on the EML and to compare these to lowest current prices in the UK, South Africa, and India.

### design

Data on the cost of active pharmaceutical ingredients (API) exported from India were extracted from an online database of customs declarations ([www.infodriveindia.com](http://www.infodriveindia.com)). A formula was designed to use API price data to estimate a cost-based price, by adding the costs of converting API to a finished pharmaceutical product, including the cost of formulation in vials or ampoules, transportation, taxes, and an average profit margin.

### results

For injectable formulations on the WHO EML, medicines had prices above the estimated cost-based price in 75% of comparisons in the UK (median ratio 2.45), and 65% in South Africa (median ratio 1.47), while 83% of medicines in India were below estimated cost-based price (median ratio 0.29). 19% of injectable medicines in the UK, 12% in South Africa, and 5% in India had prices more than 10 times the estimated cost-based price. Medicines that appeared in the top 20 by ratio of lowest current price to estimated cost-based price for more than one country included numerous oncology medicines – irinotecan, leuprorelin, ifosfamide, daunorubicin, filgrastim, and mesna – as well as linezolid and ciclosporin.

### conclusions

Estimating manufacturing costs can identify cases in which profit margins for medicines may be set significantly higher than average.

### setting/participants/interventions/outcome measures/trial registration

Not applicable.

### Strengths and limitations of this study

- The cost assumptions used to estimate cost-based prices were conservative
- The key input of API price was based on average prices of actual, completed sales of API
- Apart from the individual API price data, the costing formula was adjusted only for formulation as vial or ampoule, but not for other characteristics such as volume
- We did not estimate demand volumes and did not adjust price estimates based on demand volume

For peer review only

## INTRODUCTION

There are persistent challenges in ensuring access to affordable essential medicines in low-and middle-income countries (LMICs).[1] The World Health Organization's Model List of Essential Medicines (EML) comprises medicines that meet the priority health needs of global populations and should be available at all times, at affordable prices.[2] A previous analysis estimated the cost of production for solid oral formulations in the EML, finding sizeable differences between cost of manufacture and current prices in the UK, South Africa, and India.[3]

A number of differences between solid oral formulations and injectable formulations could be expected to affect manufacturing costs, such significantly higher requirements for manufacturing sites to maintain product sterility for intravenous and intramuscular formulations, cost of containers like ampoules or metered-dose inhaler canisters, and different costs of excipients. Other factors may influence market dynamics for individual products – for example, the majority of injectable products are likely, in general, to be used in healthcare institutions and for more severe illness than most other formulations.

While many cases of difficulties in accessing treatment are associated with patent-protected medicines, in some cases, generic medicines may also be priced at very high levels, such as in the recent cases involving manufacturers Pfizer, Flynn, and Aspen in the UK. In these cases, manufacturers dramatically increased prices of generic medicines, arguably taking advantage of a dominant position they held in the respective markets.[4,5]

We aimed to develop an algorithm for estimating the cost of manufacture for injectable medicines on the WHO EML, to use this algorithm to estimate prices that would be expected assuming an average profit margin, and to compare these estimated cost-based prices to current prices in the UK, South Africa, and India.

## METHODS

In our earlier analysis of solid oral formulations (SOF), we developed a costing formula that accounted for capital expenses, the cost of excipients, and the cost of formulation into tablets.[3] We have also previously developed a costing formula for biosimilars of insulin formulated in vials.[6]

Here, we developed a similar formula for injectable medicines, and submitted data on the cost of active pharmaceutical ingredients (API) to the formula to generate cost-based estimated generic prices. We then compared these estimated prices to current market prices in three countries – the UK, South Africa, and India.

### medicines included in the analysis

We analysed medicines listed in the 2015 WHO EML as injectable formulations.[7] We use the term ‘item’ to describe an individual medicine-formulation-dosage listing. Besides SOF, we further excluded certain categories of medicines, due both to limitations in reliably identifying API data and/or were we considered that the market would be a special case (e.g. blood products). These categories included blood products, diagnostic agents, antivenom, vaccines, simple water-based solutions (e.g. 0.9% sodium chloride), and vitamins and minerals. A full list of included and excluded medicines/formulations is available in the appendix.

### cost of API

Data on API exported from India were retrieved from an online database of customs declarations ([www.infodriveindia.com](http://www.infodriveindia.com)), a source that we have used in numerous previous analyses of manufacturing costs.[3,6,8–12] API shipments in the date range 1 July 2014 to 1 July 2016 were included, extending the range 2 years into the past if <100 records were returned, and repeating this until at least 100 records were available, or until the timeframe spanned 6 years.

API data were manually cleaned to remove entries that did not represent genuine API (e.g. shipments of FPP; see appendix for details), after which a linear regression model, weighted by size in kilograms of individual shipments, was applied to estimate an average API price per kilogram at the data cut-off date (November 2016)(see appendix for an example).

1  
2  
3 For some medicines, dosage is expressed as the dose of the active molecule, while the API is sold as  
4 a salt form (e.g. one vial of '80mg methylprednisolone' contains 106mg of methylprednisolone  
5 sodium succinate). We adjusted the cost of API needed per unit accordingly.  
6  
7  
8  
9

10 Statistical analyses of API export data were done in Stata/IC V.14.0 for Mac.  
11  
12

### 13 **cost of manufacture of injectables**

14  
15  
16

17 We have previously estimated cost-based prices that could be achieved in a competitive market for  
18 various SOF medicines,[3,8–12] as well as for insulins.[6] We divide the manufacturing cost  
19 estimation into four parts: the cost of API, the cost of converting the API into an finished  
20 pharmaceutical product (FPP), and operating expenditures including a profit margin. The cost  
21 estimation formula is given in Figure 1 and explained further below.  
22  
23  
24  
25  
26

27 The cost of API per dose was calculated as described earlier.  
28  
29

30 The cost of converting API into an FPP includes the cost of constructing and operating manufacture  
31 sites, raw materials such as glass vials, and process wastage (i.e. the proportion of the API that is  
32 wasted in the process of formulating it into an FPP). In general, we aimed to use conservative (high)  
33 assumptions in estimating the cost of production.  
34  
35  
36  
37

38 Injectable items in the EML divide broadly into those for which the designated formulation is an  
39 ampoule, and those for which the designated formulation is a vial. In some cases, the EML does not  
40 indicate whether formulation is as a vial or ampoule – for these items we assumed one or the other  
41 based on the more prevalent form found across the UK, South Africa, and India.  
42  
43  
44  
45

46 To design conservative assumptions for ampoule/vial formulation costs, we reviewed the lowest-  
47 priced products formulated as vials or ampoules in the UK eMIT database (see next section). These  
48 lowest prices are around US\$0.20 for ampoules and US\$0.50 for vials (appendix). We used these  
49 values as assumed formulation costs. These are of course conservative assumptions, as for those  
50 products API costs and operating margins (and transportation costs, taxes, etc.) would have to be  
51 zero for the price to represent formulation alone. This is reflected in a recent analysis of the cost of  
52 manufacture of vaccines, which estimated the cost of sterile formulation as an ampoule to be  
53 around \$0.12/unit, and as a vial to be around US\$0.35/unit, with these values including raw  
54  
55  
56  
57  
58  
59  
60



1  
2  
3 materials (i.e. the vial or ampoule itself), labour, facility and equipment costs, and overheads.[13] It  
4 is worth noting that Indian government standards on pharmaceutical manufacturing costs,  
5 previously used to inform price ceilings, set allowable costs at a substantially lower level: ampoule  
6 costs at \$0.03-0.13 and vial costs at \$0.05-0.21 (ranges depending on size and type)(appendix).  
7  
8  
9

10  
11 We assumed that 10% more API is needed than the stated dosage, to account for loss of API in the  
12 vial/ampoule filling process and vial/ampoule overfill.  
13  
14

15  
16 We assumed a net profit margin of 10% (the average operating margin in the US was 12% in  
17 2013).[14]  
18  
19

20  
21 Though these cost components are highly variable between countries, an analysis by IMS Health  
22 found that costs associated with import (transport, tariffs, other charges) were around 5% in most of  
23 the countries surveyed (e.g. Brazil, India, Russia), and that taxes represented around 10% of the  
24 final price.[15] We therefore added a 10% margin for transportation costs, and 10% margin to  
25 account for taxation.  
26  
27  
28  
29

### 30 31 **prices in the UK, South Africa, and India**

  
32

33  
34  
35 Prices were collected in December 2016.  
36  
37

38  
39 For the UK, prices were collected from the British National Formulary (BNF) and the electronic  
40 market information tool (eMit). The BNF lists 'indicative prices' and is a reference used by clinicians  
41 and pharmacists. eMit provides actual government-purchase prices. The lowest price available  
42 across the two sources was used. For South Africa, prices were collected from a database of prices in  
43 the public healthcare system as well as a database of prices in the private market, both published by  
44 the Department of Health. The lowest price available across the two sources was used. For India,  
45 prices reported in public tenders of the state of Tamil Nadu were used. Where prices were not  
46 available in this source, we used the price reported in an online database of Indian Maximum Retail  
47 Prices. Details on price sources are available in the appendix.  
48  
49  
50  
51  
52

53  
54  
55 For many medicines in the EML, multiple dosages are listed, and may be interchangeable by using a  
56 larger number of smaller-dose items in the place of a larger item, or vice-versa. Individual countries  
57 may procure larger some volumes of one dosage, but not the other, potentially leading to one  
58  
59  
60

1  
2  
3 dosage having a far higher price than would be expected, due to lower demand volume. To avoid  
4 misleading findings as a result of this, for each formulation of each medicine, comparisons between  
5 countries and between market prices and cost-based price estimates (for injectables) or API cost (for  
6 other formulations) were made for the dosage that gave the lowest difference. As an example, for  
7 an injection that is listed in 500mg and 1000mg forms, the UK-South Africa price ratio was recorded  
8 as the lower between the two dosage forms. Within the context of our analysis this is a conservative  
9 approach (yielding smaller differences in comparisons).  
10  
11  
12  
13  
14  
15  
16  
17  
18  
19  
20  
21  
22  
23  
24  
25  
26  
27  
28  
29  
30  
31  
32  
33  
34  
35  
36  
37  
38  
39  
40  
41  
42  
43  
44  
45  
46  
47  
48  
49  
50  
51  
52  
53  
54  
55  
56  
57  
58  
59  
60

For peer review only

## RESULTS

Of 414 unique medicines (including combinations) on the 2015 EML, 149 fit the inclusion criteria of this analysis. API data were available for 98 of these 149 medicines (66%).

### estimated cost-based prices

Estimated cost-based prices ranged from \$0.26 (enoxaparin 20mg) to \$494 (rituximab 500mg).

The comparison of lowest current prices in the UK, South Africa, and India to estimated cost-based prices for injectable items is shown in Table 1 and Figure 2. The majority of injectable items had prices significantly above the estimated cost-based prices in the UK and South Africa, however, in India, 83% of injectable items had prices below the estimated cost-based price.

The 20 items with the highest ratios of lowest current price to estimated cost-based price are shown for the UK in Table 2, for South Africa in Table 3, and for India in Table 4.

Therapeutic categories with notably higher ratios of lowest current price to estimated cost-based price included cardiovascular medicines, medicines for mental and behavioural disorders, and medicines affecting the blood (appendix).

### International price comparisons

International comparisons of lowest current prices for injectable essential medicines are shown in Figure 3. Prices were higher in the UK than in South Africa in 57% of comparisons, with a median ratio of 1.26; higher in the UK than in India in 90% of comparisons, with a median ratio of 6.75; and higher in South Africa than in India in 86% of comparisons, with a median ratio of 4.13 (Figure 3).

## DISCUSSION

For injectable formulations on the WHO EML, 75% of medicines had prices above the estimated cost-based price in the UK, and 65% has prices above the estimated cost-based price in South Africa, while 83% of medicines in India were below estimated cost-based price. 19% of injectable medicines in the UK, 12% in South Africa, and 5% in India had prices more than 10 times the estimated cost-based price (Table 1, Figure 2).

A few medicines were notable for appearing in the top-20 lists by ratio of current price to estimated cost-based price in more than one country (Tables 2–4): numerous oncology medicines – irinotecan, leuprorelin, ifosfamide, daunorubicin, filgrastim, and mesna – as well as the linezolid, an antibiotic, and ciclosporin, an immunosuppressant.

A wide range of market factors may contribute to the greater than average difference in manufacture costs and price. The ‘top 20’ injectable medicines are all mostly used in the in-patient hospital setting, are used in specialist treatments, are second/third-line treatments, and/or are used for short durations. These characteristics would all tend to reduce demand volumes, reduce economies of scale (both in manufacture and distribution), and reduce the buyer’s negotiating power, and may thus explain the high prices relative to manufacture costs. The great majority of medicines compared in this analysis are no longer under patent protection in the UK, South Africa, or India.[16]

Given the range of medicines included, it is difficult to make generalised comments. If cost of manufacture analysis were employed by governments to evaluate prices, large differences between current prices and estimated cost-based prices could trigger closer examination on a case-by-case basis. For example, linezolid is recently off-patent, and is used as a ‘last-resort’ antibiotic,[17] limiting demand volume. Enoxaparin and insulin, which appear in the ‘top 20’ list for India (Table 4), are biologics, meaning different regulations and higher regulatory expenses may apply. In such cases, large profit margins may be more acceptable. In other cases, such as ibuprofen (5mg in 1mL injection) and ampicillin (1000mg powder for injection) in the UK may reflect insufficient competition, inefficient procurement, or a less commonly used dosage form (Table 2). Some of these ‘top 20’ medicines may represent a substantial burden on healthcare expenditures – for example, irinotecan represented expenditures of £22 million (about US\$29 million) by the UK public healthcare system in 2016/2017.[18]

1  
2  
3  
4  
5  
6  
7 Current lowest prices in India were on average lower than our estimated cost-based prices (lowest  
8 current prices in India were median 29% of the estimated cost-based price; Table 1 and Figure 2).  
9  
10 This may reflect conservative assumptions made for the cost of ampoules and vials; a substantial  
11 number of items cost less than our assumed raw material cost for the ampoule/vial (primary  
12 packaging) alone, which we based on prices in high-income countries (see Figure A2 in the  
13 Appendix). It may also reflect the general conservative (overestimating) effect of using data on  
14 exported API; API that is manufactured in-house or procured domestically may have lower prices.  
15  
16 The use of an average API price (rather than, for example, lowest observed or first-quartile) means,  
17 in most cases, that a number of API sales occurred at lower price points. Lastly, Indian prices were  
18 collected from two databases – one representing the private market and one representing Tamil  
19 Nadu state tenders (the lower price of the two was recorded). State tender prices are likely lower  
20 than private market prices, but the majority of health expenditures in India are out-of-pocket, and of  
21 these the majority are on medicines.[19]  
22  
23  
24  
25  
26  
27  
28  
29

30 In our earlier analysis of solid oral form medicines in the EML, we found that 214 of 277 comparable  
31 prices in the UK, 142 of 212 comparable prices in South Africa and 118 of 298 comparable prices in  
32 India were above the estimated cost-based price. Median ratios for lowest current price to  
33 estimated cost-base price were 2.7x in the UK, 1.4x in South Africa, and 0.6x in India.[3] These ratios  
34 are notably similar to the comparisons in this analysis between lowest current prices and estimated  
35 cost-based prices for injectables (2.5x in the UK, 1.5x in South Africa, 0.3x in India; Table 1).  
36  
37  
38  
39  
40  
41

42 Analysis of the cost of production of medicines can be used in government price negotiations, price  
43 control mechanisms, or in competition law contexts. In India, until 2013, a formula based on the cost  
44 of manufacture was used to set ceiling prices on key medicines.[20,21] A similar approach is or has  
45 been used in Bangladesh, Pakistan, and China.[21] In South African tenders, manufacturers are  
46 required to submit breakdowns of their price by various cost components including API cost and  
47 profit margin.[22] The WHO Guideline on Pharmaceutical Pricing Policies notes that the use of cost-  
48 plus formulae may be challenging to implement due to challenges on obtaining accurate data on  
49 material prices on manufacturing costs, and due to the potential for manipulation of data by  
50 manufacturers to exaggerate costs and justify higher prices.[21] Indeed, in this analysis, the Indian  
51 government requirement for the publication of customs data on the value of exported API has been  
52 revoked since we collected data, meaning that at present the authors are not aware of an  
53  
54  
55  
56  
57  
58  
59  
60

1  
2  
3 alternative, affordable source of data for API costs.[23] Nevertheless, cost of manufacture analysis  
4 should be explored further as a component of pricing policies.  
5  
6  
7

8 Pricing policies linked to manufacturer costs would also need to be use alongside policies to prevent  
9 shortages and stock-outs.[24] Indeed, some of the therapeutic groups identified in this analysis as in  
10 many cases high differences between market prices and estimated cost-based prices, such as  
11 chemotherapy medicines and antibiotics, may also be groups that are vulnerable to  
12 shortages.[25,26]  
13  
14  
15  
16  
17

### 18 **limitations**

19  
20  
21 The main limitation of our analysis is that our estimates do not account for differences of costs  
22 individual manufacturing plants, different distribution costs (including tariffs) depending on the  
23 country of manufacture and the importing country, and changes in conversion cost depending on  
24 the volume of the unit. As argued above, this limitation would not preclude the use of a  
25 methodology such as this one to identify medicines that may have high profit margins, for closer *ad*  
26 *hoc* analysis.  
27  
28  
29  
30  
31  
32

33 As data collection for this analysis finished shortly before the publication in April 2017 of the 2017  
34 EML, we use the second most recent iteration, the 2015 EML.  
35  
36  
37

### 38 **conclusion**

39  
40  
41 Most injectable medicines on the EML can be manufactured at very low cost. In the UK, about one in  
42 five injectable essential medicines is priced at more than 10 times the estimated cost-based price. In  
43 South Africa, this proportion is one in ten, and in India, one in twenty. Estimation of the cost of  
44 manufacture could be used in government pharmaceutical pricing mechanisms, for example, by  
45 identifying products for which profit margins may be notably above average.  
46  
47  
48  
49  
50  
51  
52  
53  
54  
55  
56  
57  
58  
59  
60

## ACKNOWLEDGMENTS

None.

## FUNDING

No specific funding was received for this analysis.

## AUTHORS' CONTRIBUTIONS

All authors designed the study, interpreted the data, and critically reviewed the manuscript. MB and DG collected and analysed the data.

## COMPETING INTERESTS

Dzintars Gotham reports personal fees for unrelated work from the Medicines Patent Pool, the Wellcome Trust, Treatment Action Group, and the World Health Organization. Melissa J Barber and Andrew M Hill report no conflicts of interest.

## DATA SHARING STATEMENT

An appendix with details on methodology is available as a supplementary file.

## REFERENCES

- 1 Wirtz VJ, Hogerzeil HV, Gray AL, *et al*. Essential medicines for universal health coverage. *The Lancet* 2017;**389**:403–76. doi:10.1016/S0140-6736(16)31599-9
- 2 World Health Organization. *Revised procedure for updating WHO's Model List of Essential Drugs*. 2001. <http://apps.who.int/medicinedocs/documents/s22165en/s22165en.pdf> (accessed 8 Mar 2018).
- 3 Hill A, Barber MJ, Gotham D. Estimated costs of production and potential prices for the WHO Essential Medicines List. *BMJ Glob Health* 2018;**0**:e000571. doi:10.1136/bmjgh-2017-000571
- 4 Billy Kenber. Drug firm is facing fine of £220m for hiking prices. *The Times*. 2017. <https://www.thetimes.co.uk/article/drug-firm-faces-fine-of-220m-for-hiking-prices-gf0ssclqk> (accessed 28 Oct 2018).
- 5 Competition and Markets Authority. CMA fines Pfizer and Flynn £90 million for drug price hike to NHS. <https://www.gov.uk/government/news/cma-fines-pfizer-and-flynn-90-million-for-drug-price-hike-to-nhs> (accessed 28 Oct 2018).
- 6 Gotham D, Barber MJ, Hill A. Production costs and potential prices for biosimilars of human insulin and insulin analogues. *BMJ Glob Health* 2018;**3**:e000850. doi:10.1136/bmjgh-2018-000850
- 7 World Health Organization. *19th WHO Model List of Essential Medicines*. 2015. [http://www.who.int/medicines/publications/essentialmedicines/EML2015\\_8-May-15.pdf?ua=1](http://www.who.int/medicines/publications/essentialmedicines/EML2015_8-May-15.pdf?ua=1) (accessed 28 Jan 2016).
- 8 Hill A, Gotham D, Cooke *et al*. G. Analysis of minimum target prices for production of entecavir to treat hepatitis B in high- and low-income countries. *J Virus Erad* 2015;**1**:103–10.
- 9 Hill A, Gotham D, Fortunak J, *et al*. Target prices for mass production of tyrosine kinase inhibitors for global cancer treatment. *BMJ Open* 2016;**6**:e009586. doi:10.1136/bmjopen-2015-009586
- 10 Hill A, Simmons B, Gotham D, *et al*. Rapid reductions in prices for generic sofosbuvir and daclatasvir to treat hepatitis C. *J Virus Erad* 2016;**2**:28–31.
- 11 Hill A, Redd C, Gotham D, *et al*. Estimated generic prices of cancer medicines deemed cost-ineffective in England: a cost estimation analysis. *BMJ Open* 2017;**7**:e011965. doi:10.1136/bmjopen-2016-011965
- 12 Gotham D, Fortunak J, Pozniak A, *et al*. Estimated generic prices for novel treatments for drug-resistant tuberculosis. *J Antimicrob Chemother* 2017;**;**:dkw522. doi:10.1093/jac/dkw522
- 13 Sedita J, Perrella S, Morio M, *et al*. Cost of goods sold and total cost of delivery for oral and parenteral vaccine packaging formats. *Vaccine* 2018;**36**:1700–9. doi:10.1016/j.vaccine.2018.01.011
- 14 Karamelic J, Ridic O, Ridic G, *et al*. Financial aspects and the future of the pharmaceutical industry in the United States of america. *Mater Socio-Medica* 2013;**25**:286–90. doi:10.5455/msm.2013.25.286-290



- 1
- 2
- 3
- 4 15 IMS Institute for Healthcare Informatics. Understanding the pharmaceutical value chain. 2014.  
5 [https://www.ifpma.org/wp-content/uploads/2016/02/IIHI\\_Report\\_Pharma\\_Value.pdf](https://www.ifpma.org/wp-content/uploads/2016/02/IIHI_Report_Pharma_Value.pdf)
- 6
- 7 16 Medicines Patent Pool. *MedsPaL*. <http://www.medspal.org/> (accessed 28 Feb 2018).
- 8
- 9 17 MSF Access campaign. *DR-TB drugs under the microscope: Sources and prices for drug-resistant*  
10 *tuberculosis medicines*. 2016. [http://www.msfaccess.org/sites/default/files/TB\\_report\\_\\_DR-](http://www.msfaccess.org/sites/default/files/TB_report__DR-)  
11 [TB\\_DRUGS\\_UTM\\_\\_4th\\_edition\\_2016.pdf](http://www.msfaccess.org/sites/default/files/TB_report__DR-TB_DRUGS_UTM__4th_edition_2016.pdf) (accessed 22 Mar 2016).
- 12
- 13 18 NHS Digital. Prescribing Costs in Hospitals and the Community, England 2016/17: NICE Data.  
14 <https://files.digital.nhs.uk/publication/n/0/hosp-pres-eng-201617-nicedata.csv> (accessed 28 Oct  
15 2018).
- 16
- 17 19 Garg CC, Karan AK. Reducing out-of-pocket expenditures to reduce poverty: A disaggregated  
18 analysis at rural-urban and state level in India. *Health Policy Plan* 2009;**24**:116–128.  
19 doi:10.1093/heapol/czn046
- 20
- 21 20 Kotwani A, Levison L. Price components and access to medicines in Delhi, India.  
22 2007.<http://apps.who.int/medicinedocs/documents/s19208en/s19208en.pdf>
- 23
- 24 21 World Health Organization. WHO guidelines on country pharmaceutical pricing policies. 2015.  
25 <http://apps.who.int/medicinedocs/documents/s21016en/s21016en.pdf>
- 26
- 27 22 Republic of South Africa National Department of Health. *Special Requirements and Conditions of*  
28 *Contract. HP09–2016SD/01. The supply and delivery of solid dosage forms to the Department of*  
29 *Health for the period up to 31 July 2018*. 2017.  
30 <http://www.health.gov.za/tender/docs/contracts/HP092016SD01ContractCircular.pdf> (accessed  
31 11 Jul 2017).
- 32
- 33 23 Central Board of Excise and Customs. Notification No. 140/2016.  
34 [https://www.seair.co.in/custom-notifications/notifications-issued-in-the-year-2016-notification-](https://www.seair.co.in/custom-notifications/notifications-issued-in-the-year-2016-notification-no-1402016-dated-25th-nov-2016-268128.aspx)  
35 [no-1402016-dated-25th-nov-2016-268128.aspx](https://www.seair.co.in/custom-notifications/notifications-issued-in-the-year-2016-notification-no-1402016-dated-25th-nov-2016-268128.aspx) (accessed 4 Apr 2017).
- 36
- 37 24 World Health Organization. Medicines shortages: Global approaches to addressing shortages of  
38 essential medicines in health systems. *WHO Drug Inf* 2016;**30**.
- 39
- 40 25 Gray A, Manasse H. Shortages of medicines: a complex global challenge. *Bull World Health*  
41 *Organ* 2012;**90**:158–158. doi:10.2471/BLT.11.101303
- 42
- 43 26 Iyengar S, Hedman L, Forte G, *et al*. Medicine shortages: a commentary on causes and mitigation  
44 strategies. *BMC Med* 2016;**14**. doi:10.1186/s12916-016-0674-7
- 45
- 46
- 47
- 48
- 49
- 50
- 51
- 52
- 53
- 54
- 55
- 56
- 57
- 58
- 59
- 60

1  
2  
3 **TABLES AND FIGURES**  
4  
5  
6  
7  
8  
9  
10  
11  
12  
13  
14  
15  
16  
17  
18  
19  
20  
21  
22  
23  
24  
25  
26  
27  
28  
29  
30  
31  
32  
33  
34  
35  
36  
37  
38  
39  
40  
41  
42  
43  
44  
45  
46  
47  
48  
49  
50  
51  
52  
53  
54  
55  
56  
57  
58  
59  
60

For peer review only

**Table 1. Comparison of estimated prices, API cost, and lowest current prices in UK, South Africa, and India.**

|                                                  | <b>UK</b> | <b>South Africa</b> | <b>India</b> |
|--------------------------------------------------|-----------|---------------------|--------------|
| <b>Injectables</b>                               |           |                     |              |
| >10x estimated price                             | 16 (19%)  | 7 (12%)             | 4 (5%)       |
| 0-10x estimated price                            | 47 (56%)  | 32 (53%)            | 10 (12%)     |
| Below estimated price                            | 21 (25%)  | 21 (35%)            | 69 (83%)     |
| Median ratio of current price to estimated price | 2.45x     | 1.47x               | 0.29x        |

Note: multiple dosage levels of one formulation of one medicine (e.g. ifosfamide powder for injection in 1g and 2g forms) are counted as one instance in these overview statistics.

**Table 2. Injectable essential medicines with the highest price compared to API cost or estimated cost-based price, in the UK.**

| Medicine                        | Unit                          | Lowest current price (USD) | Estimated cost-based price (USD) | Ratio |
|---------------------------------|-------------------------------|----------------------------|----------------------------------|-------|
| linezolid                       | 300mL infusion bag (600mg)    | \$578.50                   | \$0.61                           | 954.2 |
| irinotecan                      | 5mL vial (100mg)              | \$143.81                   | \$1.29                           | 111.5 |
| filgrastim                      | 1mL vial (300mcg)             | \$68.52                    | \$0.67                           | 102.4 |
| ibuprofen                       | 1mL injection (5mg)           | \$46.80                    | \$0.67                           | 70.3  |
| daunorubicin                    | powder for injection (50mg)   | \$211.25                   | \$3.16                           | 66.8  |
| azathioprine                    | powder for injection (100mg)  | \$39.99                    | \$0.73                           | 55.0  |
| ifosfamide                      | powder for injection (2g)     | \$233.84                   | \$4.51                           | 51.9  |
| ifosfamide                      | powder for injection (1g)     | \$118.72                   | \$2.59                           | 45.9  |
| ifosfamide                      | powder for injection (500mg)  | \$59.35                    | \$1.63                           | 36.5  |
| mesna                           | 10mL ampoule (1000mg)         | \$38.23                    | \$1.24                           | 30.8  |
| atropine                        | 1mL ampoule (1mg)             | \$8.25                     | \$0.27                           | 30.6  |
| ampicillin                      | powder for injection (1000mg) | \$20.36                    | \$0.71                           | 28.7  |
| mesna                           | 4mL ampoule (400mg)           | \$17.43                    | \$0.66                           | 26.6  |
| phenobarbital                   | 1mL injection (200mg)         | \$7.32                     | \$0.29                           | 25.2  |
| leuprorelin                     | pre-filled syringe (7.5mg)    | \$195.62                   | \$8.11                           | 24.1  |
| epinephrine                     | 10mL ampoule (1mg)            | \$6.97                     | \$0.29                           | 23.7  |
| valproic acid                   | 4mL ampoule (400mg)           | \$5.09                     | \$0.28                           | 18.1  |
| sulfamethoxazole + trimethoprim | 10mL ampoule (800mg+160mg)    | \$4.62                     | \$0.29                           | 16.2  |
| zidovudine                      | 20mL vial (200mg)             | \$11.60                    | \$0.74                           | 15.7  |
| ampicillin                      | powder for injection (500mg)  | \$10.18                    | \$0.69                           | 14.8  |

**Table 3. Injectable essential medicines with the highest price compared to estimated cost-based price or API cost, in South Africa.**

| Medicine          | Unit                          | Lowest current price (USD) | Estimated cost-based price (USD) | Ratio |
|-------------------|-------------------------------|----------------------------|----------------------------------|-------|
| filgrastim        | 1mL vial (300mcg)             | \$32.38                    | \$0.67                           | 48.4  |
| linezolid         | 300mL infusion bag (600mg)    | \$21.90                    | \$0.61                           | 36.1  |
| tranexamic acid   | 10mL ampoule (1000mg)         | \$9.74                     | \$0.40                           | 24.1  |
| ifosfamide        | powder for injection (1g)     | \$33.02                    | \$2.59                           | 12.8  |
| ifosfamide        | powder for injection (2g)     | \$56.02                    | \$4.51                           | 12.4  |
| ifosfamide        | powder for injection (500mg)  | \$19.81                    | \$1.63                           | 12.2  |
| streptokinase     | powder for injection (15.6mg) | \$257.52                   | \$21.56                          | 11.9  |
| amiodarone        | ampoule (150mg/3mL)           | \$3.30                     | \$0.30                           | 11.2  |
| digoxin           | 2mL ampoule (500mcg)          | \$2.81                     | \$0.27                           | 10.3  |
| digoxin           | 2mL ampoule (500mcg)          | \$2.81                     | \$0.27                           | 10.3  |
| fluphenazine      | 1mL ampoule (25mg)            | \$2.64                     | \$0.35                           | 7.5   |
| oxaliplatin       | powder for injection (100mg)  | \$68.72                    | \$10.01                          | 6.9   |
| oxaliplatin       | powder for injection (50mg)   | \$34.36                    | \$5.34                           | 6.4   |
| magnesium sulfate | 10mL ampoule (5g)             | \$1.57                     | \$0.29                           | 5.5   |
| ciclosporin       | 1mL ampoule (50mg)            | \$1.98                     | \$0.37                           | 5.4   |
| docetaxel         | injection (20mg)              | \$24.95                    | \$4.63                           | 5.4   |
| docetaxel         | injection (40mg)              | \$39.44                    | \$8.60                           | 4.6   |
| mesna             | 4mL ampoule (400mg)           | \$2.77                     | \$0.66                           | 4.2   |
| daunorubicin      | powder for injection (50mg)   | \$11.53                    | \$3.16                           | 3.6   |
| vincristine       | powder for injection (5mg)    | \$16.00                    | \$4.57                           | 3.5   |

**Table 4. Injectable essential medicines with the highest price compared to estimated cost-based price or API cost, in India.**

| Medicine                         | Unit                        | Lowest current price (USD) | Estimated cost-based price (USD) | Ratio |
|----------------------------------|-----------------------------|----------------------------|----------------------------------|-------|
| irinotecan                       | 25mL vial (500mg)           | \$112.50                   | \$3.79                           | 29.7  |
| filgrastim                       | 1mL vial (300mcg)           | \$16.50                    | \$0.67                           | 24.7  |
| irinotecan                       | 5mL vial (100mg)            | \$22.50                    | \$1.29                           | 17.4  |
| leuprorelin                      | pre-filled syringe (7.5mg)  | \$111.30                   | \$8.11                           | 13.7  |
| irinotecan                       | 2mL vial (40mg)             | \$11.25                    | \$0.92                           | 12.3  |
| bendamustine                     | 2mL injection (180mg)       | \$194.40                   | \$16.55                          | 11.7  |
| bendamustine                     | 0.5mL injection (45mg)      | \$48.60                    | \$4.64                           | 10.5  |
| leuprorelin                      | pre-filled syringe (22.5mg) | \$252.00                   | \$24.34                          | 10.4  |
| valproic acid (sodium valproate) | 10mL ampoule (1g)           | \$3.00                     | \$0.30                           | 9.8   |
| enoxaparin                       | 0.6mL injection (60mg)      | \$4.55                     | \$0.77                           | 5.9   |
| enoxaparin                       | 0.2mL injection (20mg)      | \$1.52                     | \$0.26                           | 5.9   |
| enoxaparin                       | 1mL injection (100mg)       | \$7.58                     | \$1.28                           | 5.9   |
| linezolid                        | 300mL infusion bag (600mg)  | \$3.47                     | \$0.61                           | 5.7   |
| ciclosporin                      | 1mL ampoule (50mg)          | \$1.80                     | \$0.37                           | 4.9   |
| testosterone                     | 1mL ampoule (200mg)         | \$1.41                     | \$0.30                           | 4.7   |
| valproic acid (sodium valproate) | 4mL ampoule (400mg)         | \$1.20                     | \$0.28                           | 4.3   |
| enoxaparin                       | 0.4mL injection (40mg)      | \$1.58                     | \$0.51                           | 3.1   |
| enoxaparin                       | 0.8mL injection (80mg)      | \$3.15                     | \$1.03                           | 3.1   |
| insulin injection (soluble)      | 10mL injection (34.7mg)     | \$6.09                     | \$2.37                           | 2.6   |
| sodium nitroprusside             | powder for injection (50mg) | \$0.68                     | \$0.28                           | 2.4   |

1  
2  
3  
4 **Figure 1. Formula for estimating cost-based prices for injectable formulations.**  
5

6  
7 **Figure 2. Estimated generic prices and current prices for injectables in UK, South Africa,**  
8 **and India.**  
9

10 **Figure 3. Comparison of lowest current prices of injectable essential medicines between**  
11 **the UK, South Africa, and India.**  
12  
13  
14  
15  
16  
17  
18  
19  
20  
21  
22  
23  
24  
25  
26  
27  
28  
29  
30  
31  
32  
33  
34  
35  
36  
37  
38  
39  
40  
41  
42  
43  
44  
45  
46  
47  
48  
49  
50  
51  
52  
53  
54  
55  
56  
57  
58  
59  
60

For peer review only

1  
2  
3  
4  
5  
6  
7  
8  
9  
10  
11  
12  
13  
14  
15  
16  
17  
18  
19  
20  
21  
22  
23  
24  
25  
26  
27  
28  
29  
30  
31  
32  
33  
34

Multiply by mass of API needed for one dosage unit

If applicable, multiply by [MW/dosage in one unit] to adjust for salt forms

Multiply by 1.1 to account for 10% loss of API during formulation and overfill

Total cost of production per unit

Add \$0.20 for ampoule/\$0.50 for vial for cost of materials and formulation

Add costs of transportation 10%

Add taxes 10%

Add profit margin of 10%

Estimated cost-based price



## UK

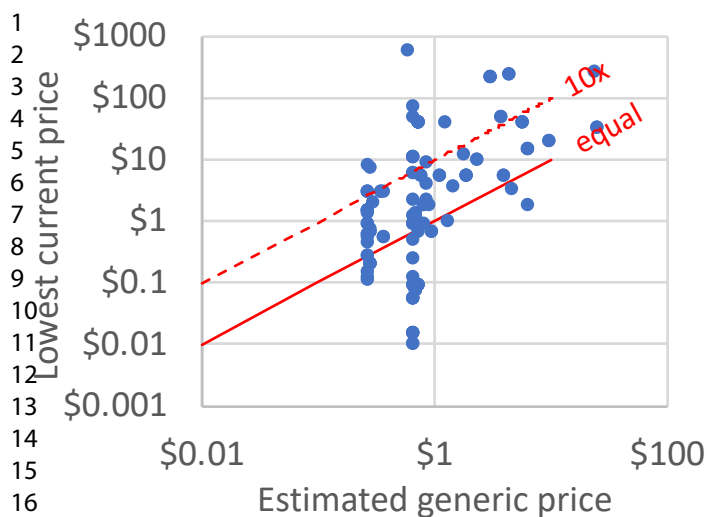

## South Africa

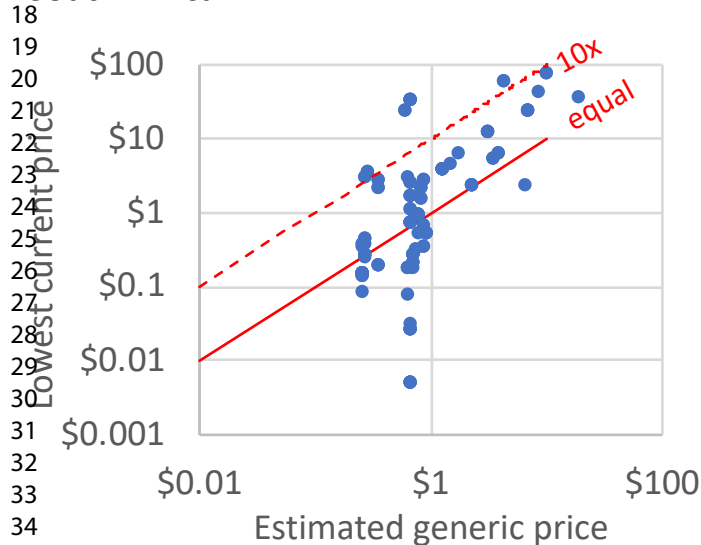

## India

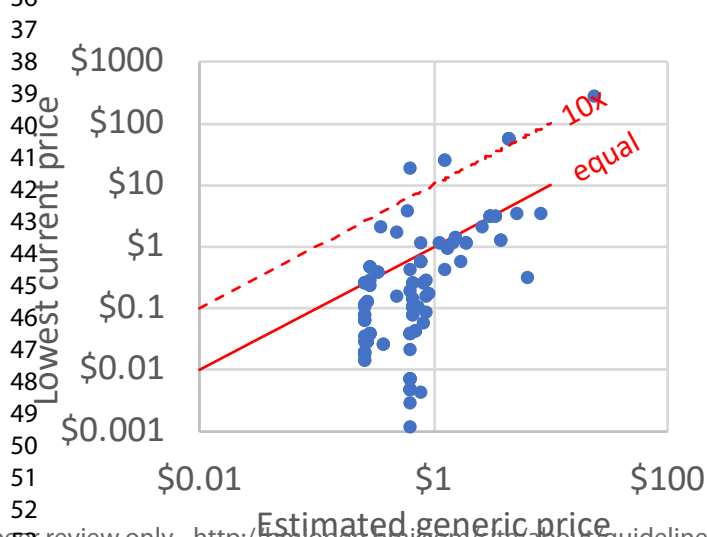

### UK versus South Africa

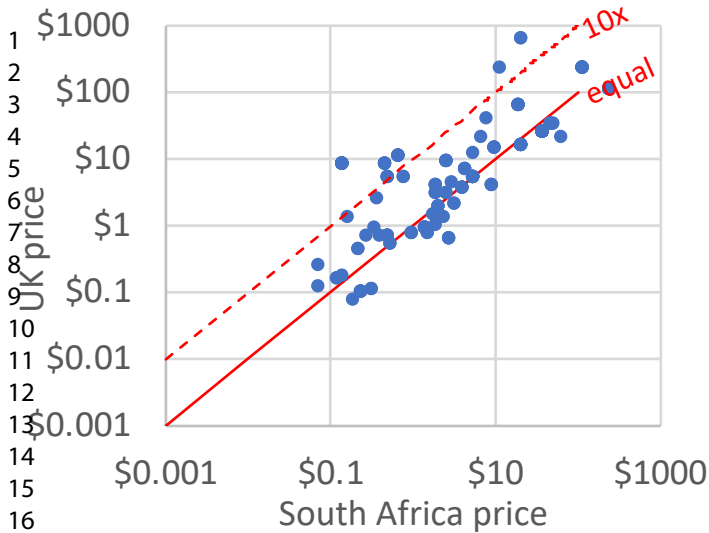

### UK versus India

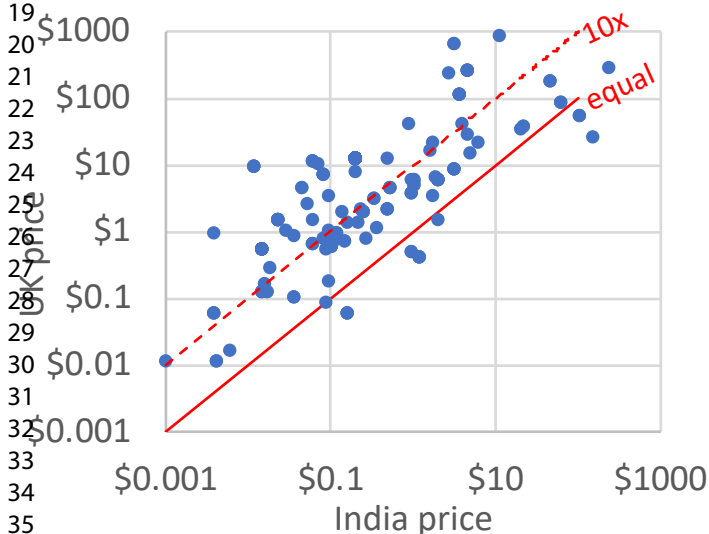

### South Africa versus India

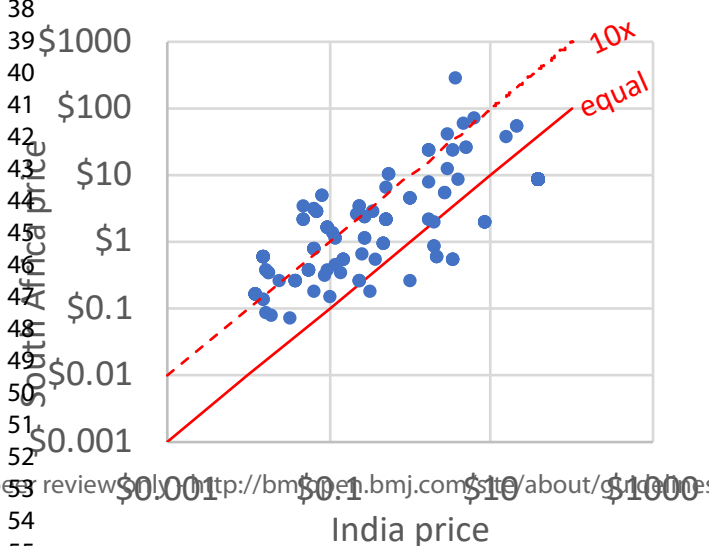

**Appendix**

For peer review only

1  
2  
3  
4  
5  
6  
7  
8  
9  
10  
11  
12  
13  
14  
15  
16  
17  
18  
19  
20  
21  
22  
23  
24  
25  
26  
27  
28  
29  
30  
31  
32  
33  
34  
35  
36  
37  
38  
39  
40  
41  
42  
43  
44  
45  
46  
47  
48  
49  
50  
51  
52  
53  
54  
55  
56  
57  
58  
59  
60

#### Criteria used for cleaning export data.

| Reason for censoring                                                            | Example of product description that would trigger censoring                                                                                                                                                 |
|---------------------------------------------------------------------------------|-------------------------------------------------------------------------------------------------------------------------------------------------------------------------------------------------------------|
| Incorrect substance identified                                                  | "DIAMORPHINE" (in a search for "morphine")                                                                                                                                                                  |
| Item is part of a mix of products                                               | "ABACAVIR, LOPINAVIR, LAMIVUDINE API"                                                                                                                                                                       |
| Quantity of shipment < 1.0 kg, with exceptions made for very low-dose medicines | Value listed in "quantity" variable greater than 1.0kg                                                                                                                                                      |
| Finished Pharmaceutical Product (FPP), for example tablets                      | "ABACAVIR SULFATE TABLETS 600MG"                                                                                                                                                                            |
| Impurity                                                                        | "ABACAVIR SULPHATE IMPURITY"                                                                                                                                                                                |
| Unclear quantity of API                                                         | "ABACAVIR GRANULES 10%"<br>(In this example, the percentage descriptor could refer to a variety of parameters, for example, moisture content. As this is not specified, the true amount of API is unknown.) |
| Free sample or 'no commercial value'                                            | "ABACAVIR SULPHATE FREE SAMPLE"<br>"ABACAVIR SULPHATE N.C.V."                                                                                                                                               |
| For veterinary use                                                              | "IVERMECTIN VETERINARY"                                                                                                                                                                                     |
| Reference/working standard                                                      | "ABACAVIR WORKING STANDARD"                                                                                                                                                                                 |

This table is reproduced from an earlier publication as this element of the methodology was identical:

Hill A, Barber MJ, Gotham D. Estimated costs of production and potential prices for the WHO Essential Medicines List. *BMJ Global Health* 2018; e000571.

**Included and excluded formulation types, by terms used in WHO Model List of Essential Medicines.**

|                                                                                                                                                                                                                                                                                                                                                                                                                                                                                                                                                                                                                                                                                                                                                                                                                                                                                                                                                                                                                                                                                                                                                                                                     |
|-----------------------------------------------------------------------------------------------------------------------------------------------------------------------------------------------------------------------------------------------------------------------------------------------------------------------------------------------------------------------------------------------------------------------------------------------------------------------------------------------------------------------------------------------------------------------------------------------------------------------------------------------------------------------------------------------------------------------------------------------------------------------------------------------------------------------------------------------------------------------------------------------------------------------------------------------------------------------------------------------------------------------------------------------------------------------------------------------------------------------------------------------------------------------------------------------------|
| <b>Included:</b>                                                                                                                                                                                                                                                                                                                                                                                                                                                                                                                                                                                                                                                                                                                                                                                                                                                                                                                                                                                                                                                                                                                                                                                    |
| Concentrate for injection, depot injection, infusion, injectable solution, injection, injection for intravenous administration, injection for spinal anaesthesia, injection in oil, injection: ampoule or pre-filled syringe, injections, oily injection, oily solution, oily suspension for injection, parenteral formulation, powder for injection, solution for injection, solution for intramuscular injection, solution for IV infusion, vial or prefilled syringe.                                                                                                                                                                                                                                                                                                                                                                                                                                                                                                                                                                                                                                                                                                                            |
| <b>Excluded:</b>                                                                                                                                                                                                                                                                                                                                                                                                                                                                                                                                                                                                                                                                                                                                                                                                                                                                                                                                                                                                                                                                                                                                                                                    |
| Ampoule (for buccal administration when solution for oromucosal administration is not available), aqueous solution*, capsule, cream, cream (as mupirocin calcium), cream or lotion, cream or ointment, dental cartridge, detergent-based suspension, eye ointment, gel or rectal solution, granules, granules (slow-release; to mix with water), immediate release capsule, inhalation (aerosol), lotion, lozenge, metered dose inhaler (aerosol), nasal spray, ointment, oral liquid, oral powder, pessary, powder for oral administration, powder for oral liquid, rectal dosage form, rectal solution, respirator solution for use in nebulizers, retention enema, saturated solution, solid oral dosage form, solid oral dosage form (controlled-release tablets), solid oral form, solution, solution (eye drops), solution for oromucosal administration, suppository, tablet, tablet (chewable), tablet (crushable), tablet (dispersible, scored), tablet (dispersible), tablet (enteric-coated), tablet (heat stable), tablet (immediate release), tablet (scored), tablet (slow release), tablet (sublingual), topical, topical forms, transdermal patches, vaginal cream, vaginal tablet. |

\*this represents potassium permanganate for topical use in dermatology.

Figure A1. Example of API data: Price of linezolid API exported from India from July 1, 2014 to July 1, 2016.

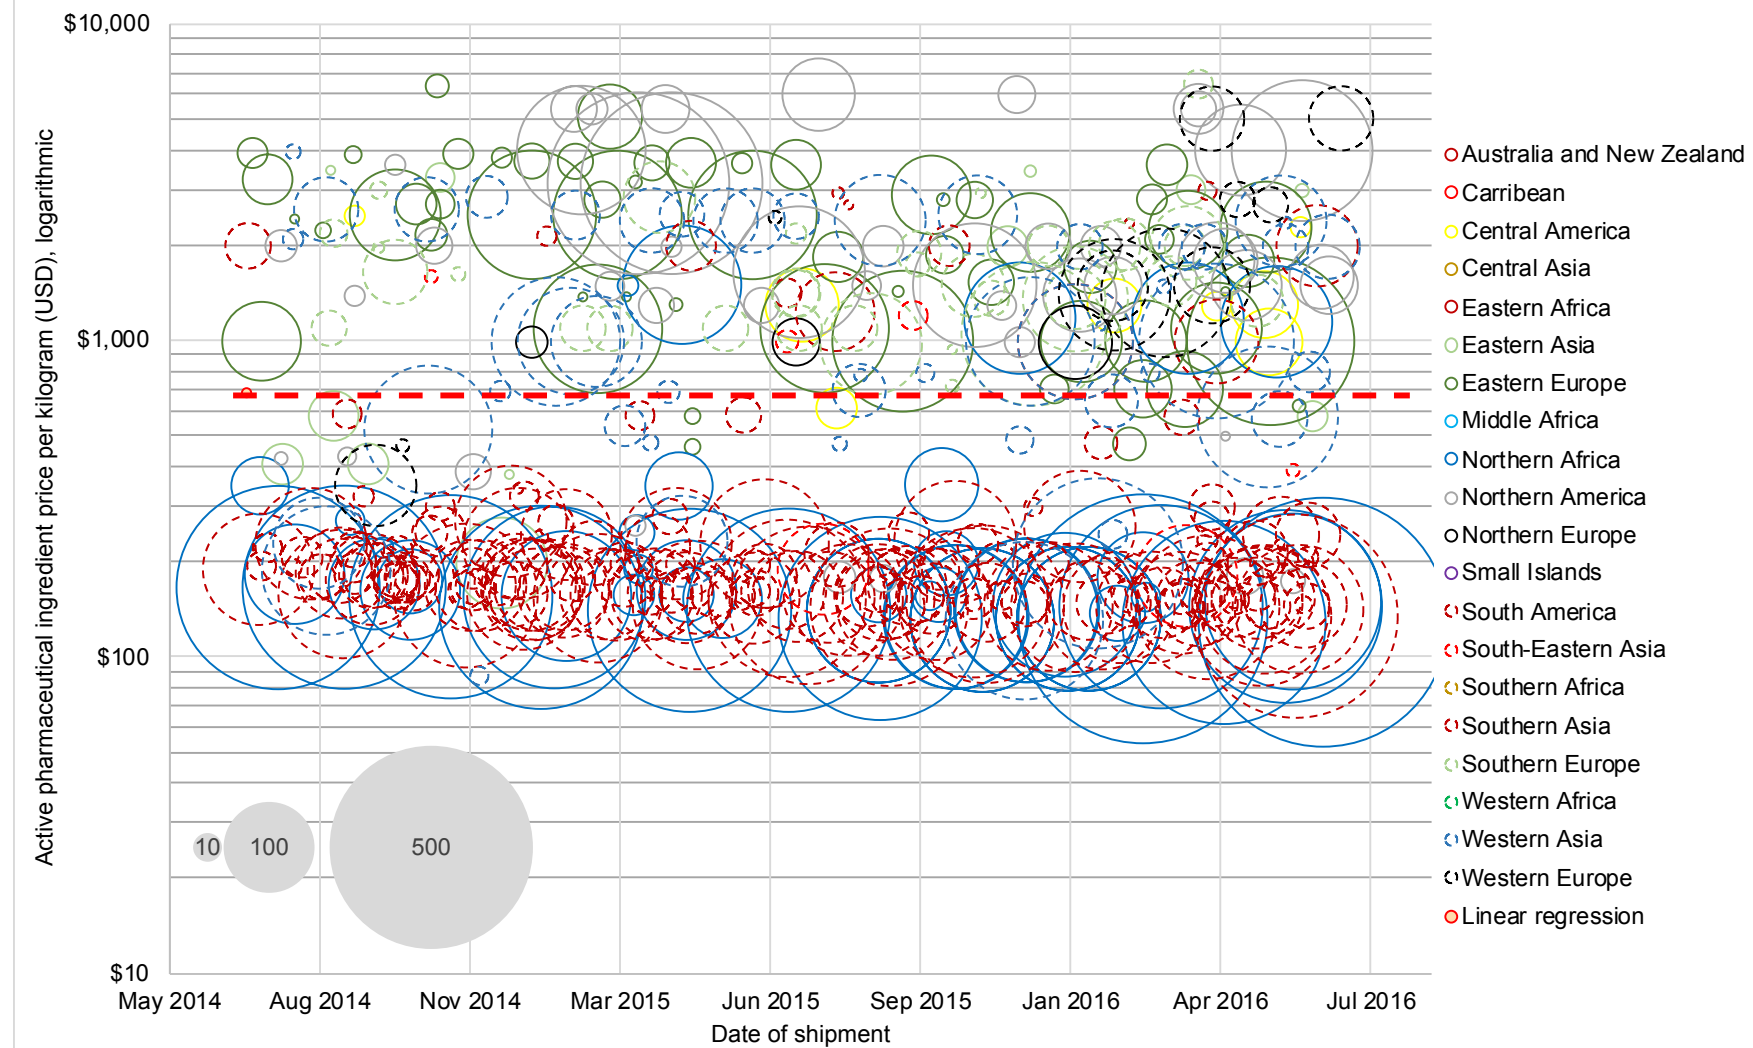

Bubble colours correspond to the region of the destination country for individual shipments. Bubble sizes correspond to the size of individual shipments (size key shown in lower-left, in kilograms). The linear regression model is shown as a dashed red line; though it appears horizontal it has a slight upwards slope. The values estimated by the linear regression model were \$683/kg on July 1, 2014, and \$690/kg on July 1, 2016.

## Costs prescribed in India's Drug Price Control Order (2012).

| Item                                           | Cost per unit in 2011 Indian rupees | Converted to 2016 USD |
|------------------------------------------------|-------------------------------------|-----------------------|
| <b>Conversion cost</b>                         |                                     |                       |
| <i>Ampoules</i>                                |                                     |                       |
| Up to 1mL                                      | 0.4253                              | \$0.008               |
| 100mL                                          | 1.4327                              | \$0.028               |
| <i>Sterile vials</i>                           |                                     |                       |
| Up to 5mL                                      | 1.22                                | \$0.024               |
| 100mL                                          | 3.21                                | \$0.063               |
| <b>Packing materials cost</b>                  |                                     |                       |
| <i>USP type I glass vial including blister</i> |                                     |                       |
| Up to 2mL                                      | 1.48                                | \$0.029               |
| 100mL                                          | 6.96                                | \$0.136               |
| <i>Plastic vial/bottle</i>                     |                                     |                       |
| Up to 2mL                                      | 0.99                                | \$0.019               |
| 100mL                                          | 2.96                                | \$0.058               |
| <i>Ampoules</i>                                |                                     |                       |
| <i>White ampoule in tray</i>                   |                                     |                       |
| Up to 1mL                                      | 0.53                                | \$0.010               |
| 25mL                                           | 2.86                                | \$0.056               |
| <i>Amber ampoules in blister</i>               |                                     |                       |
| Up to 1mL                                      | 0.63                                | \$0.012               |
| 25mL                                           | 4.68                                | \$0.091               |
| <b>Packing charges</b>                         |                                     |                       |
| <i>Ampoules</i>                                |                                     |                       |
| Up to 5mL                                      | 0.33                                | \$0.006               |
| Over 15mL                                      | 0.56                                | \$0.011               |
| <i>Liquid in vials</i>                         |                                     |                       |
| Up to 5mL                                      | 0.6                                 | \$0.012               |
| Over 5mL                                       | 0.69                                | \$0.013               |
| <i>Sterile powder in vials</i>                 |                                     |                       |
| Up to 1g                                       | 0.23                                | \$0.004               |
| Over 1g                                        | 0.38                                | \$0.007               |
| <b>Ampoules range</b>                          |                                     | <b>\$0.03–\$0.13</b>  |
| <b>Vials range</b>                             |                                     | <b>\$0.05–\$0.21</b>  |

Pharmabiz.com. NPPA notification dated Dec 27, 2012 fixing/revising the norms for conversion cost (CC), packing charges (PC), process loss (PL) and packing material. Available from: <http://pharmabiz.com/PrintArticle.aspx?aid=72988> (accessed 6 November 2018).

Rupee values were inflation-adjusted by a factor of 1.30, based on inflation data provided by the World Bank, available from <https://data.worldbank.org/indicator/FP.CPI.TOTL.ZG?locations=IN>.

**Figure A2. Injectable target prices versus injectable API cost alone (all USD).**

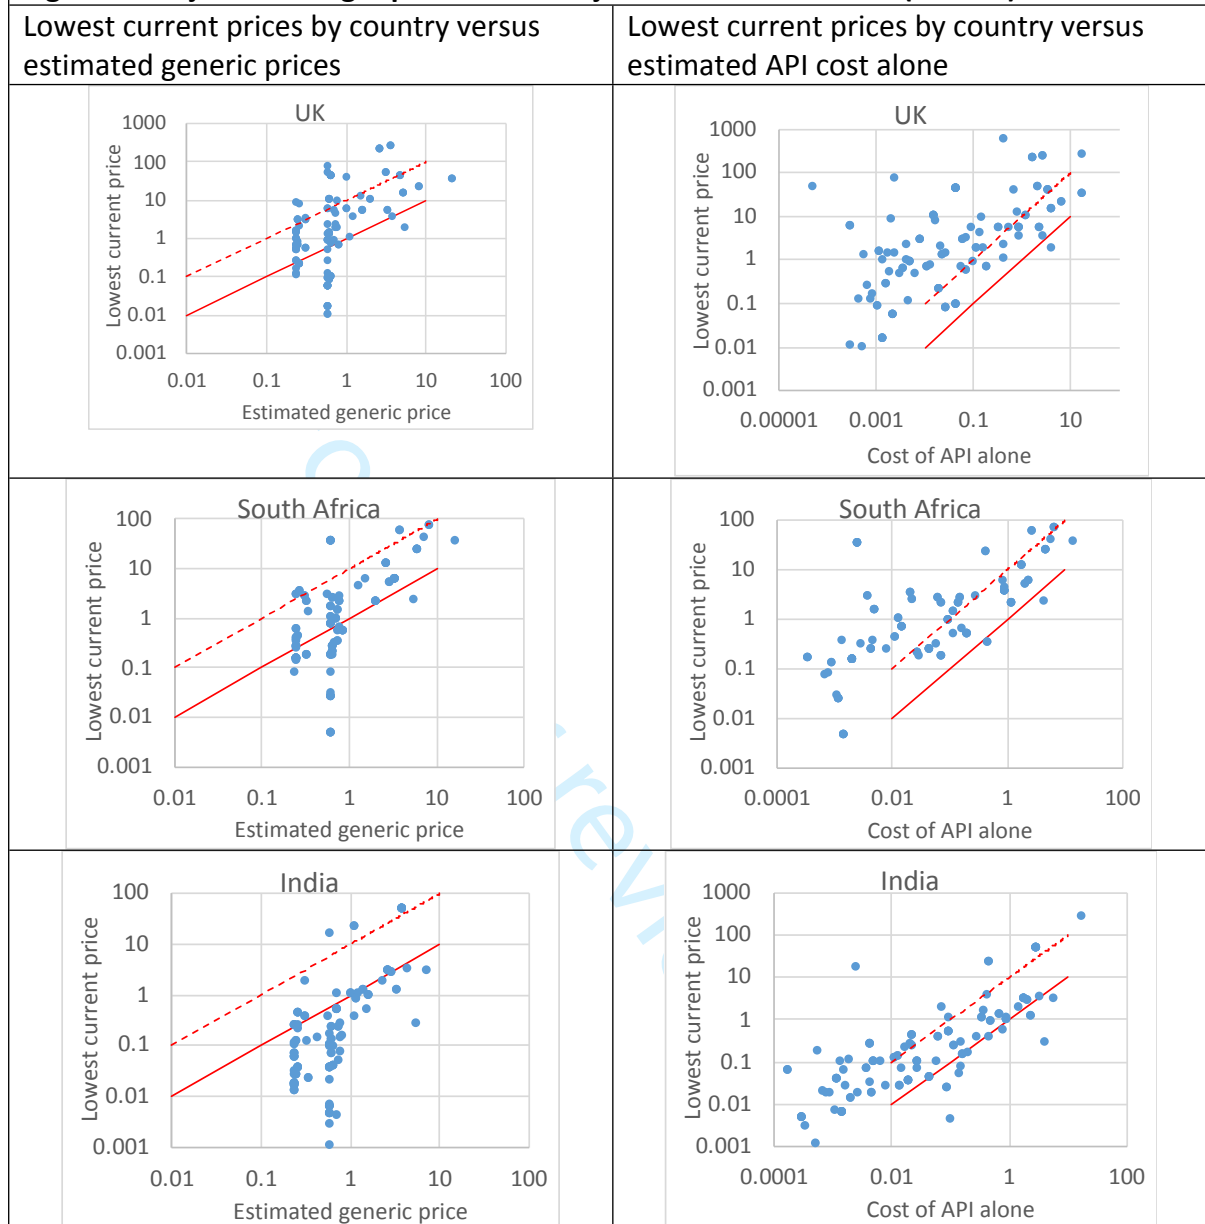

**Solid red line:** Points above this line represent an instance where the lowest current price is greater than the estimated generic price/API cost.

**Dashed red line:** Points above this line represent an instance where the lowest current price is more than 10 times the estimated generic price/API cost.

'Floors' can be seen for estimated generic price at \$0.27 and \$0.67 – the cost-based prices estimated by our algorithm for ampoules and vials, respectively, if API costs are zero, therefore, the estimated cost-based price cannot be below these 'floors'. In all countries, it can be observed that in some cases (in India more than in South Africa more than in UK) lowest current prices go below these 'floors'.



Ratio of estimated cost-based prices to lowest current prices in the UK, South Africa, and India, by therapeutic category.

| Medicine                                                             | UK   | South Africa | India |
|----------------------------------------------------------------------|------|--------------|-------|
| Anaesthetics                                                         | 0.2  | 0.2          | 0.1   |
| Medicines for pain and palliative care                               | 0.6  | 0.5          | 0.1   |
| Antiallergics and medicines used in anaphylaxis                      | 0.7  | 1.0          | 0.1   |
| Antidotes and other substances used in poisonings                    | 16.5 | 1.0          | 0.2   |
| Anticonvulsants/antiepileptics                                       | 2.5  | 1.7          | 0.2   |
| Anti-infectives                                                      | 1.8  | 1.0          | 0.3   |
| Antimigraine medicines                                               | NA   | NA           | NA    |
| Antineoplastics and immunosuppressives                               | 2.8  | 2.4          | 0.6   |
| Antiparkinsonism medicines                                           | NA   | NA           | NA    |
| Medicines affecting the blood                                        | 6.0  | 2.8          | 1.4   |
| Cardiovascular medicines                                             | 4.7  | 10.3         | 0.2   |
| Dermatological Medicines (topical)                                   | NA   | NA           | NA    |
| Diuretics                                                            | 0.2  | 0.1          | 0.0   |
| Gastrointestinal medicines                                           | 1.2  | 1.1          | 0.1   |
| Hormones, other endocrine medicines and contraceptives               | 4.1  | 0.9          | 2.7   |
| Muscle relaxants (peripherally-acting) and cholinesterase inhibitors | 1.4  | 0.5          | 0.1   |
| Ophthalmological Preparations                                        | NA   | NA           | NA    |
| Oxytocics and antioxytocics                                          | 3.4  | 1.4          | 0.4   |
| Medicines for mental and behavioural disorders                       | 5.2  | 7.5          | 0.1   |
| Medicines acting on the respiratory tract                            | 0.7  | NA           | 0.1   |
| Ear, nose and throat medicines (children)                            | NA   | NA           | NA    |
| Specific medicines for neonatal care                                 | 39.4 | 0.9          | 0.1   |
| Medicines for diseases of joints                                     | NA   | NA           | NA    |

**Full results table: Lowest current prices in the UK, South Africa, and India, and estimated cost-based generic prices.**

| Medicine                    | Unit                             | UK price (USD) | UK price source | South Africa price (USD) | India price (USD) | India source | Cost of API per unit | Estimated cost-based product price per unit |
|-----------------------------|----------------------------------|----------------|-----------------|--------------------------|-------------------|--------------|----------------------|---------------------------------------------|
| acetylcysteine              | 2000mg ampoule                   | \$1.36         | eMIT            | \$1.81                   | \$2.10            | TN           |                      |                                             |
| aciclovir                   | powder for injection (250mg)     | \$1.24         | eMIT            | \$2.42                   | \$0.24            | TN           | \$0.02215            | \$0.69793                                   |
| amikacin                    | powder for injection (100mg)     | \$2.38         | eMIT            | \$0.38                   | \$0.06            | TN           |                      |                                             |
| amikacin                    | powder for injection (500mg)     | \$11.92        | eMIT            | \$0.32                   | \$0.14            | TN           |                      |                                             |
| amikacin                    | powder for injection (1000mg)    | \$23.83        | eMIT            | \$0.64                   | \$0.28            | TN           |                      |                                             |
| amiodarone                  | ampoule (150mg/3mL)              | \$1.95         | BNF             | \$3.30                   | \$0.25            | TN           | \$0.02024            | \$0.29583                                   |
| amphotericin B              | powder for injection (50mg)      | \$5.04         | BNF             |                          | \$1.07            | TN           | \$0.09296            | \$0.80160                                   |
| amphotericin B              | powder for injection (50mg)      | \$5.04         | BNF             |                          | \$1.07            | TN           | \$0.09296            | \$0.80160                                   |
| ampicillin                  | powder for injection (500mg)     | \$10.18        | BNF             | \$0.70                   | \$0.07            | TN           | \$0.01471            | \$0.68703                                   |
| ampicillin                  | powder for injection (1000mg)    | \$20.36        | BNF             | \$1.39                   | \$0.13            | TN           | \$0.02941            | \$0.70856                                   |
| artemether                  | ampoule (80mg/1mL)               |                |                 |                          | \$0.42            | P            | \$0.02194            | \$0.29832                                   |
| asparaginase                | powder for injection (10,000iU)  | \$796.90       | BNF             |                          | \$12.15           | TN           |                      |                                             |
| atracurium                  | 1mL injection (10mg)             | \$0.86         | BNF             |                          | \$0.00            | TN           | \$0.09646            | \$0.80673                                   |
| atropine                    | 1mL ampoule (1mg)                | \$8.25         | BNF             | \$0.15                   | \$0.01            | TN           | \$0.00198            | \$0.26910                                   |
| atropine                    | 1mL ampoule (1mg)                | \$8.25         | BNF             | \$0.15                   | \$0.01            | TN           | \$0.00198            | \$0.26910                                   |
| azathioprine                | powder for injection (100mg)     | \$39.99        | BNF             |                          |                   |              | \$0.04225            | \$0.72736                                   |
| bendamustine                | 0.5mL injection (45mg)           |                |                 |                          | \$48.60           | P            | \$2.71305            | \$4.63768                                   |
| bendamustine                | 2mL injection (180mg)            |                |                 |                          | \$194.40          | P            | \$10.85220           | \$16.55421                                  |
| benzathine benzylpenicillin | 5mL vial (900mg)                 |                |                 |                          | \$0.17            | P            |                      |                                             |
| benzathine benzylpenicillin | 5mL vial (1.44g)                 |                |                 |                          | \$0.24            | P            |                      |                                             |
| benzylpenicillin            | powder for injection (600mg)     | \$3.04         | BNF             |                          | \$0.10            | TN           |                      |                                             |
| benzylpenicillin            | powder for injection (3g)        | \$15.18        | BNF             |                          | \$0.51            | TN           |                      |                                             |
| bevacizumab                 | 1mL injection (25mg)             | \$78.86        | BNF             |                          | \$66.75           | TN           |                      |                                             |
| bleomycin                   | powder for injection (15mg)      | \$24.78        | BNF             |                          | \$4.83            | TN           |                      |                                             |
| bupivacaine                 | 1mL injection (5mg)              | \$0.09         | eMIT            | \$0.03                   | \$0.01            | TN           | \$0.00103            | \$0.66701                                   |
| bupivacaine                 | 1mL injection (2.5mg)            | \$0.11         | eMIT            |                          | \$0.02            | P            | \$0.00051            | \$0.66625                                   |
| bupivacaine                 | 4mL ampoule (20mg, with glucose) |                |                 | \$0.24                   | \$0.24            | P            | \$0.00411            | \$0.27222                                   |
| caffeine citrate            | 1mL injection (20mg)             | \$5.70         | eMIT            |                          |                   |              | \$0.00030            | \$0.66594                                   |
| calcium folinate            | 10mL ampoule (30mg)              | \$6.01         | BNF             |                          | \$1.97            | P            |                      |                                             |
| calcium gluconate           | 10mL ampoule (1000mg)            | \$0.65         | eMIT            | \$0.41                   | \$0.12            | P            | \$0.01106            | \$0.28239                                   |
| capreomycin                 | powder for injection (1000mg)    | \$37.19        | BNF             | \$8.23                   | \$4.13            | P            |                      |                                             |
| carboplatin                 | 5mL injection (50mg)             | \$4.64         | eMIT            | \$4.39                   | \$1.85            | TN           | \$1.43635            | \$2.76845                                   |
| carboplatin                 | 15mL injection (150mg)           | \$9.91         | eMIT            | \$13.16                  | \$5.99            | TN           | \$4.30904            | \$6.97436                                   |
| carboplatin                 | 60mL injection (600mg)           | \$32.83        | eMIT            | \$52.63                  | \$23.94           | TN           | \$17.23615           | \$25.90095                                  |
| carboplatin                 | 45mL injection (450mg)           | \$24.78        | eMIT            | \$34.51                  | \$16.61           | TN           | \$12.92711           | \$19.59208                                  |
| cefazolin                   | powder for injection (1000mg)    |                |                 | \$0.61                   | \$0.27            | TN           | \$0.15187            | \$0.88785                                   |

|    |                  |                                 |          |      |         |        |    |            |            |
|----|------------------|---------------------------------|----------|------|---------|--------|----|------------|------------|
| 1  |                  |                                 |          |      |         |        |    |            |            |
| 2  |                  |                                 |          |      |         |        |    |            |            |
| 3  |                  |                                 |          |      |         |        |    |            |            |
| 4  | cefotaxime       | powder for injection (250mg)    | \$1.31   | eMIT | \$0.17  | \$0.07 | TN | \$0.02734  | \$0.70553  |
| 5  | ceftazidime      | powder for injection (250mg)    | \$1.77   | eMIT | \$0.51  | \$0.37 | P  | \$0.10774  | \$0.82325  |
| 6  | ceftazidime      | powder for injection (1000mg)   | \$0.99   | eMIT | \$2.04  | \$0.38 | P  | \$0.43097  | \$1.29649  |
| 7  | ceftriaxone      | powder for injection (250mg)    | \$1.43   | eMIT | \$0.31  | \$0.08 | TN | \$0.04759  | \$0.73517  |
| 8  | ceftriaxone      | powder for injection (1000mg)   | \$0.64   | eMIT | \$0.51  | \$0.15 | TN | \$0.19035  | \$0.94419  |
| 9  | chloramphenicol  | powder for injection (1000mg)   | \$1.81   | BNF  |         | \$0.14 | P  | \$0.15906  | \$0.89837  |
| 10 | chloramphenicol  | 2mL ampoule (1000mg)            |          |      |         | \$0.14 | P  | \$0.15906  | \$0.49907  |
| 11 | chlorpromazine   | 2mL ampoule (50mg)              | \$0.92   | eMIT |         | \$0.03 | P  | \$0.00429  | \$0.27249  |
| 12 | chlorpromazine   | 2mL ampoule (50mg)              | \$0.92   | eMIT |         | \$0.03 | P  | \$0.00429  | \$0.27249  |
| 13 | ciclosporin      | 1mL ampoule (50mg)              | \$3.02   | BNF  | \$1.98  | \$1.80 | P  | \$0.06771  | \$0.36533  |
| 14 | ciprofloxacin    | 1mL solution for infusion (2mg) | \$0.01   | eMIT |         | \$0.00 | TN | \$0.00051  | \$0.66624  |
| 15 | cisplatin        | 50mL injection (50mg)           | \$9.09   | eMIT | \$5.09  | \$2.70 | P  | \$1.94314  | \$3.51046  |
| 16 | cisplatin        | 100mL injection (100mg)         | \$13.73  | eMIT | \$10.17 | \$5.40 | P  | \$3.88629  | \$6.35542  |
| 17 | clindamycin      | 1mL injection (150mg)           | \$0.37   | eMIT |         | \$1.28 | P  |            |            |
| 18 | cloxacillin      | powder for injection (500mg)    |          |      | \$1.02  | \$0.13 | TN | \$0.01268  | \$0.68407  |
| 19 | cyclizine        | 1mL injection (50mg)            | \$2.11   | eMIT |         |        |    | \$0.00419  | \$0.67163  |
| 20 | cyclophosphamide | powder for injection (500mg)    | \$11.53  | eMIT | \$5.79  | \$0.53 | TN | \$0.78130  | \$1.80940  |
| 21 | cytarabine       | powder for injection (100mg)    | \$3.99   | eMIT | \$2.07  | \$0.05 | TN | \$0.13341  | \$0.86083  |
| 22 | dacarbazine      | powder for injection (100mg)    | \$5.42   | eMIT |         | \$1.07 | TN | \$0.33923  | \$1.16217  |
| 23 | dactinomycin     | powder for injection (500mcg)   |          |      |         | \$6.17 | P  |            |            |
| 24 | daunorubicin     | powder for injection (50mg)     | \$211.25 | BNF  | \$11.53 | \$2.91 | TN | \$1.70665  | \$3.16421  |
| 25 | deferoxamine     | injection (500mg)               | \$5.19   | BNF  | \$0.54  | \$2.23 | TN |            |            |
| 26 | deferoxamine     | powder for injection (500mg)    | \$5.19   | BNF  | \$0.54  | \$2.23 | TN |            |            |
| 27 | desmopressin     | 1mL ampoule (4mcg)              | \$1.46   | eMIT |         |        |    | \$0.00112  | \$0.26784  |
| 28 | dexamethasone    | 1mL ampoule (4mg)               |          |      | \$0.24  | \$0.03 | TN | \$0.00790  | \$0.27777  |
| 29 | dexamethasone    | 1mL ampoule (4mg)               |          |      | \$0.24  | \$0.03 | TN | \$0.00790  | \$0.27777  |
| 30 | dexamethasone    | 1mL ampoule (4mg)               |          |      | \$0.24  | \$0.03 | TN | \$0.00790  | \$0.27777  |
| 31 | dexamethasone    | 1mL ampoule (4mg)               |          |      | \$0.24  | \$0.03 | TN | \$0.00790  | \$0.27777  |
| 32 | dexamethasone    | 1mL ampoule (4mg)               |          |      | \$0.24  | \$0.03 | TN | \$0.00790  | \$0.27777  |
| 33 | diazepam         | 1mL injection (5mg)             | \$0.25   | eMIT | \$0.07  | \$0.02 | TN | \$0.00065  | \$0.66646  |
| 34 | digoxin          | 2mL ampoule (500mcg)            | \$0.60   | eMIT | \$2.81  | \$0.07 | P  | \$0.00354  | \$0.27138  |
| 35 | digoxin          | 2mL ampoule (500mcg)            | \$0.60   | eMIT | \$2.81  | \$0.07 | P  | \$0.00354  | \$0.27138  |
| 36 | dimercaprol      | 2mL ampoule (100mg)             |          |      |         | \$1.58 | P  |            |            |
| 37 | docetaxel        | injection (40mg)                |          |      | \$39.44 | \$3.04 | TN | \$5.42209  | \$8.60398  |
| 38 | docetaxel        | injection (20mg)                | \$3.30   | eMIT | \$24.95 | \$1.52 | TN | \$2.71104  | \$4.63474  |
| 39 | dopamine         | 5mL vial (200mg)                | \$0.68   | eMIT | \$0.30  | \$0.09 | TN | \$0.05528  | \$0.74644  |
| 40 | doxorubicin      | powder for injection (10mg)     | \$1.99   | eMIT | \$1.95  | \$0.52 | TN | \$0.45249  | \$1.32800  |
| 41 | doxorubicin      | powder for injection (50mg)     | \$5.25   | eMIT | \$5.82  | \$1.19 | TN | \$2.26247  | \$3.97798  |
| 42 | eflornithine     | 100mL injection (20g)           |          |      |         |        |    | \$27.83990 | \$41.42589 |
| 43 | enoxaparin       | 0.8mL injection (120mg)         | \$11.43  | BNF  |         |        |    | \$1.05251  | \$1.54098  |
| 44 | enoxaparin       | 1mL injection (150mg)           | \$12.99  | BNF  |         |        |    | \$1.31564  | \$1.92622  |
| 45 | enoxaparin       | 0.2mL injection (20mg)          | \$2.71   | BNF  | \$0.85  | \$1.52 | TN | \$0.17542  | \$0.25683  |
| 46 | enoxaparin       | 1mL injection (100mg)           | \$9.40   | BNF  | \$3.62  | \$7.58 | TN | \$0.87709  | \$1.28415  |
| 47 | enoxaparin       | 0.6mL injection (60mg)          | \$5.10   | BNF  | \$2.60  | \$4.55 | TN | \$0.52625  | \$0.77049  |
| 48 |                  |                                 |          |      |         |        |    |            |            |
| 49 |                  |                                 |          |      |         |        |    |            |            |
| 50 |                  |                                 |          |      |         |        |    |            |            |
| 51 |                  |                                 |          |      |         |        |    |            |            |
| 52 |                  |                                 |          |      |         |        |    |            |            |
| 53 |                  |                                 |          |      |         |        |    |            |            |
| 54 |                  |                                 |          |      |         |        |    |            |            |
| 55 |                  |                                 |          |      |         |        |    |            |            |
| 56 |                  |                                 |          |      |         |        |    |            |            |
| 57 |                  |                                 |          |      |         |        |    |            |            |
| 58 |                  |                                 |          |      |         |        |    |            |            |
| 59 |                  |                                 |          |      |         |        |    |            |            |
| 60 |                  |                                 |          |      |         |        |    |            |            |

|    |                  |                              |          |      |         |         |    |            |            |
|----|------------------|------------------------------|----------|------|---------|---------|----|------------|------------|
| 1  |                  |                              |          |      |         |         |    |            |            |
| 2  |                  |                              |          |      |         |         |    |            |            |
| 3  |                  |                              |          |      |         |         |    |            |            |
| 4  | enoxaparin       | 0.4mL injection (40mg)       | \$3.94   | BNF  | \$1.71  | \$1.58  | TN | \$0.35084  | \$0.51366  |
| 5  | enoxaparin       | 0.8mL injection (80mg)       | \$7.17   | BNF  | \$3.41  | \$3.15  | TN | \$0.70167  | \$1.02732  |
| 6  | ephedrine        | 1mL ampoule (30mg)           | \$0.52   | eMIT |         | \$0.11  | TN | \$0.00184  | \$0.26889  |
| 7  | epinephrine      |                              |          |      |         |         |    |            |            |
| 8  | (adrenaline)     | 10mL ampoule (1mg)           | \$6.97   | eMIT |         |         |    | \$0.01878  | \$0.29369  |
| 9  | epinephrine      |                              |          |      |         |         |    |            |            |
| 10 | (adrenaline)     | 1mL ampoule (1mg)            | \$0.20   | eMIT |         | \$0.04  | TN | \$0.01878  | \$0.29369  |
| 11 | epinephrine      |                              |          |      |         |         |    |            |            |
| 12 | (adrenaline)     | 1mL ampoule (1mg)            | \$0.20   | eMIT |         | \$0.04  | TN | \$0.01878  | \$0.29369  |
| 13 | ergometrine      | 1ml ampoule (0.2mg)          |          |      |         | \$0.03  | P  |            |            |
| 14 | erythromycin     | powder for injection (500mg) | \$11.12  | eMIT |         |         |    |            |            |
| 15 | etoposide        | 5mL ampoule (100mg)          | \$3.47   | eMIT | \$4.21  | \$1.02  | TN | \$0.84629  | \$1.50525  |
| 16 | filgrastim       | 1mL vial (300mcg)            | \$68.52  | BNF  | \$32.38 | \$16.50 | P  | \$0.00245  | \$0.66909  |
| 17 | filgrastim       | 1.6mL vial (480mcg)          |          |      |         |         |    | \$0.00392  | \$0.67124  |
| 18 | fluconazole      | 1mL vial (2mg)               | \$0.01   | eMIT |         | \$0.00  | TN | \$0.00028  | \$0.66592  |
| 19 | flucytosine      | 250mL infusion (2.5g)        | \$39.43  | BNF  |         |         |    | \$3.44262  | \$5.70584  |
| 20 | fludarabine      | vial (50mg)                  | \$30.46  | eMIT | \$48.33 | \$21.53 | TN |            |            |
| 21 | fluorouracil     | 5mL ampoule (250mg)          | \$0.60   | eMIT |         | \$0.10  | P  |            |            |
| 22 | fluphenazine     | 1mL ampoule (25mg)           | \$2.78   | eMIT | \$2.64  | \$0.36  | P  | \$0.05980  | \$0.35376  |
| 23 | fomepizole       | 1.5mL ampoule (1500mg)       |          |      |         |         |    | \$26.92838 | \$39.69204 |
| 24 | furosemide       | 2mL ampoule (20mg)           | \$0.12   | eMIT | \$0.08  | \$0.02  | TN | \$0.00075  | \$0.26730  |
| 25 | furosemide       | 2mL ampoule (20mg)           | \$0.12   | eMIT | \$0.08  | \$0.02  | TN | \$0.00075  | \$0.26730  |
| 26 | gemcitabine      | vial (200mg)                 | \$5.19   | eMIT | \$5.77  | \$0.99  | TN | \$0.87393  | \$1.94502  |
| 27 | gemcitabine      | vial (1000mg)                | \$40.16  | eMIT | \$23.23 | \$4.95  | TN | \$4.36964  | \$7.06309  |
| 28 | gentamicin       | 2mL vial (80mg)              | \$0.78   | eMIT | \$0.27  | \$0.04  | TN |            |            |
| 29 | gentamicin       | 2mL vial (20mg)              | \$1.43   | eMIT |         | \$0.04  | P  |            |            |
| 30 | glucagon         | 1mL injection (1mg)          | \$14.98  | BNF  | \$22.44 | \$1.72  | P  |            |            |
| 31 | haloperidol      | 1mL ampoule (5mg)            | \$1.40   | eMIT |         | \$0.03  | TN | \$0.00166  | \$0.26862  |
| 32 | haloperidol      | 1mL ampoule (5mg)            | \$1.40   | eMIT |         | \$0.03  | TN | \$0.00166  | \$0.26862  |
| 33 | haloperidol      | 1mL ampoule (5mg)            | \$1.40   | eMIT |         | \$0.03  | TN | \$0.00166  | \$0.26862  |
| 34 | heparin sodium   | 1mL ampoule (6.7mg)          | \$0.99   | eMIT | \$0.19  | \$0.02  | P  | \$0.08533  | \$0.39113  |
| 35 | heparin sodium   | 1mL ampoule (6.7mg)          | \$0.99   | eMIT | \$0.19  | \$0.02  | P  | \$0.08533  | \$0.39113  |
| 36 | heparin sodium   | 1mL ampoule (33.3mg)         | \$2.09   | eMIT | \$0.32  | \$0.15  | TN | \$0.42411  | \$0.88714  |
| 37 | heparin sodium   | 1mL ampoule (33.3mg)         | \$2.09   | eMIT | \$0.32  | \$0.15  | TN | \$0.42411  | \$0.88714  |
| 38 | heparin sodium   | 1mL ampoule (133.3mg)        |          |      |         |         |    | \$1.69772  | \$2.75183  |
| 39 | hydralazine      | powder for injection (20mg)  | \$2.88   | BNF  |         |         |    | \$0.00777  | \$0.27758  |
| 40 | hydrocortisone   | powder for injection (100mg) |          |      | \$0.90  | \$0.50  | P  | \$0.09166  | \$0.79970  |
| 41 | hydrocortisone   | powder for injection (100mg) |          |      | \$0.90  | \$0.50  | P  | \$0.09166  | \$0.79970  |
| 42 | hydroxocobalamin | 1mL ampoule (1mg)            | \$1.15   | eMIT |         |         |    |            |            |
| 43 | hyoscine         |                              |          |      |         |         |    |            |            |
| 44 | hydrobromide     | injection (400mcg)           | \$1.10   | eMIT |         |         |    | \$0.00159  | \$0.26853  |
| 45 | hyoscine         |                              |          |      |         |         |    |            |            |
| 46 | hydrobromide     | injection (600mcg)           | \$1.33   | eMIT |         |         |    | \$0.00239  | \$0.26969  |
| 47 | ibuprofen        | 1mL injection (5mg)          | \$46.80  | BNF  |         |         |    | \$0.00005  | \$0.66557  |
| 48 | ifosfamide       | powder for injection (500mg) | \$59.35  | BNF  | \$19.81 | \$1.22  | TN | \$0.65602  | \$1.62598  |
| 49 | ifosfamide       | powder for injection (1g)    | \$118.72 | BNF  | \$33.02 | \$2.44  | TN | \$1.31204  | \$2.58646  |
| 50 | ifosfamide       | powder for injection (2g)    | \$233.84 | BNF  | \$56.02 | \$4.89  | TN | \$2.62408  | \$4.50742  |

|    |                                      |                                         |          |      |         |          |    |            |            |
|----|--------------------------------------|-----------------------------------------|----------|------|---------|----------|----|------------|------------|
| 1  |                                      |                                         |          |      |         |          |    |            |            |
| 2  |                                      |                                         |          |      |         |          |    |            |            |
| 3  | imipenem + cilastatin                | powder for injection (250mg + 250mg)    |          |      | \$1.80  | \$8.93   | P  |            |            |
| 4  | imipenem + cilastatin                | powder for injection (500mg + 500mg)    | \$3.30   | eMIT | \$3.59  | \$12.45  | P  |            |            |
| 5  | insulin injection (soluble)          | 10mL injection (13.9mg)                 |          |      |         | \$0.83   | TN | \$0.46524  | \$1.34665  |
| 6  | insulin injection (soluble)          | 10mL injection (34.7mg)                 | \$9.72   | BNF  | \$2.10  | \$6.09   | P  | \$1.16309  | \$2.36838  |
| 7  | intermediate-acting insulin          | 10mL injection (13.9mg)                 |          |      |         | \$0.83   | TN |            |            |
| 8  | intermediate-acting insulin          | 10mL injection (34.7mg)                 | \$9.72   | BNF  | \$2.10  | \$4.40   | P  |            |            |
| 9  | irinotecan                           | 2mL vial (40mg)                         | \$5.58   | eMIT |         | \$11.25  | P  | \$0.17047  | \$0.91509  |
| 10 | irinotecan                           | 5mL vial (100mg)                        | \$143.81 | BNF  |         | \$22.50  | P  | \$0.42618  | \$1.28947  |
| 11 | irinotecan                           | 25mL vial (500mg)                       | \$46.83  | eMIT |         | \$112.50 | P  | \$2.13090  | \$3.78536  |
| 12 | kanamycin                            | powder for injection (1g)               |          |      |         | \$0.45   | P  |            |            |
| 13 | ketamine                             | 10mL vial (500mg)                       | \$9.10   | BNF  | \$2.64  | \$0.08   | P  | \$0.14269  | \$0.87441  |
| 14 | leuprorelin                          | pre-filled syringe (7.5mg)              | \$195.62 | BNF  |         | \$111.30 | P  | \$5.54227  | \$8.11444  |
| 15 | leuprorelin                          | pre-filled syringe (22.5mg)             | \$249.42 | BNF  |         | \$252.00 | P  | \$16.62682 | \$24.34333 |
| 16 | lidocaine                            | vial (20mg)                             | \$0.06   | BNF  | \$0.16  | \$0.00   | P  | \$0.00032  | \$0.66597  |
| 17 | lidocaine                            | vial (10mg)                             | \$0.05   | BNF  | \$0.46  | \$0.00   | P  | \$0.00016  | \$0.66574  |
| 18 | lidocaine                            | 2mL ampoule (100mg lidocaine + glucose) |          |      |         | \$0.06   | P  | \$0.00016  | \$0.26644  |
| 19 | lidocaine                            | 5mL ampoule (100mg)                     | \$0.26   | eMIT |         | \$0.02   | P  | \$0.00162  | \$0.26857  |
| 20 | lidocaine + epinephrine (adrenaline) | vial (10mg + 0.005mg)                   | \$0.13   | BNF  |         |          |    | \$0.00026  | \$0.66587  |
| 21 | lidocaine + epinephrine (adrenaline) | vial (20mg + 0.005mg)                   | \$0.12   | BNF  |         |          |    | \$0.00042  | \$0.66611  |
| 22 | linezolid                            | 300mL infusion bag (600mg)              | \$578.50 | BNF  | \$21.90 | \$3.47   | TN | \$0.41407  | \$0.60624  |
| 23 | lorazepam                            | 1mL ampoule (2mg)                       |          |      |         | \$0.06   | TN | \$0.00147  | \$0.26835  |
| 24 | lorazepam                            | 1mL ampoule (4mg)                       | \$0.46   | BNF  |         | \$0.23   | P  | \$0.00294  | \$0.27050  |
| 25 | magnesium sulfate                    | 2mL ampoule (1g)                        | \$0.42   | eMIT | \$0.31  | \$0.02   | TN | \$0.00267  | \$0.27011  |
| 26 | magnesium sulfate                    | 10mL ampoule (5g)                       | \$0.73   | eMIT | \$1.57  | \$0.09   | TN | \$0.01335  | \$0.28575  |
| 27 | mannitol                             | 1mL solution (100mg)                    | \$0.01   | BNF  |         | \$0.00   | P  | \$0.00069  | \$0.66651  |
| 28 | mannitol                             | 1mL solution (100mg)                    | \$0.01   | BNF  |         | \$0.00   | P  | \$0.00069  | \$0.66651  |
| 29 | mannitol                             | 1mL solution (200mg)                    | \$0.02   | BNF  | \$0.01  | \$0.01   | P  | \$0.00138  | \$0.66751  |
| 30 | mannitol                             | 1mL solution (200mg)                    | \$0.02   | BNF  | \$0.00  | \$0.01   | P  | \$0.00138  | \$0.66751  |
| 31 | medroxyprogesterone acetate          | 1mL vial (150mg)                        | \$7.81   | BNF  | \$0.49  | \$3.48   | P  |            |            |
| 32 | mesna                                | 4mL ampoule (400mg)                     | \$17.43  | BNF  | \$2.77  | \$0.37   | TN | \$0.26636  | \$0.65618  |
| 33 | mesna                                | 10mL ampoule (1000mg)                   | \$38.23  | BNF  |         | \$0.92   | TN | \$0.66591  | \$1.24116  |
| 34 | methotrexate                         | powder for injection (50mg)             | \$1.83   | eMIT | \$2.22  | \$0.28   | TN | \$4.04570  | \$6.58881  |
| 35 | methylprednisolone                   | 1mL vial (40mg)                         | \$1.79   | eMIT | \$1.38  | \$0.23   | P  | \$0.11323  | \$0.83128  |
| 36 | methylprednisolone                   | 1mL vial (80mg)                         |          |      |         | \$0.64   | P  | \$0.22647  | \$0.99707  |
| 37 | methylprednisolone                   | 5mL vial (200mg)                        |          |      |         |          |    | \$0.56616  | \$1.49442  |
| 38 | metoclopramide                       | 2mL ampoule (10mg)                      | \$0.15   | eMIT | \$0.13  | \$0.02   | TN | \$0.00086  | \$0.26746  |
| 39 |                                      |                                         |          |      |         |          |    |            |            |
| 40 |                                      |                                         |          |      |         |          |    |            |            |
| 41 |                                      |                                         |          |      |         |          |    |            |            |
| 42 |                                      |                                         |          |      |         |          |    |            |            |
| 43 |                                      |                                         |          |      |         |          |    |            |            |
| 44 |                                      |                                         |          |      |         |          |    |            |            |
| 45 |                                      |                                         |          |      |         |          |    |            |            |
| 46 |                                      |                                         |          |      |         |          |    |            |            |
| 47 |                                      |                                         |          |      |         |          |    |            |            |
| 48 |                                      |                                         |          |      |         |          |    |            |            |
| 49 |                                      |                                         |          |      |         |          |    |            |            |
| 50 |                                      |                                         |          |      |         |          |    |            |            |
| 51 |                                      |                                         |          |      |         |          |    |            |            |
| 52 |                                      |                                         |          |      |         |          |    |            |            |
| 53 |                                      |                                         |          |      |         |          |    |            |            |
| 54 |                                      |                                         |          |      |         |          |    |            |            |
| 55 |                                      |                                         |          |      |         |          |    |            |            |
| 56 |                                      |                                         |          |      |         |          |    |            |            |
| 57 |                                      |                                         |          |      |         |          |    |            |            |
| 58 |                                      |                                         |          |      |         |          |    |            |            |
| 59 |                                      |                                         |          |      |         |          |    |            |            |
| 60 |                                      |                                         |          |      |         |          |    |            |            |

|    |                                      |                              |          |      |         |         |    |            |            |
|----|--------------------------------------|------------------------------|----------|------|---------|---------|----|------------|------------|
| 1  |                                      |                              |          |      |         |         |    |            |            |
| 2  |                                      |                              |          |      |         |         |    |            |            |
| 3  |                                      |                              |          |      |         |         |    |            |            |
| 4  | metoclopramide                       | 2mL ampoule (10mg)           | \$0.15   | eMIT | \$0.13  | \$0.02  | TN | \$0.00086  | \$0.26746  |
| 5  | metronidazole                        | 100mL vial (500mg)           | \$0.47   | eMIT |         | \$0.09  | TN | \$0.00616  | \$0.67452  |
| 6  | metronidazole                        | 100mL vial (500mg)           | \$0.47   | eMIT |         | \$0.09  | TN | \$0.00616  | \$0.67452  |
| 7  | midazolam                            | 1mL injection (1mg)          | \$0.11   | eMIT | \$0.07  | \$0.03  | TN | \$0.00526  | \$0.67320  |
| 8  | midazolam                            | 1mL injection (1mg)          | \$0.11   | eMIT | \$0.07  | \$0.03  | TN | \$0.00526  | \$0.67320  |
| 9  | midazolam                            | 1mL injection (5mg)          | \$0.08   | eMIT | \$0.20  | \$0.10  | P  | \$0.02628  | \$0.70398  |
| 10 | morphine                             | 1mL ampoule (10mg)           | \$0.16   | eMIT | \$0.14  | \$0.11  | TN |            |            |
| 11 | morphine                             | 1mL ampoule (10mg)           | \$0.16   | eMIT | \$0.14  | \$0.11  | TN |            |            |
| 12 | naloxone                             | 1mL ampoule (400mcg)         | \$0.43   | eMIT | \$0.24  | \$1.04  | TN |            |            |
| 13 | neostigmine                          | 1mL ampoule (500mcg)         |          |      | \$0.29  | \$0.03  | TN | \$0.01352  | \$0.28599  |
| 14 | neostigmine                          | 1mL ampoule (2.5mg)          | \$0.53   | eMIT | \$0.17  | \$0.34  | P  | \$0.06758  | \$0.36514  |
| 15 | norethisterone enantate              | 1mL ampoule (200mg)          | \$5.27   | BNF  | \$0.83  | \$2.08  | P  |            |            |
| 16 | omeprazole                           | powder for injection (40mg)  | \$1.23   | eMIT |         | \$0.17  | TN | \$0.00055  | \$0.66630  |
| 17 | ondansetron                          | 2mL ampoule (4mg)            | \$0.11   | eMIT | \$0.34  | \$0.02  | TN | \$0.00445  | \$0.27272  |
| 18 | ondansetron                          | 2mL ampoule (4mg)            | \$0.11   | eMIT | \$0.34  | \$0.02  | TN | \$0.00445  | \$0.27272  |
| 19 | oxaliplatin                          | powder for injection (50mg)  | \$13.81  | eMIT | \$34.36 | \$3.26  | TN | \$3.19285  | \$5.34016  |
| 20 | oxaliplatin                          | powder for injection (100mg) | \$20.15  | eMIT | \$68.72 | \$6.52  | TN | \$6.38571  | \$10.01481 |
| 21 | oxaliplatin                          | 10mL vial (50mg)             | \$13.81  | eMIT | \$34.36 |         |    | \$3.19285  | \$5.34016  |
| 22 | oxaliplatin                          | 20mL vial (100mg)            | \$20.15  | eMIT | \$68.72 |         |    | \$6.38571  | \$10.01481 |
| 23 | oxaliplatin                          | 40mL vial (200mg)            | \$40.30  | eMIT |         |         |    | \$12.77141 | \$19.36413 |
| 24 | oxytocin                             | 1mL ampoule (25mcg)          | \$0.91   | eMIT | \$0.36  | \$0.10  | TN | \$0.00134  | \$0.26816  |
| 25 | paclitaxel                           | powder for injection (1mg)   | \$0.09   | eMIT | \$0.25  | \$0.04  | TN | \$0.04273  | \$0.72807  |
| 26 | pegylated interferon alfa (2a or 2b) | injection (180mcg)           | \$161.72 | BNF  |         | \$48.75 | TN |            |            |
| 27 | pegylated interferon alfa (2a or 2b) | injection (80mcg)            | \$138.24 | BNF  |         | \$41.09 | TN |            |            |
| 28 | pegylated interferon alfa (2a or 2b) | injection (100mcg)           | \$172.80 | BNF  |         | \$51.36 | TN |            |            |
| 29 | pentamidine                          | powder for injection (200mg) | \$27.54  | BNF  |         |         |    |            |            |
| 30 | phenobarbital                        | 1mL injection (200mg)        | \$7.32   | eMIT |         | \$0.21  | P  | \$0.01656  | \$0.29045  |
| 31 | phenytoin                            | 5mL vial (250mg)             | \$0.85   | eMIT | \$1.54  | \$0.10  | TN | \$0.00475  | \$0.67246  |
| 32 | phytomenadione                       | 5mL ampoule (50mg)           | \$2.46   | BNF  |         | \$0.38  | P  |            |            |
| 33 | procaine benzylpenicillin            | powder for injection (3g)    |          |      |         | \$0.51  | P  |            |            |
| 34 | propofol                             | 1mL injection (20mg)         | \$0.05   | eMIT |         | \$0.18  | P  | \$0.00226  | \$0.66880  |
| 35 | propofol                             | 1mL injection (10mg)         | \$0.03   | eMIT | \$0.02  | \$0.04  | TN | \$0.00113  | \$0.66715  |
| 36 | protamine sulfate                    | 5mL ampoule (50mg)           | \$6.44   | BNF  | \$4.69  | \$0.09  | P  |            |            |
| 37 | protamine sulfate                    | 5mL ampoule (50mg)           | \$6.44   | BNF  | \$4.69  | \$0.09  | P  |            |            |
| 38 | quinine                              | 2mL ampoule (600mg)          |          |      | \$1.27  | \$0.12  | P  | \$0.07719  | \$0.37922  |
| 39 | ranitidine                           | 2mL ampoule (50mg)           | \$0.48   | eMIT | \$0.56  | \$0.02  | TN | \$0.00105  | \$0.26774  |
| 40 | ribavirin                            | 10mL solution (800mg)        |          |      |         |         |    | \$0.09776  | \$0.80863  |
| 41 | ribavirin                            | 10mL solution (1g)           |          |      |         |         |    | \$0.12220  | \$0.84442  |
| 42 | ribavirin                            | 10mL solution (800mg)        |          |      |         |         |    | \$0.09776  | \$0.80863  |
| 43 | ribavirin                            | 10mL solution (1g)           |          |      |         |         |    | \$0.12220  | \$0.84442  |
| 44 |                                      |                              |          |      |         |         |    |            |            |
| 45 |                                      |                              |          |      |         |         |    |            |            |
| 46 |                                      |                              |          |      |         |         |    |            |            |
| 47 |                                      |                              |          |      |         |         |    |            |            |
| 48 |                                      |                              |          |      |         |         |    |            |            |
| 49 |                                      |                              |          |      |         |         |    |            |            |
| 50 |                                      |                              |          |      |         |         |    |            |            |
| 51 |                                      |                              |          |      |         |         |    |            |            |
| 52 |                                      |                              |          |      |         |         |    |            |            |
| 53 |                                      |                              |          |      |         |         |    |            |            |
| 54 |                                      |                              |          |      |         |         |    |            |            |
| 55 |                                      |                              |          |      |         |         |    |            |            |
| 56 |                                      |                              |          |      |         |         |    |            |            |
| 57 |                                      |                              |          |      |         |         |    |            |            |
| 58 |                                      |                              |          |      |         |         |    |            |            |
| 59 |                                      |                              |          |      |         |         |    |            |            |
| 60 |                                      |                              |          |      |         |         |    |            |            |

|    |                                  |                               |            |      |          |          |    |             |             |
|----|----------------------------------|-------------------------------|------------|------|----------|----------|----|-------------|-------------|
| 1  |                                  |                               |            |      |          |          |    |             |             |
| 2  |                                  |                               |            |      |          |          |    |             |             |
| 3  |                                  |                               |            |      |          |          |    |             |             |
| 4  | rituximab                        | 50mL vial (500mg)             | \$1,135.10 | BNF  | \$596.25 |          |    | \$336.88802 | \$493.90325 |
| 5  | rituximab                        | 10mL vial (100mg)             | \$227.01   | BNF  | \$119.25 |          |    | \$67.37760  | \$99.31305  |
| 6  | salbutamol                       | 5mL ampoule (50mcg)           |            |      |          |          |    | \$0.00001   | \$0.26621   |
| 7  | sodium calcium edetate           | 5mL ampoule (1000mg)          |            |      |          |          |    | \$0.00334   | \$0.27109   |
| 8  | sodium nitrite                   | 10mL ampoule (300mg)          |            |      |          |          |    | \$0.00038   | \$0.26675   |
| 9  | sodium nitroprusside             | powder for injection (50mg)   |            |      |          | \$0.68   | P  | \$0.00784   | \$0.27768   |
| 10 | sodium stibogluconate            | 30mL vial (3g)                | \$25.91    | BNF  |          |          |    |             |             |
| 11 | sodium thiosulfate               | 50mL ampoule (12500mg)        |            |      |          |          |    | \$0.02574   | \$0.30388   |
| 12 | spectinomycin                    | powder for injection (2g)     |            |      |          | \$3.00   | P  |             |             |
| 13 | streptokinase                    | powder for injection (15.6mg) | \$101.97   | eMIT | \$257.52 | \$3.83   | P  | \$14.27110  | \$21.55982  |
| 14 | streptomycin                     | powder for injection (1000mg) |            |      | \$0.34   | \$0.06   | P  |             |             |
| 15 | streptomycin                     | powder for injection (1000mg) |            |      | \$0.34   | \$0.06   | P  |             |             |
| 16 | sulfamethoxazole + trimethoprim  | 5mL ampoule (400mg+80mg)      | \$2.31     | BNF  |          |          |    | \$0.00659   | \$0.27584   |
| 17 | sulfamethoxazole + trimethoprim  | 10mL ampoule (800mg+160mg)    | \$4.62     | BNF  |          |          |    | \$0.01317   | \$0.28548   |
| 18 | sulfamethoxazole + trimethoprim  | 5mL ampoule (400mg+80mg)      | \$2.31     | BNF  |          |          |    | \$0.00659   | \$0.27584   |
| 19 | sulfamethoxazole + trimethoprim  | 10mL ampoule (800mg+160mg)    | \$4.62     | BNF  |          |          |    | \$0.01317   | \$0.28548   |
| 20 | suramin sodium                   | powder for injection (1g)     |            |      |          |          |    |             |             |
| 21 | suxamethonium                    | 2mL ampoule (100mg)           | \$0.86     | eMIT |          | \$0.13   | P  | \$0.05053   | \$0.34017   |
| 22 | suxamethonium                    | 0                             |            |      |          |          |    | \$0.00000   | \$0.66550   |
| 23 | testosterone                     | 1mL ampoule (200mg)           |            |      |          | \$1.41   | P  | \$0.02237   | \$0.29896   |
| 24 | tranexamic acid                  | 10mL ampoule (1000mg)         | \$3.90     | BNF  | \$9.74   | \$0.57   | P  | \$0.09442   | \$0.40444   |
| 25 | trastuzumab                      | powder for injection (150mg)  | \$529.62   | BNF  |          |          |    |             |             |
| 26 | valproic acid (sodium valproate) | 4mL ampoule (400mg)           | \$5.09     | eMIT |          | \$1.20   | P  | \$0.01051   | \$0.28159   |
| 27 | valproic acid (sodium valproate) | 10mL ampoule (1g)             |            |      |          | \$3.00   | P  | \$0.02628   | \$0.30468   |
| 28 | vancomycin                       | powder for injection (250mg)  | \$0.72     | eMIT | \$1.01   | \$0.30   | TN | \$0.22748   | \$0.99855   |
| 29 | vecuronium                       | powder for injection (10mg)   | \$4.38     | BNF  |          | \$1.10   | TN |             |             |
| 30 | vecuronium                       | powder for injection (10mg)   | \$4.38     | BNF  |          | \$1.10   | TN |             |             |
| 31 | verapamil                        | 2mL ampoule (5mg)             | \$1.41     | BNF  |          |          |    | \$0.00039   | \$0.26677   |
| 32 | vinblastine                      | powder for injection (10mg)   | \$19.27    | eMIT | \$7.13   | \$1.80   | TN | \$2.57796   | \$4.43989   |
| 33 | vincristine                      | powder for injection (1mg)    | \$4.08     | eMIT | \$3.20   | \$0.05   | TN | \$0.53274   | \$1.44549   |
| 34 | vincristine                      | powder for injection (5mg)    | \$23.43    | eMIT | \$16.00  | \$0.25   | TN | \$2.66370   | \$4.56543   |
| 35 | vinorelbine                      | 1mL vial (10mg)               | \$6.23     | eMIT | \$7.78   | \$38.63  | P  |             |             |
| 36 | vinorelbine                      | 5mL vial (50mg)               | \$23.41    | eMIT | \$38.65  | \$160.26 | P  |             |             |
| 37 | zidovudine (ZDV or AZT)          | 20mL vial (200mg)             | \$11.60    | BNF  |          | \$0.21   | P  | \$0.05046   | \$0.73938   |
| 38 |                                  |                               |            |      |          |          |    |             |             |
| 39 |                                  |                               |            |      |          |          |    |             |             |
| 40 |                                  |                               |            |      |          |          |    |             |             |
| 41 |                                  |                               |            |      |          |          |    |             |             |
| 42 |                                  |                               |            |      |          |          |    |             |             |
| 43 |                                  |                               |            |      |          |          |    |             |             |
| 44 |                                  |                               |            |      |          |          |    |             |             |
| 45 |                                  |                               |            |      |          |          |    |             |             |
| 46 |                                  |                               |            |      |          |          |    |             |             |
| 47 |                                  |                               |            |      |          |          |    |             |             |
| 48 |                                  |                               |            |      |          |          |    |             |             |
| 49 |                                  |                               |            |      |          |          |    |             |             |
| 50 |                                  |                               |            |      |          |          |    |             |             |
| 51 |                                  |                               |            |      |          |          |    |             |             |
| 52 |                                  |                               |            |      |          |          |    |             |             |
| 53 |                                  |                               |            |      |          |          |    |             |             |
| 54 |                                  |                               |            |      |          |          |    |             |             |
| 55 |                                  |                               |            |      |          |          |    |             |             |
| 56 |                                  |                               |            |      |          |          |    |             |             |
| 57 |                                  |                               |            |      |          |          |    |             |             |
| 58 |                                  |                               |            |      |          |          |    |             |             |
| 59 |                                  |                               |            |      |          |          |    |             |             |
| 60 |                                  |                               |            |      |          |          |    |             |             |

eMIT – price source was the electronic market information tool, available from <https://www.gov.uk/government/publications/drugs-and-pharmaceutical-electronic-market-information-emit>

1  
2  
3 BNF – price source was the British National Formulary, available from

4 <https://bnf.nice.org.uk/>

5  
6 TN – price source was the database of the Tamil Nadu Medical Services Corporation,  
7 available from

8 [http://www.tnmsc.com/tnmsc/new/user\\_pages/drugtender.php?drugcat=drug2017](http://www.tnmsc.com/tnmsc/new/user_pages/drugtender.php?drugcat=drug2017) and

9 [http://www.tnmsc.com/tnmsc/new/user\\_pages/drugtender.php?drugcat=sdg2017](http://www.tnmsc.com/tnmsc/new/user_pages/drugtender.php?drugcat=sdg2017)

10 P – price source was the MedGuide India database, available from

11 <http://www.medguideindia.com/>

12  
13  
14 Prices in South Africa were collected from the South Africa Department of Health Master  
15 Procurement Catalogue. Available from

16 <http://www.health.gov.za/index.php/component/phocadownload/category/196> (accessed  
17 May 12, 2017).  
18  
19  
20  
21  
22  
23  
24  
25  
26  
27  
28  
29  
30  
31  
32  
33  
34  
35  
36  
37  
38  
39  
40  
41  
42  
43  
44  
45  
46  
47  
48  
49  
50  
51  
52  
53  
54  
55  
56  
57  
58  
59  
60



1  
2  
3 **Exchange rates**  
4

5 Exchange rates used were 1 INR = 0.015 USD, 1 GBP = 1.3 USD, 1 ZAR = 0.075 USD.  
6  
7  
8  
9  
10  
11  
12  
13  
14  
15  
16  
17  
18  
19  
20  
21  
22  
23  
24  
25  
26  
27  
28  
29  
30  
31  
32  
33  
34  
35  
36  
37  
38  
39  
40  
41  
42  
43  
44  
45  
46  
47  
48  
49  
50  
51  
52  
53  
54  
55  
56  
57  
58  
59  
60

For peer review only

# BMJ Open

## Estimation of cost-based prices for injectable medicines in the WHO Essential Medicines List

|                                 |                                                                                                                                                           |
|---------------------------------|-----------------------------------------------------------------------------------------------------------------------------------------------------------|
| Journal:                        | <i>BMJ Open</i>                                                                                                                                           |
| Manuscript ID                   | bmjopen-2018-027780.R1                                                                                                                                    |
| Article Type:                   | Original research                                                                                                                                         |
| Date Submitted by the Author:   | 16-Jul-2019                                                                                                                                               |
| Complete List of Authors:       | Gotham, Dzintars; Independent Barber, Melissa; Harvard University, Harvard T.H. Chan School of Public Health<br>Hill, Andrew; University of Liverpool, UK |
| <b>Primary Subject Heading</b>: | Health economics                                                                                                                                          |
| Secondary Subject Heading:      | Public health, Pharmacology and therapeutics, Geriatric medicine, Health policy                                                                           |
| Keywords:                       | PUBLIC HEALTH, pharmaceuticals, access to medicines, access to healthcare, global health, generic medicines                                               |
|                                 |                                                                                                                                                           |

SCHOLARONE™  
Manuscripts

## Estimation of cost-based prices for injectable medicines in the WHO Essential Medicines List

**Authors:** Dzintars Gotham MBBS<sup>1</sup>, Melissa J Barber MPhil<sup>2</sup>, Andrew M Hill PhD<sup>3</sup>

1. Independent, London, UK

2. Department of Translational Medicine, University of Liverpool, UK

3. Harvard T.H. Chan School of Public Health, Harvard University, Boston, MA, USA

### Addresses of authors

Dr Dzintars Gotham MBBS BSc(Hons)  
Independent  
London, UK  
Email: dzintarsgotham@gmail.com  
Telephone: +44-7751-051-852

Melissa J Barber MPhil  
Harvard T.H. Chan School of Public Health  
Boston, Massachusetts, USA

Dr Andrew M Hill PhD  
Department of Translational Medicine,  
University of Liverpool,  
70 Pembroke Place, Liverpool L69 3GF, United Kingdom

### Corresponding author:

Dr Dzintars Gotham MBBS BSc(Hons)  
Independent  
London, UK  
Email: dzintarsgotham@gmail.com  
Telephone: +44-7751-051-852

**Word count:** main text 3730, abstract 271

**Key words:** essential medicines; generics; cost of production; health economics; health systems

## ABSTRACT

### objectives

Challenges remain in ensuring universal access to affordable essential medicines. We previously estimated the expected generic prices based on cost of production for medicines in solid oral formulations (i.e. capsules or tablets) on the World Health Organization Model List of Essential Medicines (EML). The objectives of this analysis were to estimate cost-based prices for injectable medicines on the EML and to compare these to lowest current prices in England, South Africa, and India.

### design

Data on the cost of active pharmaceutical ingredients (API) exported from India were extracted from an online database of customs declarations ([www.infodriveindia.com](http://www.infodriveindia.com)). A formula was designed to use API price data to estimate a cost-based price, by adding the costs of converting API to a finished pharmaceutical product, including the cost of formulation in vials or ampoules, transportation, and an average profit margin.

### results

For injectable formulations on the WHO EML, medicines had prices above the estimated cost-based price in 77% of comparisons in England (median ratio 2.54), and 62% in South Africa (median ratio 1.48), while 85% of medicines in India were below estimated cost-based price (median ratio 0.30). 19% of injectable medicines in England, 9% in South Africa, and 5% in India had prices more than 10 times the estimated cost-based price. Medicines that appeared in the top 20 by ratio of lowest current price to estimated cost-based price for more than one country included numerous oncology medicines – irinotecan, leuprorelin, ifosfamide, daunorubicin, filgrastim, and mesna – as well as valproic acid and ciclosporin.

### conclusions

Estimating manufacturing costs can identify cases in which profit margins for medicines may be set significantly higher than average.

### Strengths and limitations of this study

- The cost assumptions used to estimate cost-based prices were conservative (strength)
- The key input of active pharmaceutical ingredient price was based on average prices of actual, completed sales of active pharmaceutical ingredient (strength)
- Apart from the individual active pharmaceutical ingredient price data, the costing formula was adjusted only for formulation as vial or ampoule, but not for other characteristics such as volume (limitation)
- We did not estimate demand volumes and did not adjust price estimates based on demand volume (limitation)

For peer review only

## INTRODUCTION

There are persistent challenges in ensuring access to affordable essential medicines in low-and middle-income countries (LMICs).[1] The World Health Organization's Model List of Essential Medicines (EML) comprises medicines that meet the priority health needs of global populations and should be available at all times, at affordable prices.[2] A previous analysis estimated the cost of production for solid oral formulations in the EML, finding sizeable differences between cost of manufacture and current prices in England, South Africa, and India.[3]

A number of differences between solid oral formulations and injectable formulations could be expected to affect manufacturing costs, such as significantly higher requirements for manufacturing sites to maintain product sterility for intravenous and intramuscular formulations. Other factors may influence market dynamics for individual products – for example, the majority of injectable products are likely, in general, to be used in healthcare institutions and for more severe illness than most other formulations.

While many cases of difficulties in accessing treatment are associated with patent-protected medicines, in some cases, generic medicines may also be priced at very high levels, such as in the recent cases involving manufacturers Pfizer, Flynn, and Aspen in England. In these cases, manufacturers dramatically increased prices of generic medicines, arguably taking advantage of a dominant position they held in the respective markets.[4,5]

We aimed to develop an algorithm for estimating the cost of manufacture for injectable medicines on the WHO EML, to use this algorithm to estimate prices that would be expected assuming an average profit margin, and to compare these estimated cost-based prices to current prices in England, South Africa, and India. Estimation of cost-based generic prices can contribute to procurement, among other things, by informing negotiations, tenders, price control mechanisms, and competition policy.

## METHODS

In our earlier analysis of solid oral formulations (SOF), we developed a costing formula that accounted for capital expenses, the cost of excipients, and the cost of formulation into tablets.[3] We have also previously developed a costing formula for biosimilars of insulin formulated in vials.[6]

Here, we developed a similar formula for injectable medicines, and submitted data on the cost of active pharmaceutical ingredients (API) to the formula to generate cost-based estimated generic prices. We then compared these estimated prices to current market prices in three countries – England, South Africa, and India. We assume manufacturing in India both because of the fact that India is a major manufacturer of generics globally, and due to the greater availability of data on the bulk prices of active pharmaceutical ingredient (see below) in India compared to other countries.

### **medicines included in the analysis**

We analysed medicines listed in the 2015 WHO EML as injectable formulations.[7] We use the term ‘item’ to describe an individual medicine-formulation-dosage listing. Besides SOF, we further excluded certain categories of medicines, due both to limitations in reliably identifying active pharmaceutical ingredient data and/or were we considered that the market would be a special case (e.g. blood products). These categories included blood products, diagnostic agents, antivenom, vaccines, simple water-based solutions (e.g. 0.9% sodium chloride), and vitamins and minerals, as well as infusion bag formulations and pre-filled syringe formulations. A full list of included and excluded medicines/formulations is available in the appendix.

### **cost of active pharmaceutical ingredient**

Data on active pharmaceutical ingredient exported from India were retrieved from an online database of customs declarations ([www.infodriveindia.com](http://www.infodriveindia.com)), a source that we have used in numerous previous analyses of manufacturing costs.[3,6,8–12] Active pharmaceutical ingredient shipments in the date range 1 July 2014 to 1 July 2016 were included, extending the range 2 years into the past if <100 records were returned, and repeating this until at least 100 records were available, or until the timeframe spanned 6 years.

1  
2  
3 API data were manually cleaned to remove entries that did not represent genuine active  
4 pharmaceutical ingredient (e.g. shipments of finished pharmaceutical product; see appendix for  
5 details), after which a linear regression model, weighted by size in kilograms of individual shipments,  
6 was applied to estimate an average active pharmaceutical ingredient price per kilogram at the data  
7 cut-off date (November 2016)(see appendix for an example).  
8  
9  
10  
11  
12

13 For some medicines, dosage is expressed as the dose of the active molecule, while the active  
14 pharmaceutical ingredient is sold as a salt form (e.g. one vial of '80mg methylprednisolone' contains  
15 106mg of methylprednisolone sodium succinate). We adjusted the cost of active pharmaceutical  
16 ingredient needed per unit accordingly.  
17  
18  
19  
20  
21

22 Statistical analyses of active pharmaceutical ingredient export data were done in Stata/IC V.14.0 for  
23 Mac.  
24

#### 25 **cost of manufacture of injectables**

26  
27

28 We have previously estimated cost-based prices that could be achieved in a competitive market for  
29 various solid oral formulation medicines,[3,8–12] as well as for insulins.[6] We divide the  
30 manufacturing cost estimation into four parts: the cost of active pharmaceutical ingredient, the cost  
31 of converting the active pharmaceutical ingredient into a finished pharmaceutical product , and  
32 operating expenditures including a profit margin. The cost estimation formula is given in Figure 1  
33 and explained further below.  
34  
35  
36  
37  
38  
39

40 The cost of active pharmaceutical ingredient per dose was calculated as described earlier.  
41  
42

43 The cost of converting active pharmaceutical ingredient into an finished pharmaceutical product  
44 includes the cost of constructing and operating manufacture sites, raw materials such as glass vials,  
45 and process wastage (i.e. the proportion of the active pharmaceutical ingredient that is wasted in  
46 the process of formulating it into an finished pharmaceutical product). In general, we aimed to use  
47 conservative (high) assumptions in estimating the cost of production. In other words, in designing  
48 our costing model, we erred on the side of overestimating the cost of production, in preference to  
49 underestimating it. This has the effect of minimising the observed difference in price between  
50 current prices and estimated cost-based generic prices, where the former is greater than the latter.  
51  
52  
53  
54  
55  
56  
57  
58  
59  
60



1  
2  
3 Injectable items in the EML divide broadly into those for which the designated formulation is an  
4 ampoule, and those for which the designated formulation is a vial. In some cases, the EML does not  
5 indicate whether formulation is as a vial or ampoule – for these items we assumed one or the other  
6 based on the more prevalent form found across England, South Africa, and India. Ampoules are  
7 sealed glass containers, while vials generally have a removable cap. Assumptions on whether the  
8 medicine is formulated as a vial or ampoule were made for 23% of items.  
9  
10  
11  
12

13  
14  
15 To design conservative assumptions for ampoule/vial formulation costs, we reviewed the lowest-  
16 priced products formulated as vials or ampoules in the eMIT database (see next section). These  
17 lowest prices are around US\$0.20 for ampoules and US\$0.50 for vials (appendix). We used these  
18 values as assumed formulation costs. These are, of course, conservative assumptions, as for those  
19 products active pharmaceutical ingredient costs and operating margins (and transportation costs,  
20 taxes, etc.) would have to be zero for the price to represent formulation alone. This is reflected in a  
21 recent analysis of the cost of manufacture of vaccines, which estimated the cost of sterile  
22 formulation as an ampoule to be around \$0.12/unit, and as a vial to be around US\$0.35/unit, with  
23 these values including raw materials (i.e. the vial or ampoule itself), labour, facility and equipment  
24 costs, and overheads.[13] It is worth noting that Indian government standards on pharmaceutical  
25 manufacturing costs, previously used to inform price ceilings, set allowable costs at a substantially  
26 lower level: ampoule costs at \$0.03-0.13 and vial costs at \$0.05-0.21 (ranges depending on size and  
27 type)(appendix).  
28  
29  
30  
31  
32  
33  
34  
35  
36  
37

38 We assumed that 10% more active pharmaceutical ingredient is needed than the stated dosage, to  
39 account for loss of active pharmaceutical ingredient in the vial/ampoule filling process and  
40 vial/ampoule overfill.  
41  
42  
43  
44

45 We assumed a net profit margin of 10% (the average operating margin in the US was 12% in  
46 2013).[14]  
47  
48  
49

50 Though these cost components are highly variable between countries, an analysis by IMS Health  
51 found that costs associated with import (transport, tariffs, other charges) were around 5% in most of  
52 the countries surveyed (e.g. Brazil, India, Russia)..[15] Based on this, we added a 10% margin for  
53 transportation costs as a conservative assumption..  
54  
55  
56  
57

58 **prices in England, South Africa, and India**  
59  
60

1  
2  
3  
4  
5 Prices were collected in December 2016. Exchange rates used are given in the appendix.  
6  
7

8 For England, prices were collected from the British National Formulary (BNF) and the electronic  
9 market information tool (eMit). The BNF lists 'indicative prices' and is a reference used by clinicians  
10 and pharmacists. eMit provides actual government-purchase prices. The lowest price available  
11 across the two sources was used. For South Africa, prices were collected from a database of prices in  
12 the public healthcare system as well as a database of prices in the private market, both published by  
13 the Department of Health. The lowest price available across the two sources was used. For India,  
14 prices reported in public tenders of the state of Tamil Nadu were used. Where prices were not  
15 available in this source, we used the price reported in an online database of Indian Maximum Retail  
16 Prices. Details on price sources are available in the appendix. For South Africa and India, the  
17 medicine prices in the sources were assumed to include 15% and 5% value-added tax (VAT),  
18 respectively, and price data was adjusted accordingly to be net of VAT. For England, the medicine  
19 prices in the sources do not include VAT.  
20  
21  
22  
23  
24  
25  
26  
27  
28  
29

30 For many medicines in the EML, multiple dosages are listed, and may be interchangeable by using a  
31 larger number of smaller-dose items in the place of a larger item, or vice-versa. Individual countries  
32 may procure larger some volumes of one dosage, but not the other, potentially leading to one  
33 dosage having a far higher price than would be expected, due to lower demand volume. To avoid  
34 misleading findings as a result of this, for each formulation of each medicine, comparisons between  
35 countries and between market prices and cost-based price estimates (for injectables) or active  
36 pharmaceutical ingredient cost (for other formulations) were made for the dosage that gave the  
37 lowest difference. As an example, for an injection that is listed in 500mg and 1000mg forms,  
38 England-South Africa price ratio was recorded as the lower between the two dosage forms. Within  
39 the context of our analysis this is a conservative approach (yielding smaller differences in  
40 comparisons).  
41  
42  
43  
44  
45  
46  
47  
48  
49

#### 50 **patient and public involvement**

51 The conduct of this study did not involve patients or the public. This study is based on exclusively on  
52 publicly available export, price, and trade data. Ethical board review was therefore not needed.  
53  
54  
55  
56  
57  
58  
59  
60

## RESULTS

Of 414 unique medicines (including combinations) on the 2015 EML, 145 fit the inclusion criteria of this analysis. Active pharmaceutical ingredient data were available for 96 of these 145 medicines (66%)(an example of these data for a single medicine is illustrated in Appendix Figure A1).

### **estimated cost-based prices**

Estimated cost-based prices ranged from \$0.24 (salbutamol 50mcg) to \$449 (rituximab 500mg).

The comparison of lowest current prices in England, South Africa, and India to estimated cost-based prices for injectable items is shown in Table 1 and Figure 2. The majority of injectable items had prices significantly above the estimated cost-based prices in England and South Africa, however, in India, 88% of injectable items had prices below the estimated cost-based price.

The items with the highest ratios of lowest current price to estimated cost-based price are shown for England in Table 2, for South Africa in Table 3, and for India in Table 4.

Therapeutic categories with notably higher ratios of lowest current price to estimated cost-based price included cardiovascular medicines, medicines for mental and behavioural disorders, hormones, other endocrine medicines and contraceptives, anticonvulsants/antiepileptics, antineoplastics and immunosuppressives, and oxytocics (appendix).

### **International price comparisons**

International comparisons of lowest current prices for injectable essential medicines are shown in Figure 3. Prices were higher in England than in South Africa in 60% of comparisons, with a median ratio of 1.44; higher in England than in India in 91% of comparisons, with a median ratio of 7.08; and higher in South Africa than in India in 84% of comparisons, with a median ratio of 3.69 (Figure 3).

## DISCUSSION

For injectable formulations on the WHO EML, 77% of medicines had prices above the estimated cost-based price in England, and 62% has prices above the estimated cost-based price in South Africa, while 85% of medicines in India were below estimated cost-based price. 19% of injectable medicines in England, 9% in South Africa, and 5% in India had prices more than 10 times the estimated cost-based price (Table 1, Figure 2).

A few medicines were notable for appearing in the top-20 lists by ratio of current price to estimated cost-based price in more than one country (Tables 2–4): numerous oncology medicines – irinotecan, ifosfamide, daunorubicin, filgrastim, and mesna – as well as the certain antimicrobials (ampicillin, acyclovir, quinine), valproic acid (an anti-epileptic) and ciclosporin (an immunosuppressant).

A wide range of market factors may contribute to the greater than average difference in manufacture costs and price. The ‘top 20’ injectable medicines are all mostly used in the in-patient hospital setting, are used in specialist treatments, are second/third-line treatments, and/or are used for short durations. These characteristics would all tend to reduce demand volumes, reduce economies of scale (both in manufacture and distribution), and reduce the buyer’s negotiating power, and may thus explain the high prices relative to manufacture costs.

Differences between countries in the ratios of lowest current price to estimated cost-based generic price, similarly, may be explained by a wide range of factors. A detailed comparison of pharmaceutical market characteristics of the three countries is beyond the scope of the study. India is a substantially larger market than England and South Africa, and this difference in volume of demand may play a role. Differences in regulatory requirements are also likely to play a significant role. India has a large local generic manufacturing sector. Lastly, there may be a comparatively greater emphasis on these ‘essential’ products in South Africa and India compared to England, as there is in general a lesser range of products available for use, for most patients in these countries. Lastly, some of the higher-cost drugs for which prices were identified for England were not found in the Indian databases, which leads to a degree of ‘selection bias’, wherein for the India comparison, a higher proportion of available datapoints are for lower-cost drugs than for the UK.

Most of all of the medicines compared in this analysis are no longer under patent protection in England, South Africa, or India.[16] Varying levels of competition across products and countries may

1  
2  
3 also influence prices. This analysis does not account for differing volumes related to market size and  
4 related efficiencies. In many or most cases, we would not expect low competition to be a driving  
5 factor behind high prices, given the robust generics markets in England, South Africa, and India, as  
6 well as the 'essential' nature of included medicines. However, in some cases, high prices for generic  
7 medicines may be explained by anti-competitive practices, or price hikes where a single supplier  
8 controls the market. This analysis is unable to detect the presence of anticompetitive strategies  
9 which may raise prices such as price fixing or upstream consolidation or collusion. The extent of  
10 these practices is unknown, but, as this year's lawsuit brought by 44 state Attorney Generals in the  
11 US against 20 generics manufacturers demonstrates, anticompetitive practices may be prevalent in  
12 certain pharmaceutical markets.[17]  
13  
14  
15  
16  
17  
18  
19  
20  
21

22 Given the range of medicines included, it is difficult to make generalised comments. If cost of  
23 manufacture analysis were employed by governments to evaluate prices, large differences between  
24 current prices and estimated cost-based prices could trigger closer examination on a case-by-case  
25 basis. For example, linezolid is recently off-patent, and is used as a 'last-resort' antibiotic,[18]  
26 limiting demand volume. Some EML medicines, such as filgrastim , which appears in the 'top 20' in  
27 all three countries , are biologics, meaning different regulations and higher regulatory expenses may  
28 apply. In such cases, large profit margins may be more acceptable. In other cases, such as ibuprofen  
29 (5mg in 1mL injection) and ampicillin (1000mg powder for injection) in England may reflect  
30 insufficient competition, inefficient procurement, or a less commonly used dosage form (Table 2).  
31 Some of these 'top 20' medicines may represent a substantial burden on healthcare expenditures –  
32 for example, irinotecan represented expenditures of £22 million (about US\$29 million) by the public  
33 healthcare system in England in 2016/2017.[19]  
34  
35  
36  
37  
38  
39  
40  
41

42 Current lowest prices in India were on average lower than our estimated cost-based prices (lowest  
43 current prices in India were median 27% of the estimated cost-based price; Table 1 and Figure 2).  
44 This may reflect conservative assumptions made for the cost of ampoules and vials; a substantial  
45 number of items cost less than our assumed raw material cost for the ampoule/vial (primary  
46 packaging) alone, which we based on prices in high-income countries (see Figure A2 in the  
47 Appendix). It may also reflect the general conservative (overestimating) effect of using data on  
48 exported active pharmaceutical ingredient; active pharmaceutical ingredient that is manufactured  
49 in-house or procured domestically may have lower prices. The use of an average active  
50 pharmaceutical ingredient price (rather than, for example, lowest observed or first-quartile) means,  
51 in most cases, that a number of active pharmaceutical ingredient sales occurred at lower price  
52 points. Lastly, Indian prices were collected from two databases – one representing the private  
53  
54  
55  
56  
57  
58  
59  
60

1  
2  
3 market and one representing Tamil Nadu state tenders (the lower price of the two was recorded).  
4  
5 State tender prices are likely lower than private market prices, but the majority of health  
6  
7 expenditures in India are out-of-pocket, and of these the majority are on medicines.[20] In addition,  
8  
9 there are wide variations in wealth and access to health insurance between Indian states. The  
10  
11 methodological approach of seeking the lowest available price in each country means that the price  
12  
13 faced by patients when paying out-of-pocket in the private market may be considerably higher.

14  
15 In our earlier analysis of solid oral form medicines in the EML, we found that 77% comparable prices  
16  
17 in England, 67% comparable prices in South Africa and 40% comparable prices in India were above  
18  
19 the estimated cost-based price. Median ratios for lowest current price to estimated cost-base price  
20  
21 were 2.7x in England, 1.4x in South Africa, and 0.6x in India.[3] These ratios are notably similar to the  
22  
23 comparisons in this analysis between lowest current prices and estimated cost-based prices for  
24  
25 injectables (2.5x in England, 1.5x in South Africa, 0.3x in India; Table 1).

26  
27 Analysis of the cost of production of medicines can be used in government price negotiations, price  
28  
29 control mechanisms, or in competition law contexts. In India, until 2013, a formula based on the cost  
30  
31 of manufacture was used to set ceiling prices on key medicines.[21,22] A similar approach is or has  
32  
33 been used in Bangladesh, Pakistan, and China.[22] In South African tenders, manufacturers are  
34  
35 required to submit breakdowns of their price by various cost components including active  
36  
37 pharmaceutical ingredient cost and profit margin.[23] The WHO Guideline on Pharmaceutical Pricing  
38  
39 Policies notes that the use of cost-plus formulae may be challenging to implement due to challenges  
40  
41 on obtaining accurate data on material prices on manufacturing costs, and due to the potential for  
42  
43 manipulation of data by manufacturers to exaggerate costs and justify higher prices.[22] Indeed, in  
44  
45 this analysis, the Indian government requirement for the publication of customs data on the value of  
46  
47 exported active pharmaceutical ingredient has been revoked since we collected data, meaning that  
48  
49 at present the authors are not aware of an alternative, affordable source of data for active  
50  
51 pharmaceutical ingredient costs.[24] Nevertheless, cost of manufacture analysis should be explored  
52  
53 further as a component of pricing policies.

54  
55 Pricing policies linked to manufacturer costs would also need to be use alongside policies to prevent  
56  
57 shortages and stock-outs.[25] Indeed, some of the therapeutic groups identified in this analysis as in  
58  
59 many cases high differences between market prices and estimated cost-based prices, such as  
60  
61 chemotherapy medicines and antibiotics, may also be groups that are vulnerable to  
62  
63 shortages.[26,27]

1  
2  
3  
4  
5 This study, which used broad and conservative assumptions, can be seen as an initial exploration of  
6 the feasibility of estimating cost-based generic prices for injectables. As there is considerable  
7 variation among items listed in the EML, a tailored approach could be to improve the precision and  
8 confidence of the estimate for specific products, for example, those identified here as having high  
9 price-to-cost ratios.  
10  
11  
12  
13

### 14 **limitations**

15  
16  
17 The main limitation of our analysis is that our estimates do not account for differences of costs  
18 across individual manufacturing plants due to heterogeneity in, for example, location, machinery  
19 used, and capacity, as well as different distribution costs (including tariffs) depending on the country  
20 of manufacture and the importing country, and changes in conversion cost depending on the volume  
21 of the unit. As argued above, this limitation would not preclude the use of a methodology such as  
22 this one to identify medicines that may have high profit margins, for closer *ad hoc* analysis.  
23  
24  
25

26 Although prices in India were adjusted to be net of VAT, other state-level taxes may apply and these  
27 were not adjusted for.  
28  
29  
30

31 In the previous analysis concerning solid oral formulations on the WHO EML, in which many  
32 elements of the methodology were identical (e.g. cost analysis for active pharmaceutical ingredient,  
33 tax and profit assumptions), the estimated cost-based generic prices were compared to the lowest  
34 available prices for key HIV, TB, and malaria treatments. Prices in these disease areas were used, as  
35 there are well-developed international procurement mechanisms for quality-assured generic  
36 products, and procurement prices are transparently reported. In this validation exercise, predictive  
37 accuracy between estimated cost-based generic price and actual global market prices was high.[28]  
38  
39 However, medicines for HIV, TB, and malaria are predominantly solid oral formulations. We have  
40 thus not attempted to conduct a similar validation exercise for the estimated cost-based prices  
41 presented in this study, for lack of a dataset to be used for comparison. As noted, however, we  
42 consider the individual assumptions made for cost components to be conservative (high).  
43  
44  
45  
46  
47  
48  
49  
50

51 As data collection for this analysis finished shortly before the publication in April 2017 of the 2017  
52 EML. The EML is published biennially; we used the most recent iteration at the time of data analysis,  
53 the 2015 EML.  
54  
55  
56  
57

### 58 **conclusion**

1  
2  
3 Most injectable medicines on the EML can be manufactured at very low cost. In England, about one  
4 in five injectable essential medicines was priced at more than 10 times the estimated cost-based  
5 price. In South Africa, this proportion was about one in ten, and in India, about one in twenty.  
6  
7 Estimation of the cost of manufacture could be used in government pharmaceutical pricing  
8 mechanisms, for example, by identifying products for which profit margins may be notably above  
9 average.  
10  
11  
12  
13  
14  
15  
16  
17  
18  
19  
20  
21  
22  
23  
24  
25  
26  
27  
28  
29  
30  
31  
32  
33  
34  
35  
36  
37  
38  
39  
40  
41  
42  
43  
44  
45  
46  
47  
48  
49  
50  
51  
52  
53  
54  
55  
56  
57  
58  
59  
60

For peer review only



## ACKNOWLEDGMENTS

None.

## FUNDING

No specific funding was received for this analysis.

## AUTHORS' CONTRIBUTIONS

DG, MJB, and AMH designed the study, interpreted the data, and critically reviewed the manuscript. MJB and DG collected and analysed the data.

## COMPETING INTERESTS

Dzintars Gotham reports personal fees for unrelated work from the Medicines Patent Pool, the Wellcome Trust, Treatment Action Group, and the World Health Organization. Melissa J Barber and Andrew M Hill report no conflicts of interest.

## DATA SHARING STATEMENT

Some unpublished data on active pharmaceutical ingredient costs could be shared upon request. An appendix with details on methodology is available as a supplementary file.

## REFERENCES

- 1 Wirtz VJ, Hogerzeil HV, Gray AL, *et al*. Essential medicines for universal health coverage. *The Lancet* 2017;**389**:403–76. doi:10.1016/S0140-6736(16)31599-9
- 2 World Health Organization. *Revised procedure for updating WHO's Model List of Essential Drugs*. 2001. <http://apps.who.int/medicinedocs/documents/s22165en/s22165en.pdf> (accessed 8 Mar 2018).
- 3 Hill A, Barber MJ, Gotham D. Estimated costs of production and potential prices for the WHO Essential Medicines List. *BMJ Glob Health* 2018;**0**:e000571. doi:10.1136/bmjgh-2017-000571
- 4 Billy Kenber. Drug firm is facing fine of £220m for hiking prices. *The Times*. 2017. <https://www.thetimes.co.uk/article/drug-firm-faces-fine-of-220m-for-hiking-prices-gf0ssclqk> (accessed 28 Oct 2018).
- 5 Competition and Markets Authority. CMA fines Pfizer and Flynn £90 million for drug price hike to NHS. <https://www.gov.uk/government/news/cma-fines-pfizer-and-flynn-90-million-for-drug-price-hike-to-nhs> (accessed 28 Oct 2018).
- 6 Gotham D, Barber MJ, Hill A. Production costs and potential prices for biosimilars of human insulin and insulin analogues. *BMJ Glob Health* 2018;**3**:e000850. doi:10.1136/bmjgh-2018-000850
- 7 World Health Organization. *19th WHO Model List of Essential Medicines*. 2015. [http://www.who.int/medicines/publications/essentialmedicines/EML2015\\_8-May-15.pdf?ua=1](http://www.who.int/medicines/publications/essentialmedicines/EML2015_8-May-15.pdf?ua=1) (accessed 28 Jan 2016).
- 8 Hill A, Gotham D, Cooke et al. G. Analysis of minimum target prices for production of entecavir to treat hepatitis B in high- and low-income countries. *J Virus Erad* 2015;**1**:103–10.
- 9 Hill A, Gotham D, Fortunak J, *et al*. Target prices for mass production of tyrosine kinase inhibitors for global cancer treatment. *BMJ Open* 2016;**6**:e009586. doi:10.1136/bmjopen-2015-009586
- 10 Hill A, Simmons B, Gotham D, *et al*. Rapid reductions in prices for generic sofosbuvir and daclatasvir to treat hepatitis C. *J Virus Erad* 2016;**2**:28–31.
- 11 Hill A, Redd C, Gotham D, *et al*. Estimated generic prices of cancer medicines deemed cost-ineffective in England: a cost estimation analysis. *BMJ Open* 2017;**7**:e011965. doi:10.1136/bmjopen-2016-011965
- 12 Gotham D, Fortunak J, Pozniak A, *et al*. Estimated generic prices for novel treatments for drug-resistant tuberculosis. *J Antimicrob Chemother* 2017;**;**:dkw522. doi:10.1093/jac/dkw522
- 13 Sedita J, Perrella S, Morio M, *et al*. Cost of goods sold and total cost of delivery for oral and parenteral vaccine packaging formats. *Vaccine* 2018;**36**:1700–9. doi:10.1016/j.vaccine.2018.01.011
- 14 Karamelic J, Ridic O, Ridic G, *et al*. Financial aspects and the future of the pharmaceutical industry in the United States of america. *Mater Socio-Medica* 2013;**25**:286–90. doi:10.5455/msm.2013.25.286-290

- 1
- 2
- 3
- 4 15 IMS Institute for Healthcare Informatics. Understanding the pharmaceutical value chain. 2014.  
5 [https://www.ifpma.org/wp-content/uploads/2016/02/IIHI\\_Report\\_Pharma\\_Value.pdf](https://www.ifpma.org/wp-content/uploads/2016/02/IIHI_Report_Pharma_Value.pdf)
- 6
- 7 16 Medicines Patent Pool. *MedsPaL*. <http://www.medspal.org/> (accessed 28 Feb 2018).
- 8
- 9 17 Murphy, Heather. "Teva and other generic drugmakers inflated prices up to 1000%,  
10 State Prosecutors say." *The New York Times*. 11 May 2019. Available from:  
11 <https://www.nytimes.com/2019/05/11/health/teva-price-fixing-lawsuit.html>
- 12
- 13 18 MSF Access campaign. *DR-TB drugs under the microscope: Sources and prices for drug-resistant*  
14 *tuberculosis medicines*. 2016. [http://www.msfaccess.org/sites/default/files/TB\\_report\\_\\_DR-](http://www.msfaccess.org/sites/default/files/TB_report__DR-TB_DRUGS_UTM__4th_edition_2016.pdf)  
15 [TB\\_DRUGS\\_UTM\\_\\_4th\\_edition\\_2016.pdf](http://www.msfaccess.org/sites/default/files/TB_report__DR-TB_DRUGS_UTM__4th_edition_2016.pdf) (accessed 22 Mar 2016).
- 16
- 17 19 NHS Digital. Prescribing Costs in Hospitals and the Community, England 2016/17: NICE Data.  
18 <https://files.digital.nhs.uk/publication/n/0/hosp-pres-eng-201617-nicedata.csv> (accessed 28 Oct  
19 2018).
- 20
- 21 20 Garg CC, Karan AK. Reducing out-of-pocket expenditures to reduce poverty: A disaggregated  
22 analysis at rural-urban and state level in India. *Health Policy Plan* 2009;**24**:116–128.  
23 doi:10.1093/heapol/czn046
- 24
- 25 21 Kotwani A, Levison L. Price components and access to medicines in Delhi, India.  
26 2007. <http://apps.who.int/medicinedocs/documents/s19208en/s19208en.pdf>
- 27
- 28 22 World Health Organization. WHO guidelines on country pharmaceutical pricing policies. 2015.  
29 <http://apps.who.int/medicinedocs/documents/s21016en/s21016en.pdf>
- 30
- 31 23 Republic of South Africa National Department of Health. *Special Requirements and Conditions of*  
32 *Contract. HP09–2016SD/01. The supply and delivery of solid dosage forms to the Department of*  
33 *Health for the period up to 31 July 2018*. 2017.  
34 <http://www.health.gov.za/tender/docs/contracts/HP092016SD01ContractCircular.pdf> (accessed  
35 11 Jul 2017).
- 36
- 37 24 Central Board of Excise and Customs. Notification No. 140/2016.  
38 [https://www.seair.co.in/custom-notifications/notifications-issued-in-the-year-2016-notification-](https://www.seair.co.in/custom-notifications/notifications-issued-in-the-year-2016-notification-no-1402016-dated-25th-nov-2016-268128.aspx)  
39 [no-1402016-dated-25th-nov-2016-268128.aspx](https://www.seair.co.in/custom-notifications/notifications-issued-in-the-year-2016-notification-no-1402016-dated-25th-nov-2016-268128.aspx) (accessed 4 Apr 2017).
- 40
- 41 25 World Health Organization. Medicines shortages: Global approaches to addressing shortages of  
42 essential medicines in health systems. *WHO Drug Inf* 2016;**30**.
- 43
- 44 26 Gray A, Manasse H. Shortages of medicines: a complex global challenge. *Bull World Health*  
45 *Organ* 2012;**90**:158–158. doi:10.2471/BLT.11.101303
- 46
- 47 27 Iyengar S, Hedman L, Forte G, *et al*. Medicine shortages: a commentary on causes and mitigation  
48 strategies. *BMC Med* 2016;**14**. doi:10.1186/s12916-016-0674-7
- 49
- 50 28 Hill A, Barber M, Gotham D, Fortunak J, Pozniak A. Generic treatments for HIV, HBV, HCV, TB  
51 could be mass produced for <\$90 per patient. In: 9th IAS Conference on HIV Science. Paris, 2017.  
52 <http://programme.ias2017.org/Abstract/Abstract/1978>.
- 53
- 54
- 55
- 56
- 57
- 58
- 59
- 60

1  
2  
3 **TABLES AND FIGURES**  
4  
5  
6  
7  
8  
9  
10  
11  
12  
13  
14  
15  
16  
17  
18  
19  
20  
21  
22  
23  
24  
25  
26  
27  
28  
29  
30  
31  
32  
33  
34  
35  
36  
37  
38  
39  
40  
41  
42  
43  
44  
45  
46  
47  
48  
49  
50  
51  
52  
53  
54  
55  
56  
57  
58  
59  
60

For peer review only

**Table 1. Comparison of estimated prices and lowest current prices in England, South Africa, and India.**

|                                                  | <b>England</b> | <b>South Africa</b> | <b>India</b> |
|--------------------------------------------------|----------------|---------------------|--------------|
| <b>Injectables</b>                               |                |                     |              |
| >10x estimated price                             | 15 (19%)       | 5 (9%)              | 4 (5%)       |
| 0-10x estimated price                            | 47 (58%)       | 31 (53%)            | 8 (10%)      |
| Below estimated price                            | 19 (23%)       | 22 (38%)            | 68 (85%)     |
| Median ratio of current price to estimated price | 2.54x          | 1.48x               | 0.30x        |

Note: multiple dosage levels of one formulation of one medicine (e.g. ifosfamide powder for injection in 1g and 2g forms) are counted as one instance in these overview statistics.

**Table 2. Injectable essential medicines with the highest price compared to estimated cost-based price, in England.**

| Medicine      | Unit                          | Lowest current price (USD) | Estimated cost-based price (USD) | Ratio |
|---------------|-------------------------------|----------------------------|----------------------------------|-------|
| irinotecan    | 5mL vial (100mg)              | \$143.81                   | \$1.17                           | 122.7 |
| filgrastim    | 1mL vial (300mcg)             | \$68.52                    | \$0.61                           | 112.6 |
| ibuprofen     | 1mL injection (5mg)           | \$46.80                    | \$0.61                           | 77.3  |
| daunorubicin  | powder for injection (50mg)   | \$211.25                   | \$2.88                           | 73.4  |
| azathioprine  | powder for injection (100mg)  | \$39.99                    | \$0.66                           | 60.5  |
| ifosfamide    | powder for injection (2g)     | \$233.84                   | \$4.10                           | 57.1  |
| ifosfamide    | powder for injection (1g)     | \$118.72                   | \$2.35                           | 50.5  |
| ifosfamide    | powder for injection (500mg)  | \$59.35                    | \$1.48                           | 40.2  |
| mesna         | 10mL ampoule (1000mg)         | \$38.23                    | \$1.13                           | 33.9  |
| atropine      | 1mL ampoule (1mg)             | \$8.25                     | \$0.24                           | 33.7  |
| ampicillin    | powder for injection (1000mg) | \$20.36                    | \$0.64                           | 31.6  |
| mesna         | 4mL ampoule (400mg)           | \$17.43                    | \$0.60                           | 29.2  |
| phenobarbital | 1mL injection (200mg)         | \$7.32                     | \$0.26                           | 27.7  |
| epinephrine   | 10mL ampoule (1mg)            | \$6.97                     | \$0.27                           | 26.1  |
| valproic acid | 4mL ampoule (400mg)           | \$5.09                     | \$0.26                           | 19.9  |
| zidovudine    | 20mL vial (200mg)             | \$11.60                    | \$0.67                           | 17.3  |
| ampicillin    | powder for injection (500mg)  | \$10.18                    | \$0.62                           | 16.3  |
| irinotecan    | 25mL vial (500mg)             | \$46.83                    | \$3.44                           | 13.6  |
| ketamine      | 10mL vial (500mg)             | \$9.10                     | \$0.79                           | 11.4  |
| hydralazine   | powder for injection (20mg)   | \$2.88                     | \$0.25                           | 11.4  |

**Table 3. Injectable essential medicines with the highest price compared to estimated cost-based price, in South Africa.**

| Medicine          | Unit                          | Lowest current price (USD) | Estimated cost-based price (USD) | Ratio |
|-------------------|-------------------------------|----------------------------|----------------------------------|-------|
| filgrastim        | 1mL vial (300mcg)             | \$32.38                    | \$0.61                           | 46.3  |
| tranexamic acid   | 10mL ampoule (1000mg)         | \$8.47                     | \$0.37                           | 23.0  |
| ifosfamide        | powder for injection (1g)     | \$28.71                    | \$2.35                           | 12.2  |
| ifosfamide        | powder for injection (2g)     | \$48.71                    | \$4.10                           | 11.9  |
| ifosfamide        | powder for injection (500mg)  | \$17.22                    | \$1.48                           | 11.7  |
| streptokinase     | powder for injection (15.6mg) | \$223.93                   | \$19.60                          | 11.4  |
| amiodarone        | ampoule (150mg/3mL)           | \$2.87                     | \$0.27                           | 10.7  |
| digoxin           | 2mL ampoule (500mcg)          | \$2.44                     | \$0.25                           | 9.9   |
| fluphenazine      | 1mL ampoule (25mg)            | \$2.30                     | \$0.32                           | 7.1   |
| oxaliplatin       | powder for injection (100mg)  | \$59.76                    | \$9.10                           | 6.6   |
| oxaliplatin       | powder for injection (50mg)   | \$29.88                    | \$4.85                           | 6.2   |
| magnesium sulfate | 10mL ampoule (5g)             | \$1.36                     | \$0.26                           | 5.2   |
| ciclosporin       | 1mL ampoule (50mg)            | \$1.72                     | \$0.33                           | 5.2   |
| docetaxel         | injection (20mg)              | \$21.70                    | \$4.21                           | 5.1   |

|              |                              |         |        |     |
|--------------|------------------------------|---------|--------|-----|
| docetaxel    | injection (40mg)             | \$34.29 | \$7.82 | 4.4 |
| mesna        | 4mL ampoule (400mg)          | \$2.40  | \$0.60 | 4.0 |
| daunorubicin | powder for injeciton (50mg)  | \$10.03 | \$2.88 | 3.5 |
| vincristine  | powder for injection (5mg)   | \$13.92 | \$4.15 | 3.4 |
| aciclovir    | powder for injection (250mg) | \$2.10  | \$0.63 | 3.3 |
| quinine      | 2mL ampoule (600mg)          | \$1.10  | \$0.34 | 3.2 |

For peer review only

**Table 4. Injectable essential medicines with the highest price compared to estimated cost-based price , in India.**

| Medicine                         | Unit                        | Lowest current price (USD) | Estimated cost-based price (USD) | Ratio |
|----------------------------------|-----------------------------|----------------------------|----------------------------------|-------|
| irinotecan                       | 25mL vial (500mg)           | \$107.14                   | \$3.44                           | 31.1  |
| filgrastim                       | 1mL vial (300mcg)           | \$15.71                    | \$0.61                           | 25.8  |
| irinotecan                       | 5mL vial (100mg)            | \$21.43                    | \$1.17                           | 18.3  |
| irinotecan                       | 2mL vial (40mg)             | \$10.71                    | \$0.83                           | 12.9  |
| bendamustine                     | 2mL injection (180mg)       | \$185.14                   | \$15.05                          | 12.3  |
| bendamustine                     | 0.5mL injection (45mg)      | \$46.29                    | \$4.22                           | 11.0  |
| valproic acid (sodium valproate) | 10mL ampoule (1g)           | \$2.86                     | \$0.28                           | 10.3  |
| ciclosporin                      | 1mL ampoule (50mg)          | \$1.71                     | \$0.33                           | 5.2   |
| testosterone                     | 1mL ampoule (200mg)         | \$1.34                     | \$0.27                           | 4.9   |
| valproic acid (sodium valproate) | 4mL ampoule (400mg)         | \$1.14                     | \$0.26                           | 4.5   |
| insulin injection (soluble)      | 10mL injection (34.7mg)     | \$5.80                     | \$2.15                           | 2.7   |
| sodium nitroprusside             | powder for injection (50mg) | \$0.64                     | \$0.25                           | 2.5   |

*All other items for which ratios could be calculated had ratios below 2.0.*

**Figure 1. Formula for estimating cost-based prices for injectable formulations.**

**Figure 2. Estimated generic prices and current prices for injectables in England, South Africa, and India.**

**Figure 3. Comparison of lowest current prices of injectable essential medicines between England, South Africa, and India.**



1  
2  
3  
4  
5  
6  
7  
8  
9  
10  
11  
12  
13  
14  
15  
16  
17  
18  
19  
20  
21  
22  
23  
24  
25  
26  
27  
28  
29  
30  
31  
32  
33  
34  
35  
36  
37  
38  
39  
40  
41  
42  
43  
44  
45  
46  
47  
48  
49  
50  
51  
52  
53  
54  
55  
56  
57  
58  
59  
60

Cost of API per kilogram

Multiply by mass of API needed for one dosage unit

If applicable, multiply by [MW/dosage in one unit] to adjust for salt forms

Multiply by 1.1 to account for 10% loss of API during formulation and overfill

Total cost of production per unit

Add \$0.20 for ampoule/\$0.50 for vial for cost of materials and formulation

Add costs associated with transportation 10%

Add profit margin of 10%

Estimated cost-based price

**UK**

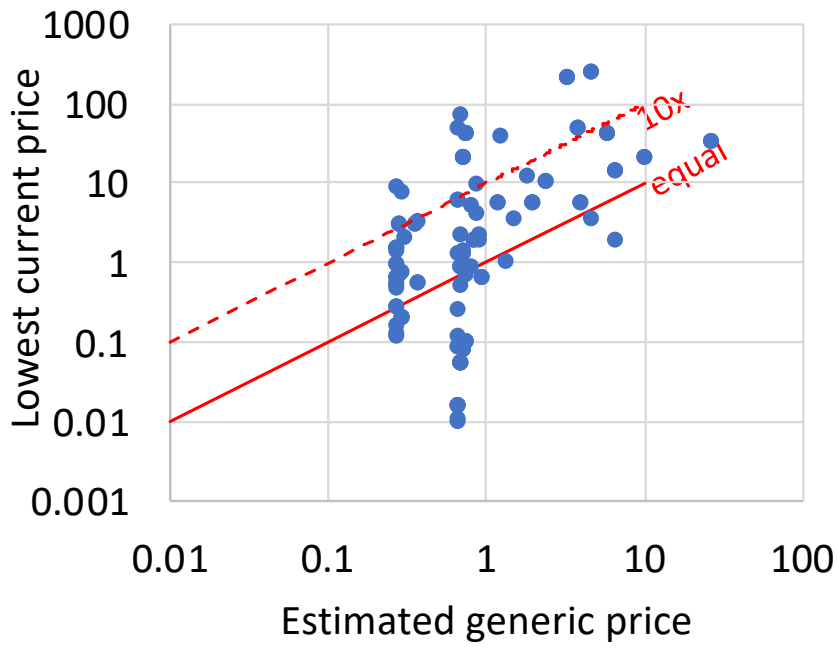

**South Africa**

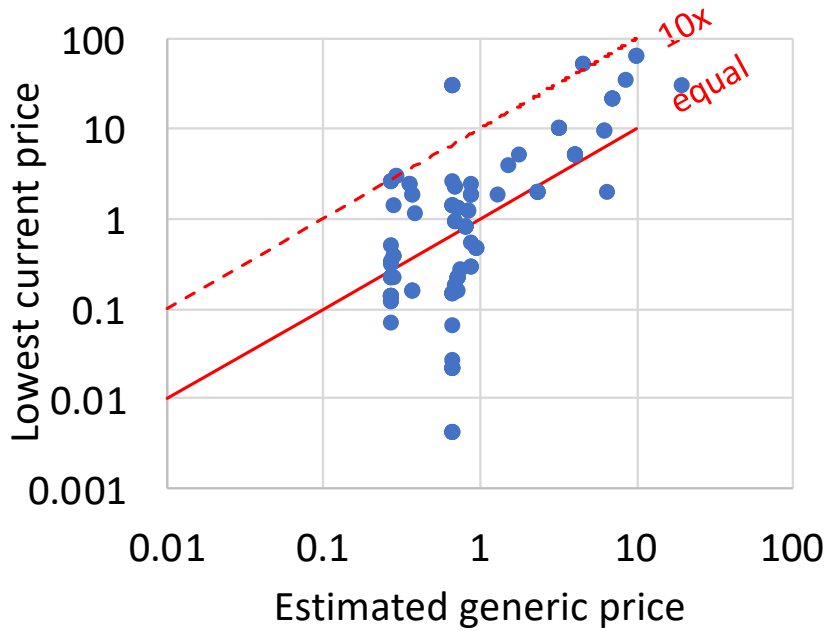

**India**

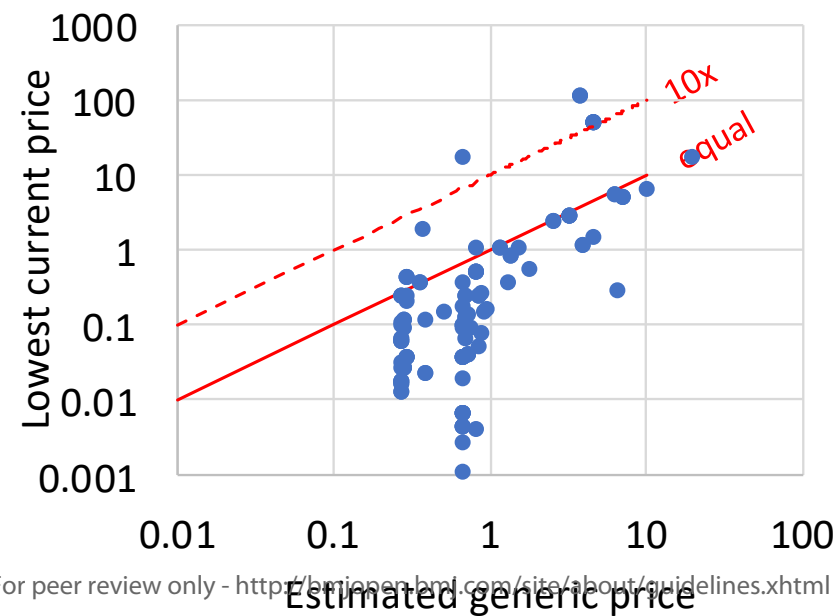

1  
2  
3  
4  
5  
6  
7  
8  
9  
10  
11  
12  
13  
14  
15  
16  
17  
18  
19  
20  
21  
22  
23  
24  
25  
26  
27  
28  
29  
30  
31  
32  
33  
34  
35  
36  
37  
38  
39  
40  
41  
42  
43  
44  
45  
46  
47  
48  
49  
50  
51  
52  
53  
54  
55  
56  
57  
58  
59  
60

### UK versus South Africa

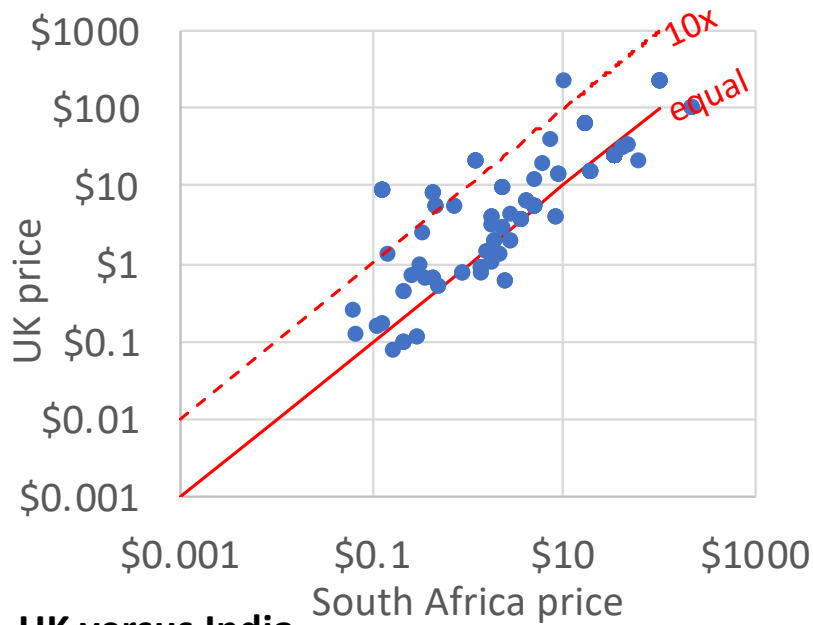

### UK versus India

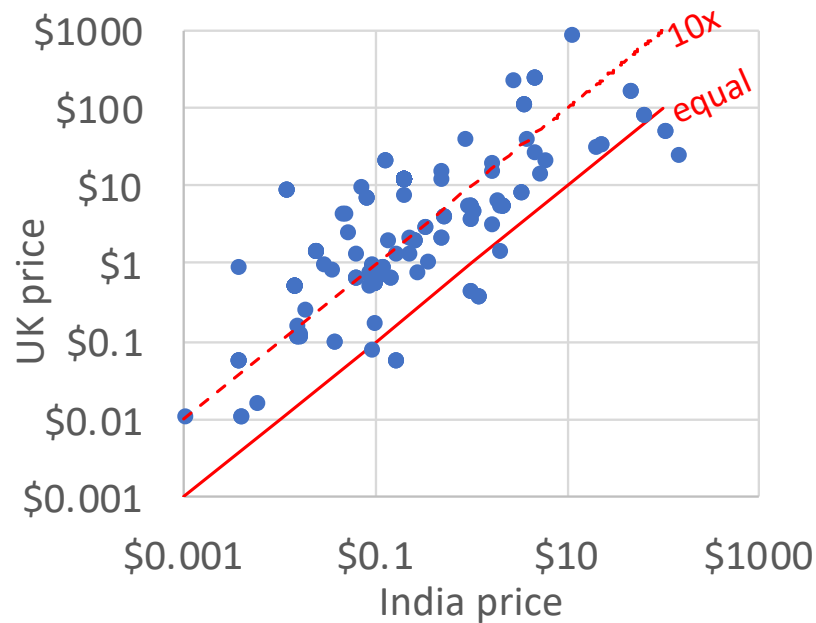

### South Africa versus India

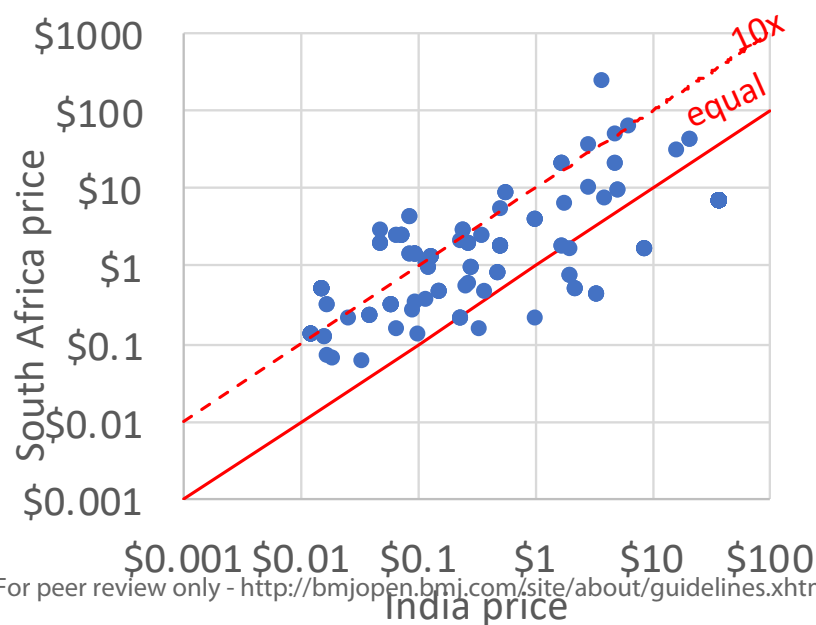

**Appendix**

For peer review only

1  
2  
3  
4  
5  
6  
7  
8  
9  
10  
11  
12  
13  
14  
15  
16  
17  
18  
19  
20  
21  
22  
23  
24  
25  
26  
27  
28  
29  
30  
31  
32  
33  
34  
35  
36  
37  
38  
39  
40  
41  
42  
43  
44  
45  
46  
47  
48  
49  
50  
51  
52  
53  
54  
55  
56  
57  
58  
59  
60

#### Criteria used for cleaning export data.

| Reason for censoring                                                            | Example of product description that would trigger censoring                                                                                                                                                 |
|---------------------------------------------------------------------------------|-------------------------------------------------------------------------------------------------------------------------------------------------------------------------------------------------------------|
| Incorrect substance identified                                                  | "DIAMORPHINE" (in a search for "morphine")                                                                                                                                                                  |
| Item is part of a mix of products                                               | "ABACAVIR, LOPINAVIR, LAMIVUDINE API"                                                                                                                                                                       |
| Quantity of shipment < 1.0 kg, with exceptions made for very low-dose medicines | Value listed in "quantity" variable greater than 1.0kg                                                                                                                                                      |
| Finished Pharmaceutical Product (FPP), for example tablets                      | "ABACAVIR SULFATE TABLETS 600MG"                                                                                                                                                                            |
| Impurity                                                                        | "ABACAVIR SULPHATE IMPURITY"                                                                                                                                                                                |
| Unclear quantity of API                                                         | "ABACAVIR GRANULES 10%"<br>(In this example, the percentage descriptor could refer to a variety of parameters, for example, moisture content. As this is not specified, the true amount of API is unknown.) |
| Free sample or 'no commercial value'                                            | "ABACAVIR SULPHATE FREE SAMPLE"<br>"ABACAVIR SULPHATE N.C.V."                                                                                                                                               |
| For veterinary use                                                              | "IVERMECTIN VETERINARY"                                                                                                                                                                                     |
| Reference/working standard                                                      | "ABACAVIR WORKING STANDARD"                                                                                                                                                                                 |

This table is reproduced from an earlier publication as this element of the methodology was identical:

Hill A, Barber MJ, Gotham D. Estimated costs of production and potential prices for the WHO Essential Medicines List. *BMJ Global Health* 2018; e000571.

**Included and excluded formulation types, by terms used in WHO Model List of Essential Medicines.**

|                                                                                                                                                                                                                                                                                                                                                                                                                                                                                                                                                                                                                                                                                                                                                                                                                                                                                                                                                                                                                                                                                                                                                                                                                                           |
|-------------------------------------------------------------------------------------------------------------------------------------------------------------------------------------------------------------------------------------------------------------------------------------------------------------------------------------------------------------------------------------------------------------------------------------------------------------------------------------------------------------------------------------------------------------------------------------------------------------------------------------------------------------------------------------------------------------------------------------------------------------------------------------------------------------------------------------------------------------------------------------------------------------------------------------------------------------------------------------------------------------------------------------------------------------------------------------------------------------------------------------------------------------------------------------------------------------------------------------------|
| <b>Included:</b>                                                                                                                                                                                                                                                                                                                                                                                                                                                                                                                                                                                                                                                                                                                                                                                                                                                                                                                                                                                                                                                                                                                                                                                                                          |
| Concentrate for injection, depot injection, infusion, injectable solution, injection, injection for intravenous administration, injection for spinal anaesthesia, injection in oil, injection: ampoule or pre-filled syringe, injections, oily injection, oily solution, oily suspension for injection, parenteral formulation, powder for injection, solution for injection, solution for intramuscular injection, solution for IV infusion, vial.                                                                                                                                                                                                                                                                                                                                                                                                                                                                                                                                                                                                                                                                                                                                                                                       |
| <b>Excluded:</b>                                                                                                                                                                                                                                                                                                                                                                                                                                                                                                                                                                                                                                                                                                                                                                                                                                                                                                                                                                                                                                                                                                                                                                                                                          |
| Ampoule (for buccal administration when solution for oromucosal administration is not available), aqueous solution*, bag for infusion, capsule, cream, cream (as mupirocin calcium), cream or lotion, cream or ointment, dental cartridge, detergent-based suspension, eye ointment, gel or rectal solution, granules, granules (slow-release; to mix with water), immediate release capsule, inhalation (aerosol), lotion, lozenge, metered dose inhaler (aerosol), nasal spray, ointment, oral liquid, oral powder, pessary, powder for oral administration, powder for oral liquid, pre-filled syringe, rectal dosage form, rectal solution, respirator solution for use in nebulizers, retention enema, saturated solution, solid oral dosage form, solid oral dosage form (controlled-release tablets), solid oral form, solution, solution (eye drops), solution for oromucosal administration, suppository, tablet, tablet (chewable), tablet (crushable), tablet (dispersible, scored), tablet (dispersible), tablet (enteric-coated), tablet (heat stable), tablet (immediate release), tablet (scored), tablet (slow release), tablet (sublingual), topical, topical forms, transdermal patches, vaginal cream, vaginal tablet. |

\*this represents potassium permanganate for topical use in dermatology.

Figure A1. Example of API data: Price of linezolid API exported from India from July 1, 2014 to July 1, 2016.

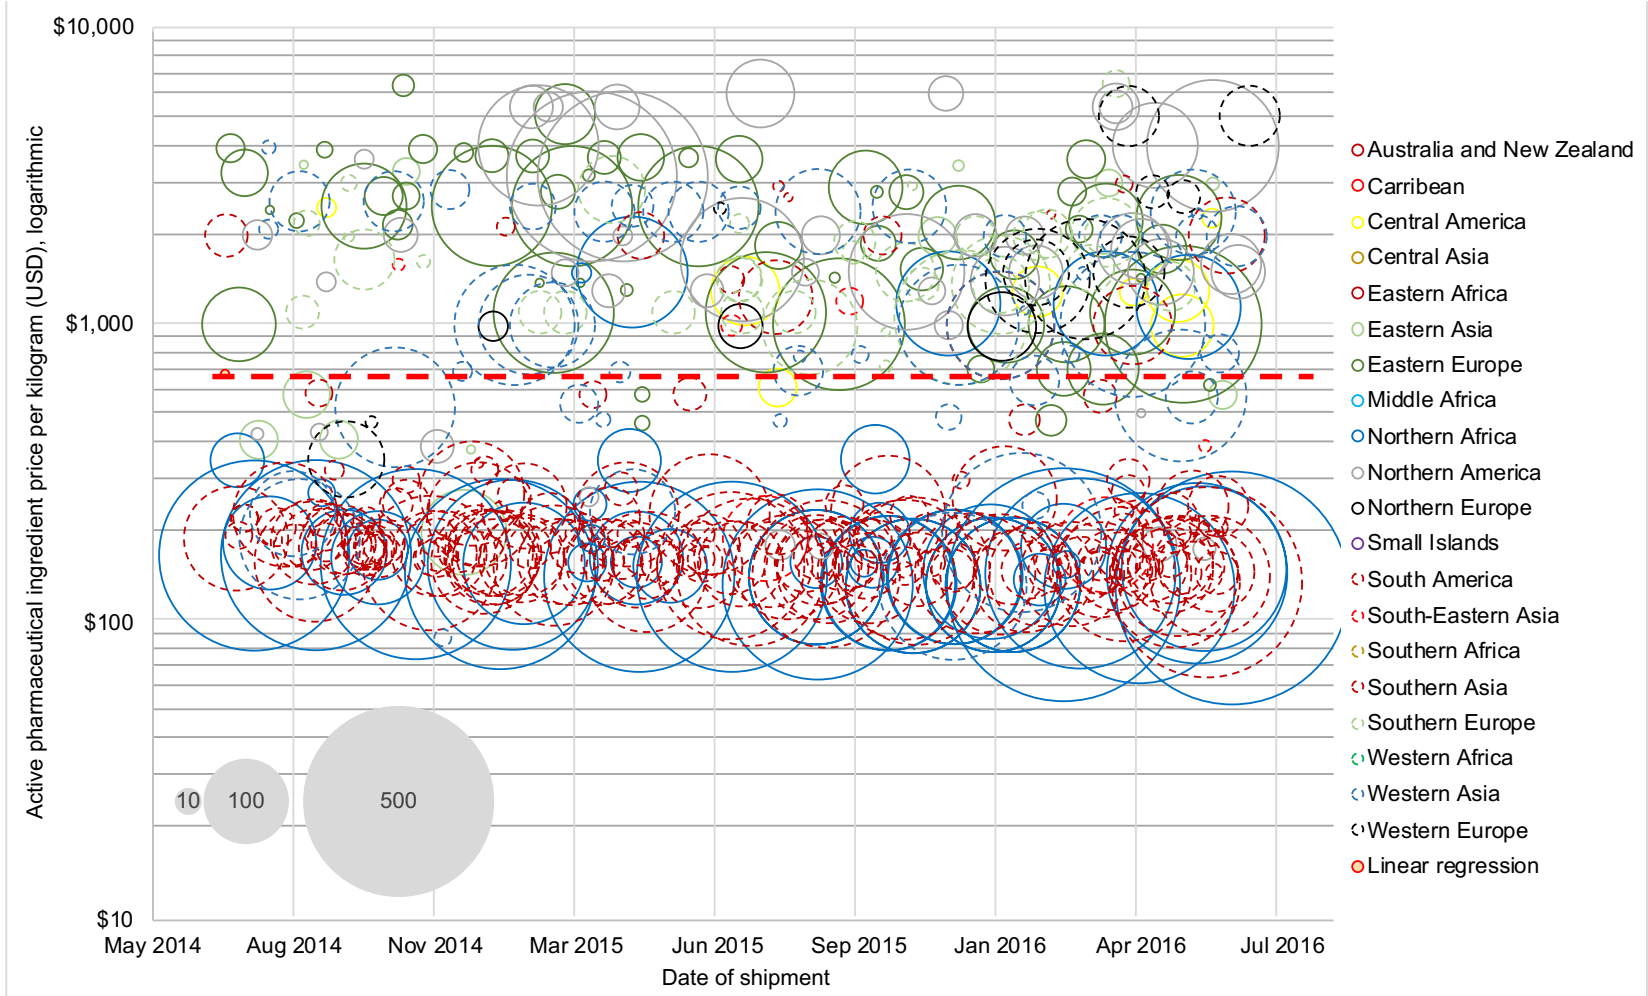

Bubble colours correspond to the region of the destination country for individual shipments. Bubble sizes correspond to the size of individual shipments (size key shown in lower-left, in kilograms). The linear regression model is shown as a dashed red line; though it appears horizontal it has a slight upwards slope. The values estimated by the linear regression model were \$683/kg on July 1, 2014, and \$690/kg on July 1, 2016.

## Costs prescribed in India's Drug Price Control Order (2012).

| Item                                           | Cost per unit in 2011<br>Indian rupees | Converted to 2016 USD |
|------------------------------------------------|----------------------------------------|-----------------------|
| <b>Conversion cost</b>                         |                                        |                       |
| <i>Ampoules</i>                                |                                        |                       |
| Up to 1mL                                      | 0.4253                                 | \$0.008               |
| 100mL                                          | 1.4327                                 | \$0.028               |
| <i>Sterile vials</i>                           |                                        |                       |
| Up to 5mL                                      | 1.22                                   | \$0.024               |
| 100mL                                          | 3.21                                   | \$0.063               |
| <b>Packing materials cost</b>                  |                                        |                       |
| <i>USP type I glass vial including blister</i> |                                        |                       |
| Up to 2mL                                      | 1.48                                   | \$0.029               |
| 100mL                                          | 6.96                                   | \$0.136               |
| <i>Plastic vial/bottle</i>                     |                                        |                       |
| Up to 2mL                                      | 0.99                                   | \$0.019               |
| 100mL                                          | 2.96                                   | \$0.058               |
| <i>Ampoules</i>                                |                                        |                       |
| <i>White ampoule in tray</i>                   |                                        |                       |
| Up to 1mL                                      | 0.53                                   | \$0.010               |
| 25mL                                           | 2.86                                   | \$0.056               |
| <i>Amber ampoules in blister</i>               |                                        |                       |
| Up to 1mL                                      | 0.63                                   | \$0.012               |
| 25mL                                           | 4.68                                   | \$0.091               |
| <b>Packing charges</b>                         |                                        |                       |
| <i>Ampoules</i>                                |                                        |                       |
| Up to 5mL                                      | 0.33                                   | \$0.006               |
| Over 15mL                                      | 0.56                                   | \$0.011               |
| <i>Liquid in vials</i>                         |                                        |                       |
| Up to 5mL                                      | 0.6                                    | \$0.012               |
| Over 5mL                                       | 0.69                                   | \$0.013               |
| <i>Sterile powder in vials</i>                 |                                        |                       |
| Up to 1g                                       | 0.23                                   | \$0.004               |
| Over 1g                                        | 0.38                                   | \$0.007               |
| <b>Ampoules range</b>                          |                                        | <b>\$0.03–\$0.13</b>  |
| <b>Vials range</b>                             |                                        | <b>\$0.05–\$0.21</b>  |

Pharmabiz.com. NPPA notification dated Dec 27, 2012 fixing/revising the norms for conversion cost (CC), packing charges (PC), process loss (PL) and packing material. Available from: <http://pharmabiz.com/PrintArticle.aspx?aid=72988> (accessed 6 November 2018).

Rupee values were inflation-adjusted by a factor of 1.30, based on inflation data provided by the World Bank, available from <https://data.worldbank.org/indicator/FP.CPI.TOTL.ZG?locations=IN>.



**Figure A2. Injectable target prices versus injectable API cost alone (all USD).**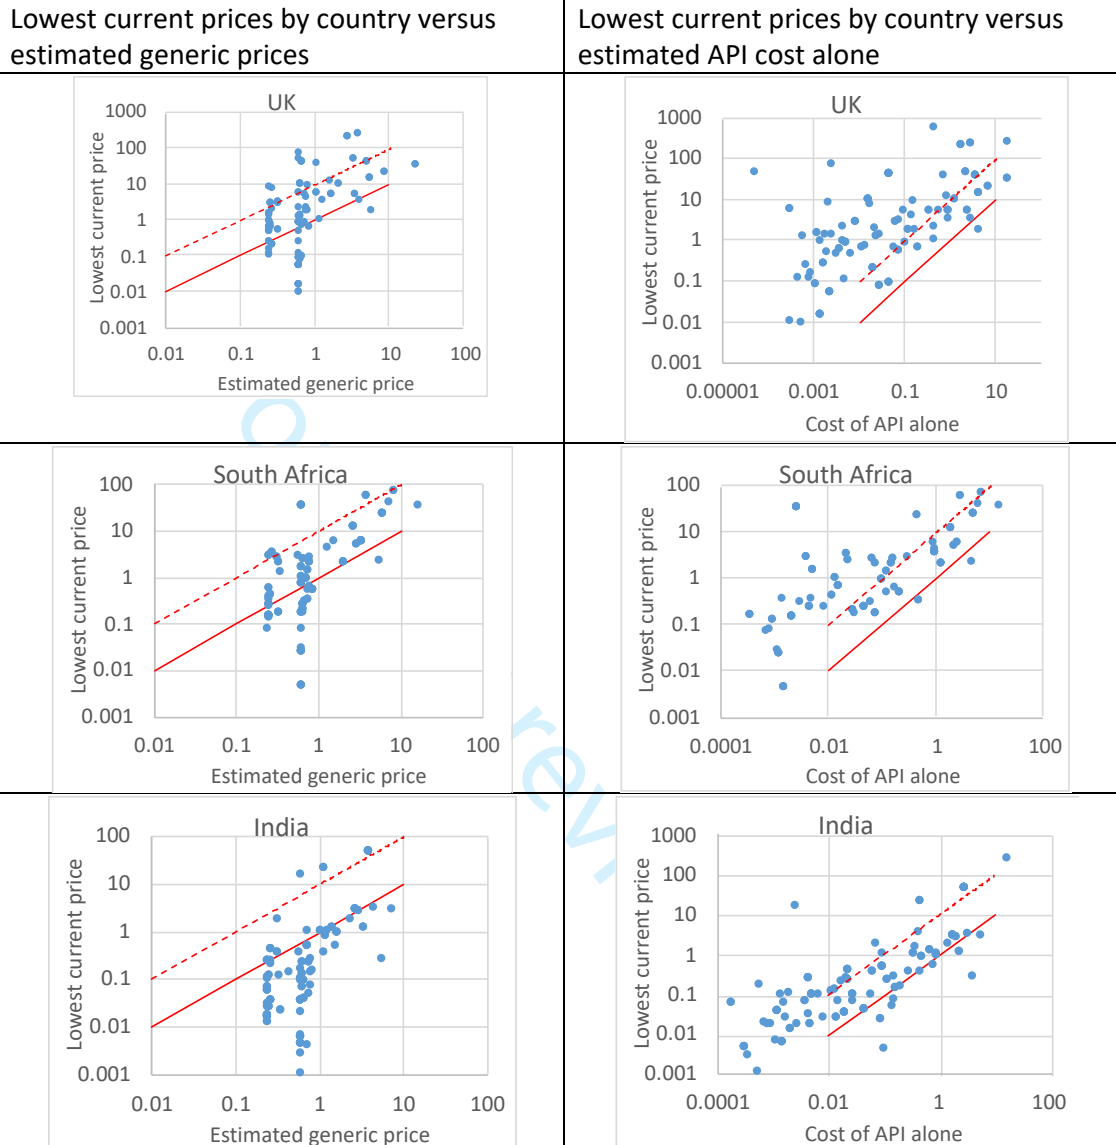

*Solid red line: Points above this line represent an instance where the lowest current price is greater than the estimated generic price/API cost.*

*Dashed red line: Points above this line represent an instance where the lowest current price is more than 10 times the estimated generic price/API cost.*

'Floors' can be seen for estimated generic price at \$0.24 and \$0.61 – the cost-based prices estimated by our algorithm for ampoules and vials, respectively, if API costs are zero, therefore, the estimated cost-based price cannot be below these 'floors'. In all countries, it can be observed that in some cases (in India more than in South Africa more than in UK) lowest current prices go below these 'floors'.

Ratio of estimated cost-based prices to lowest current prices in the UK, South Africa, and India, by therapeutic category.

| Medicine                                                             | UK   | South Africa | India |
|----------------------------------------------------------------------|------|--------------|-------|
| Specific medicines for neonatal care                                 | 43.4 | 0.8          | 0.1   |
| Cardiovascular medicines                                             | 5.2  | 9.9          | 0.2   |
| Medicines for mental and behavioural disorder                        | 5.7  | 7.1          | 0.1   |
| Hormones, other endocrine medicines and contraceptives               | 4.5  | 0.8          | 2.8   |
| Anticonvulsants/antiepileptics                                       | 2.8  | 3.7          | 0.3   |
| Antineoplastics and immunosuppressives                               | 3.0  | 2.7          | 0.7   |
| Oxytocics and antioxytocics                                          | 3.7  | 1.3          | 0.4   |
| Antidotes and other substances used in poisonings                    | 2.5  | 1.4          | 0.4   |
| Anti-infectives                                                      | 2.0  | 1.4          | 0.3   |
| Gastrointestinal medicines                                           | 1.3  | 1.0          | 0.1   |
| Muscle relaxants (peripherally-acting) and cholinesterase inhibitors | 1.6  | 0.5          | 0.1   |
| Antiallergics and medicines used in anaphylaxis                      | 0.7  | 0.9          | 0.1   |
| Medicines acting on the respiratory tract                            | 0.7  | NA           | 0.1   |
| Medicines affecting the blood                                        | 0.6  | 0.5          | 0.1   |
| Medicines for pain and palliative care                               | 0.6  | 0.5          | 0.1   |
| Anaesthetics                                                         | 0.2  | 0.2          | 0.1   |
| Diuretics                                                            | 0.3  | 0.1          | 0.0   |
| Antimigraine medicines                                               | NA   | NA           | NA    |
| Antiparkinsonism Medicines                                           | NA   | NA           | NA    |
| Dermatological Medicines (topical)                                   | NA   | NA           | NA    |
| Ophthalmological Preparations                                        | NA   | NA           | NA    |
| Ear, nose and throat medicines (children)                            | NA   | NA           | NA    |
| Medicines for diseases of joints                                     | NA   | NA           | NA    |

Table is ranked by highest to lowest mean ratio across the three countries.

**Full results table: Lowest current prices in the UK, South Africa, and India, and estimated cost-based generic prices.**

| Medicine                    | Unit                                                      | UK price (USD) | UK price source | South Africa price (USD) | India price (USD) | India price source | Cost of API per unit | Estimated cost-based product price per unit |
|-----------------------------|-----------------------------------------------------------|----------------|-----------------|--------------------------|-------------------|--------------------|----------------------|---------------------------------------------|
| acetylcysteine              | 2000mg ampoule                                            | \$1.36         | eMIT            | \$1.57                   | \$2.00            | TN                 |                      |                                             |
| aciclovir                   | powder for injection (250mg)                              | \$1.24         | eMIT            | \$2.10                   | \$0.23            | TN                 | \$0.02215            | \$0.63448                                   |
| amikacin                    | powder for injection (1000mg)                             | \$23.83        | eMIT            | \$0.55                   | \$0.27            | TN                 |                      |                                             |
| amikacin                    | powder for injection (100mg)                              | \$2.38         | eMIT            | \$0.33                   | \$0.05            | TN                 |                      |                                             |
| amikacin                    | powder for injection (500mg)                              | \$11.92        | eMIT            | \$0.28                   | \$0.14            | TN                 |                      |                                             |
| amiodarone                  | ampoule (150mg/3mL)                                       | \$1.95         | BNF             | \$2.87                   | \$0.24            | TN                 | \$0.02024            | \$0.26893                                   |
| amphotericin B              | powder for injection (50mg)                               | \$5.04         | BNF             |                          | \$1.02            | TN                 | \$0.09296            | \$0.72872                                   |
| ampicillin                  | powder for injection (1000mg)                             | \$20.36        | BNF             | \$1.21                   | \$0.13            | TN                 | \$0.02941            | \$0.64415                                   |
| ampicillin                  | powder for injection (500mg)                              | \$10.18        | BNF             | \$0.61                   | \$0.06            | TN                 | \$0.01471            | \$0.62457                                   |
| artemether                  | ampoule (80mg/1mL)                                        |                |                 |                          | \$0.40            | P                  | \$0.02194            | \$0.27120                                   |
| artesunate                  | artesunate ampoule (60mg) & 5% sodium bicarbonate ampoule |                |                 |                          |                   |                    |                      |                                             |
| asparaginase                | powder for injection (10,000iU)                           | \$796.90       | BNF             |                          | \$11.57           | TN                 |                      |                                             |
| atracurium                  | 1mL injection (10mg)                                      | \$0.86         | BNF             |                          | \$0.00            | TN                 | \$0.09646            | \$0.73339                                   |
| atropine                    | 1mL ampoule (1mg)                                         | \$8.25         | BNF             | \$0.13                   | \$0.01            | TN                 | \$0.00198            | \$0.24464                                   |
| azathioprine                | powder for injection (100mg)                              | \$39.99        | BNF             |                          |                   |                    | \$0.04225            | \$0.66124                                   |
| bendamustine                | 2mL injection (180mg)                                     |                |                 |                          | \$185.14          | P                  | \$10.85220           | \$15.04928                                  |
| bendamustine                | 0.5mL injection (45mg)                                    |                |                 |                          | \$46.29           | P                  | \$2.71305            | \$4.21607                                   |
| benzathine benzylpenicillin | 5mL vial (1.44g)                                          |                |                 |                          | \$0.23            | P                  |                      |                                             |
| benzathine benzylpenicillin | 5mL vial (900mg)                                          |                |                 |                          | \$0.17            | P                  |                      |                                             |
| benzylpenicillin            | powder for injection (3g)                                 | \$15.18        | BNF             |                          | \$0.49            | TN                 |                      |                                             |
| benzylpenicillin            | powder for injection (600mg)                              | \$3.04         | BNF             |                          | \$0.10            | TN                 |                      |                                             |
| bevacizumab                 | 1mL injection (25mg)                                      | \$78.86        | BNF             |                          | \$63.57           | TN                 |                      |                                             |
| biperiden                   | 1ml ampoule (5mg)                                         |                |                 |                          |                   |                    |                      |                                             |
| bleomycin                   | powder for injection (15mg)                               | \$24.78        | BNF             |                          | \$4.60            | TN                 |                      |                                             |
| bupivacaine                 | 1mL injection (2.5mg)                                     | \$0.11         | eMIT            |                          | \$0.02            | P                  | \$0.00051            | \$0.60568                                   |
| bupivacaine                 | 4mL ampoule (20mg, with glucose)                          |                |                 | \$0.21                   | \$0.23            | P                  | \$0.00411            | \$0.24747                                   |
| bupivacaine                 | 1mL injection (5mg)                                       | \$0.09         | eMIT            | \$0.02                   | \$0.01            | TN                 | \$0.00103            | \$0.60637                                   |
| caffeine citrate            | 1mL injection (20mg)                                      | \$5.70         | eMIT            |                          |                   |                    | \$0.00030            | \$0.60540                                   |
| calcium folinate            | 10mL ampoule (30mg)                                       | \$6.01         | BNF             |                          | \$1.87            | P                  |                      |                                             |
| calcium gluconate           | 10mL ampoule (1000mg)                                     | \$0.65         | eMIT            | \$0.36                   | \$0.11            | P                  | \$0.01106            | \$0.25672                                   |
| capreomycin                 | powder for injection (1000mg)                             | \$37.19        | BNF             | \$7.16                   | \$3.93            | P                  |                      |                                             |
| carboplatin                 | 60mL injection (600mg)                                    | \$32.83        | eMIT            | \$45.76                  | \$22.80           | TN                 | \$17.23615           | \$23.54631                                  |
| carboplatin                 | 15mL injection (150mg)                                    | \$9.91         | eMIT            | \$11.44                  | \$5.70            | TN                 | \$4.30904            | \$6.34033                                   |

|    |                |                                 |          |      |         |         |    |            |            |
|----|----------------|---------------------------------|----------|------|---------|---------|----|------------|------------|
| 1  |                |                                 |          |      |         |         |    |            |            |
| 2  |                |                                 |          |      |         |         |    |            |            |
| 3  | carboplatin    | 45mL injection (450mg)          | \$24.78  | eMIT | \$30.01 | \$15.81 | TN | \$12.92711 | \$17.81099 |
| 4  | carboplatin    | 5mL injection (50mg)            | \$4.64   | eMIT | \$3.81  | \$1.76  | TN | \$1.43635  | \$2.51678  |
| 5  | cefazolin      | powder for injection (1000mg)   |          |      | \$0.53  | \$0.26  | TN | \$0.15187  | \$0.80714  |
| 6  | cefotaxime     | powder for injection (250mg)    | \$1.31   | eMIT | \$0.15  | \$0.06  | TN | \$0.02734  | \$0.64139  |
| 7  | ceftazidime    | powder for injection (1000mg)   | \$0.99   | eMIT | \$1.77  | \$0.36  | P  | \$0.43097  | \$1.17863  |
| 8  | ceftazidime    | powder for injection (250mg)    | \$1.77   | eMIT | \$0.44  | \$0.36  | P  | \$0.10774  | \$0.74841  |
| 9  | ceftriaxone    | powder for injection (1000mg)   | \$0.64   | eMIT | \$0.44  | \$0.15  | TN | \$0.19035  | \$0.85836  |
| 10 | ceftriaxone    | powder for injection (250mg)    | \$1.43   | eMIT | \$0.27  | \$0.08  | TN | \$0.04759  | \$0.66834  |
| 11 | chloramphenico |                                 |          |      |         |         |    |            |            |
| 12 | l              | 2mL ampoule (1000mg)            |          |      |         | \$0.14  | P  | \$0.15906  | \$0.45370  |
| 13 | chloramphenico |                                 |          |      |         |         |    |            |            |
| 14 | l              | powder for injection (1000mg)   | \$1.81   | BNF  |         | \$0.14  | P  | \$0.15906  | \$0.81670  |
| 15 | chlorpromazine | 2mL ampoule (50mg)              | \$0.92   | eMIT |         | \$0.03  | P  | \$0.00429  | \$0.24772  |
| 16 | chlorpromazine | 2mL ampoule (50mg)              | \$0.92   | eMIT |         | \$0.03  | P  | \$0.00429  | \$0.24772  |
| 17 | ciclosporin    | 1mL ampoule (50mg)              | \$3.02   | BNF  | \$1.72  | \$1.71  | P  | \$0.06771  | \$0.33212  |
| 18 | ciprofloxacin  | 1mL solution for infusion (2mg) | \$0.01   | eMIT |         | \$0.00  | TN | \$0.00051  | \$0.60568  |
| 19 | cisplatin      | 100mL injection (100mg)         | \$13.73  | eMIT | \$8.84  | \$5.14  | P  | \$3.88629  | \$5.77765  |
| 20 | cisplatin      | 50mL injection (50mg)           | \$9.09   | eMIT | \$4.42  | \$2.57  | P  | \$1.94314  | \$3.19133  |
| 21 | clindamycin    | 1mL injection (150mg)           | \$0.37   | eMIT |         | \$1.21  | P  |            |            |
| 22 | cloxacillin    | powder for injection (500mg)    |          |      | \$0.89  | \$0.12  | TN | \$0.01268  | \$0.62188  |
| 23 | cyclizine      | 1mL injection (50mg)            | \$2.11   | eMIT |         |         |    | \$0.00419  | \$0.61057  |
| 24 | cyclophosphami |                                 |          |      |         |         |    |            |            |
| 25 | de             | powder for injection (500mg)    | \$11.53  | eMIT | \$5.04  | \$0.50  | TN | \$0.78130  | \$1.64490  |
| 26 | cytarabine     | powder for injection (100mg)    | \$3.99   | eMIT | \$1.80  | \$0.05  | TN | \$0.13341  | \$0.78257  |
| 27 | dacarbazine    | powder for injection (100mg)    | \$5.42   | eMIT |         | \$1.01  | TN | \$0.33923  | \$1.05652  |
| 28 | dactinomycin   | powder for injection (500mcg)   |          |      |         | \$5.87  | P  |            |            |
| 29 | daunorubicin   | powder for injection (50mg)     | \$211.25 | BNF  | \$10.03 | \$2.78  | TN | \$1.70665  | \$2.87655  |
| 30 | deferoxamine   | injection (500mg)               | \$5.19   | BNF  | \$0.47  | \$2.12  | TN |            |            |
| 31 | deferoxamine   | powder for injection (500mg)    | \$5.19   | BNF  | \$0.47  | \$2.12  | TN |            |            |
| 32 | desmopressin   | 1mL ampoule (4mcg)              | \$1.46   | eMIT |         |         |    | \$0.00112  | \$0.24349  |
| 33 | dexamethasone  | 1mL ampoule (4mg)               |          |      | \$0.21  | \$0.02  | TN | \$0.00790  | \$0.25252  |
| 34 | dexamethasone  | 1mL ampoule (4mg)               |          |      | \$0.21  | \$0.02  | TN | \$0.00790  | \$0.25252  |
| 35 | dexamethasone  | 1mL ampoule (4mg)               |          |      | \$0.21  | \$0.02  | TN | \$0.00790  | \$0.25252  |
| 36 | dexamethasone  | 1mL ampoule (4mg)               |          |      | \$0.21  | \$0.02  | TN | \$0.00790  | \$0.25252  |
| 37 | dexamethasone  | 1mL ampoule (4mg)               |          |      | \$0.21  | \$0.02  | TN | \$0.00790  | \$0.25252  |
| 38 | diazepam       | 1mL injection (5mg)             | \$0.25   | eMIT | \$0.06  | \$0.02  | TN | \$0.00065  | \$0.60587  |
| 39 | digoxin        | 2mL ampoule (500mcg)            | \$0.60   | eMIT | \$2.44  | \$0.06  | P  | \$0.00354  | \$0.24671  |
| 40 | dimercaprol    | 2mL ampoule (100mg)             |          |      |         | \$1.50  | P  |            |            |
| 41 | docetaxel      | injection (20mg)                | \$3.30   | eMIT | \$21.70 | \$1.45  | TN | \$2.71104  | \$4.21340  |
| 42 | docetaxel      | injection (40mg)                |          |      | \$34.29 | \$2.90  | TN | \$5.42209  | \$7.82180  |
| 43 | dopamine       | 5mL vial (200mg)                | \$0.68   | eMIT | \$0.26  | \$0.09  | TN | \$0.05528  | \$0.67858  |
| 44 | doxorubicin    | powder for injection (10mg)     | \$1.99   | eMIT | \$1.70  | \$0.50  | TN | \$0.45249  | \$1.20727  |
| 45 | doxorubicin    | powder for injection (50mg)     | \$5.25   | eMIT | \$5.06  | \$1.13  | TN | \$2.26247  | \$3.61635  |
| 46 | eflornithine   | 100mL injection (20g)           |          |      |         |         |    | \$27.83990 | \$37.65990 |
| 47 | ephedrine      | 1mL ampoule (30mg)              | \$0.52   | eMIT |         | \$0.10  | TN | \$0.00184  | \$0.24445  |
| 48 |                |                                 |          |      |         |         |    |            |            |
| 49 |                |                                 |          |      |         |         |    |            |            |
| 50 |                |                                 |          |      |         |         |    |            |            |
| 51 |                |                                 |          |      |         |         |    |            |            |
| 52 |                |                                 |          |      |         |         |    |            |            |
| 53 |                |                                 |          |      |         |         |    |            |            |
| 54 |                |                                 |          |      |         |         |    |            |            |
| 55 |                |                                 |          |      |         |         |    |            |            |
| 56 |                |                                 |          |      |         |         |    |            |            |
| 57 |                |                                 |          |      |         |         |    |            |            |
| 58 |                |                                 |          |      |         |         |    |            |            |
| 59 |                |                                 |          |      |         |         |    |            |            |
| 60 |                |                                 |          |      |         |         |    |            |            |

|    |                |                              |          |      |         |         |    |            |            |
|----|----------------|------------------------------|----------|------|---------|---------|----|------------|------------|
| 1  |                |                              |          |      |         |         |    |            |            |
| 2  |                |                              |          |      |         |         |    |            |            |
| 3  | epinephrine    | 10mL ampoule (1mg)           | \$6.97   | eMIT |         |         |    | \$0.01878  | \$0.26699  |
| 4  | (adrenaline)   |                              |          |      |         |         |    |            |            |
| 5  | epinephrine    | 1mL ampoule (1mg)            | \$0.20   | eMIT |         | \$0.03  | TN | \$0.01878  | \$0.26699  |
| 6  | (adrenaline)   |                              |          |      |         |         |    |            |            |
| 7  | epinephrine    | 1mL ampoule (1mg)            | \$0.20   | eMIT |         | \$0.03  | TN | \$0.01878  | \$0.26699  |
| 8  | (adrenaline)   |                              |          |      |         |         |    |            |            |
| 9  | ergometrine    | 1ml ampoule (0.2mg)          |          |      |         | \$0.03  | P  |            |            |
| 10 | erythromycin   | powder for injection (500mg) | \$11.12  | eMIT |         |         |    |            |            |
| 11 | estradiol      |                              |          |      |         |         |    |            |            |
| 12 | cypionate +    |                              |          |      |         |         |    |            |            |
| 13 | medroxyprogest |                              |          |      |         |         |    |            |            |
| 14 | erone acetate  | injection (5mg + 25mg)       |          |      |         |         |    |            |            |
| 15 | etoposide      | 5mL ampoule (100mg)          | \$3.47   | eMIT | \$3.66  | \$0.97  | TN | \$0.84629  | \$1.36841  |
| 16 | filgrastim     | 1.6mL vial (480mcg)          |          |      |         |         |    | \$0.00392  | \$0.61022  |
| 17 | filgrastim     | 1mL vial (300mcg)            | \$68.52  | BNF  | \$28.15 | \$15.71 | P  | \$0.00245  | \$0.60826  |
| 18 | fluconazole    | 1mL vial (2mg)               | \$0.01   | eMIT |         | \$0.00  | TN | \$0.00028  | \$0.60538  |
| 19 | flucytosine    | 250mL infusion (2.5g)        | \$39.43  | BNF  |         |         |    | \$3.44262  | \$5.18712  |
| 20 | fludarabine    | vial (50mg)                  | \$30.46  | eMIT | \$42.03 | \$20.50 | TN |            |            |
| 21 | fluorouracil   | 5mL ampoule (250mg)          | \$0.60   | eMIT |         | \$0.10  | P  |            |            |
| 22 | fluphenazine   | 1mL ampoule (25mg)           | \$2.78   | eMIT | \$2.30  | \$0.34  | P  | \$0.05980  | \$0.32160  |
| 23 | fomepizole     | 1.5mL ampoule (1500mg)       |          |      |         |         |    | \$26.92838 | \$36.08368 |
| 24 | furosemide     | 2mL ampoule (20mg)           | \$0.12   | eMIT | \$0.07  | \$0.02  | TN | \$0.00075  | \$0.24300  |
| 25 | furosemide     | 2mL ampoule (20mg)           | \$0.12   | eMIT | \$0.07  | \$0.02  | TN | \$0.00075  | \$0.24300  |
| 26 | gemcitabine    | vial (1000mg)                | \$40.16  | eMIT | \$20.20 | \$4.71  | TN | \$4.36964  | \$6.42099  |
| 27 | gemcitabine    | vial (200mg)                 | \$5.19   | eMIT | \$5.02  | \$0.94  | TN | \$0.87393  | \$1.76820  |
| 28 | gentamicin     | 2mL vial (20mg)              | \$1.43   | eMIT |         | \$0.04  | P  |            |            |
| 29 | gentamicin     | 2mL vial (80mg)              | \$0.78   | eMIT | \$0.23  | \$0.04  | TN |            |            |
| 30 | glucagon       | 1mL injection (1mg)          | \$14.98  | BNF  | \$19.51 | \$1.64  | P  |            |            |
| 31 | haloperidol    | 1mL ampoule (5mg)            | \$1.40   | eMIT |         | \$0.02  | TN | \$0.00166  | \$0.24420  |
| 32 | haloperidol    | 1mL ampoule (5mg)            | \$1.40   | eMIT |         | \$0.02  | TN | \$0.00166  | \$0.24420  |
| 33 | haloperidol    | 1mL ampoule (5mg)            | \$1.40   | eMIT |         | \$0.02  | TN | \$0.00166  | \$0.24420  |
| 34 | heparin sodium | 1mL ampoule (133.3mg)        |          |      |         |         |    | \$1.69772  | \$2.50167  |
| 35 | heparin sodium | 1mL ampoule (6.7mg)          | \$0.99   | eMIT | \$0.17  | \$0.02  | P  | \$0.08533  | \$0.35558  |
| 36 | heparin sodium | 1mL ampoule (6.7mg)          | \$0.99   | eMIT | \$0.17  | \$0.02  | P  | \$0.08533  | \$0.35558  |
| 37 | heparin sodium | 1mL ampoule (33.3mg)         | \$2.09   | eMIT | \$0.28  | \$0.14  | TN | \$0.42411  | \$0.80649  |
| 38 | heparin sodium | 1mL ampoule (33.3mg)         | \$2.09   | eMIT | \$0.28  | \$0.14  | TN | \$0.42411  | \$0.80649  |
| 39 | hydralazine    | powder for injection (20mg)  | \$2.88   | BNF  |         |         |    | \$0.00777  | \$0.25234  |
| 40 | hydrocortisone | powder for injection (100mg) |          |      | \$0.78  | \$0.48  | P  | \$0.09166  | \$0.72700  |
| 41 | hydrocortisone | powder for injection (100mg) |          |      | \$0.78  | \$0.48  | P  | \$0.09166  | \$0.72700  |
| 42 | hydroxocobala  |                              |          |      |         |         |    |            |            |
| 43 | min            | 1mL ampoule (1mg)            | \$1.15   | eMIT |         |         |    |            |            |
| 44 | hyoscine       |                              |          |      |         |         |    |            |            |
| 45 | hydrobromide   | injection (600mcg)           | \$1.33   | eMIT |         |         |    | \$0.00239  | \$0.24518  |
| 46 | hyoscine       |                              |          |      |         |         |    |            |            |
| 47 | hydrobromide   | injection (400mcg)           | \$1.10   | eMIT |         |         |    | \$0.00159  | \$0.24412  |
| 48 | ibuprofen      | 1mL injection (5mg)          | \$46.80  | BNF  |         |         |    | \$0.00005  | \$0.60507  |
| 49 | ifosfamide     | powder for injection (1g)    | \$118.72 | BNF  | \$28.71 | \$2.33  | TN | \$1.31204  | \$2.35133  |
| 50 | ifosfamide     | powder for injection (2g)    | \$233.84 | BNF  | \$48.71 | \$4.65  | TN | \$2.62408  | \$4.09765  |
| 51 |                |                              |          |      |         |         |    |            |            |
| 52 |                |                              |          |      |         |         |    |            |            |
| 53 |                |                              |          |      |         |         |    |            |            |
| 54 |                |                              |          |      |         |         |    |            |            |
| 55 |                |                              |          |      |         |         |    |            |            |
| 56 |                |                              |          |      |         |         |    |            |            |
| 57 |                |                              |          |      |         |         |    |            |            |
| 58 |                |                              |          |      |         |         |    |            |            |
| 59 |                |                              |          |      |         |         |    |            |            |
| 60 |                |                              |          |      |         |         |    |            |            |

|    |                                      |                                         |          |      |         |          |    |           |           |
|----|--------------------------------------|-----------------------------------------|----------|------|---------|----------|----|-----------|-----------|
| 1  | ifosfamide                           | powder for injection (500mg)            | \$59.35  | BNF  | \$17.22 | \$1.16   | TN | \$0.65602 | \$1.47816 |
| 2  |                                      |                                         |          |      |         |          |    |           |           |
| 3  | imipenem + cilastatin                | powder for injection (500mg + 500mg)    | \$3.30   | eMIT | \$3.12  | \$11.86  | P  |           |           |
| 4  |                                      |                                         |          |      |         |          |    |           |           |
| 5  | imipenem + cilastatin                | powder for injection (250mg + 250mg)    |          |      | \$1.56  | \$8.50   | P  |           |           |
| 6  |                                      |                                         |          |      |         |          |    |           |           |
| 7  | insulin injection (soluble)          | 10mL injection (13.9mg)                 |          |      |         | \$0.79   | TN | \$0.46524 | \$1.22423 |
| 8  |                                      |                                         |          |      |         |          |    |           |           |
| 9  | insulin injection (soluble)          | 10mL injection (34.7mg)                 | \$9.72   | BNF  | \$1.83  | \$5.80   | P  | \$1.16309 | \$2.15308 |
| 10 |                                      |                                         |          |      |         |          |    |           |           |
| 11 | intermediate-acting insulin          | 10mL injection (13.9mg)                 |          |      |         | \$0.79   | TN |           |           |
| 12 |                                      |                                         |          |      |         |          |    |           |           |
| 13 | intermediate-acting insulin          | 10mL injection (34.7mg)                 | \$9.72   | BNF  | \$1.83  | \$4.19   | P  |           |           |
| 14 |                                      |                                         |          |      |         |          |    |           |           |
| 15 | irinotecan                           | 5mL vial (100mg)                        | \$143.81 | BNF  |         | \$21.43  | P  | \$0.42618 | \$1.17225 |
| 16 |                                      |                                         |          |      |         |          |    |           |           |
| 17 | irinotecan                           | 25mL vial (500mg)                       | \$46.83  | eMIT |         | \$107.14 | P  | \$2.13090 | \$3.44123 |
| 18 |                                      |                                         |          |      |         |          |    |           |           |
| 19 | irinotecan                           | 2mL vial (40mg)                         | \$5.58   | eMIT |         | \$10.71  | P  | \$0.17047 | \$0.83190 |
| 20 |                                      |                                         |          |      |         |          |    |           |           |
| 21 | kanamycin                            | powder for injection (1g)               |          |      |         | \$0.43   | P  |           |           |
| 22 |                                      |                                         |          |      |         |          |    |           |           |
| 23 | ketamine                             | 10mL vial (500mg)                       | \$9.10   | BNF  | \$2.30  | \$0.07   | P  | \$0.14269 | \$0.79492 |
| 24 |                                      |                                         |          |      |         |          |    |           |           |
| 25 | lidocaine                            | 2mL ampoule (100mg lidocaine + glucose) |          |      |         | \$0.06   | P  | \$0.00016 | \$0.24222 |
| 26 |                                      |                                         |          |      |         |          |    |           |           |
| 27 | lidocaine                            | 5mL ampoule (100mg)                     | \$0.26   | eMIT |         | \$0.02   | P  | \$0.00162 | \$0.24416 |
| 28 |                                      |                                         |          |      |         |          |    |           |           |
| 29 | lidocaine                            | vial (10mg)                             | \$0.05   | BNF  | \$0.40  | \$0.00   | P  | \$0.00016 | \$0.60522 |
| 30 |                                      |                                         |          |      |         |          |    |           |           |
| 31 | lidocaine                            | vial (20mg)                             | \$0.06   | BNF  | \$0.14  | \$0.00   | P  | \$0.00032 | \$0.60543 |
| 32 |                                      |                                         |          |      |         |          |    |           |           |
| 33 | lidocaine + epinephrine (adrenaline) | vial (10mg + 0.005mg)                   | \$0.13   | BNF  |         |          |    | \$0.00026 | \$0.60534 |
| 34 |                                      |                                         |          |      |         |          |    |           |           |
| 35 | lidocaine + epinephrine (adrenaline) | vial (20mg + 0.005mg)                   | \$0.12   | BNF  |         |          |    | \$0.00042 | \$0.60556 |
| 36 |                                      |                                         |          |      |         |          |    |           |           |
| 37 | lorazepam                            | 1mL ampoule (2mg)                       |          |      |         | \$0.06   | TN | \$0.00147 | \$0.24395 |
| 38 |                                      |                                         |          |      |         |          |    |           |           |
| 39 | lorazepam                            | 1mL ampoule (4mg)                       | \$0.46   | BNF  |         | \$0.21   | P  | \$0.00294 | \$0.24591 |
| 40 |                                      |                                         |          |      |         |          |    |           |           |
| 41 | magnesium sulfate                    | 10mL ampoule (5g)                       | \$0.73   | eMIT | \$1.36  | \$0.09   | TN | \$0.01335 | \$0.25978 |
| 42 |                                      |                                         |          |      |         |          |    |           |           |
| 43 | magnesium sulfate                    | 2mL ampoule (1g)                        | \$0.42   | eMIT | \$0.27  | \$0.02   | TN | \$0.00267 | \$0.24556 |
| 44 |                                      |                                         |          |      |         |          |    |           |           |
| 45 | mannitol                             | 1mL solution (100mg)                    | \$0.01   | BNF  |         | \$0.00   | P  | \$0.00069 | \$0.60592 |
| 46 |                                      |                                         |          |      |         |          |    |           |           |
| 47 | mannitol                             | 1mL solution (100mg)                    | \$0.01   | BNF  |         | \$0.00   | P  | \$0.00069 | \$0.60592 |
| 48 |                                      |                                         |          |      |         |          |    |           |           |
| 49 | mannitol                             | 1mL solution (200mg)                    | \$0.02   | BNF  | \$0.01  | \$0.01   | P  | \$0.00138 | \$0.60683 |
| 50 |                                      |                                         |          |      |         |          |    |           |           |
| 51 | mannitol                             | 1mL solution (200mg)                    | \$0.02   | BNF  | \$0.00  | \$0.01   | P  | \$0.00138 | \$0.60683 |
| 52 |                                      |                                         |          |      |         |          |    |           |           |
| 53 | medroxyprogesterone acetate          | 1mL vial (150mg)                        | \$7.81   | BNF  | \$0.42  | \$3.32   | P  |           |           |
| 54 |                                      |                                         |          |      |         |          |    |           |           |
| 55 | meglumine antimoniate                |                                         | 0        |      |         |          |    |           |           |
| 56 |                                      |                                         |          |      |         |          |    |           |           |
| 57 | melarsoprol                          | 5mL ampoule (180mg)                     |          |      |         |          |    |           |           |
| 58 |                                      |                                         |          |      |         |          |    |           |           |
| 59 | melarsoprol                          | 5mL ampoule (180mg)                     |          |      |         |          |    |           |           |
| 60 |                                      |                                         |          |      |         |          |    |           |           |
| 61 | mesna                                | 10mL ampoule (1000mg)                   | \$38.23  | BNF  |         | \$0.88   | TN | \$0.66591 | \$1.12833 |
| 62 |                                      |                                         |          |      |         |          |    |           |           |
| 63 | mesna                                | 4mL ampoule (400mg)                     | \$17.43  | BNF  | \$2.40  | \$0.35   | TN | \$0.26636 | \$0.59653 |
| 64 |                                      |                                         |          |      |         |          |    |           |           |
| 65 | methotrexate                         | powder for injection (50mg)             | \$1.83   | eMIT | \$1.93  | \$0.26   | TN | \$4.04570 | \$5.98983 |
| 66 |                                      |                                         |          |      |         |          |    |           |           |
| 67 | methylprednisolone                   | 5mL vial (200mg)                        |          |      |         |          |    | \$0.56616 | \$1.35856 |

|    |                                          |                              |          |      |         |         |    |            |            |
|----|------------------------------------------|------------------------------|----------|------|---------|---------|----|------------|------------|
| 1  | methylprednisolone                       | 1mL vial (80mg)              |          |      |         | \$0.61  | P  | \$0.22647  | \$0.90643  |
| 2  |                                          |                              |          |      |         |         |    |            |            |
| 3  | methylprednisolone                       | 1mL vial (40mg)              | \$1.79   | eMIT | \$1.20  | \$0.22  | P  | \$0.11323  | \$0.75571  |
| 4  |                                          |                              |          |      |         |         |    |            |            |
| 5  | methylthionium chloride (methylene blue) | 10mL ampoule (100mg)         |          |      |         |         |    |            |            |
| 6  |                                          |                              |          |      |         |         |    |            |            |
| 7  | metoclopramide                           | 2mL ampoule (10mg)           | \$0.15   | eMIT | \$0.11  | \$0.02  | TN | \$0.00086  | \$0.24315  |
| 8  | metoclopramide                           | 2mL ampoule (10mg)           | \$0.15   | eMIT | \$0.11  | \$0.02  | TN | \$0.00086  | \$0.24315  |
| 9  | metronidazole                            | 100mL vial (500mg)           | \$0.47   | eMIT |         | \$0.09  | TN | \$0.00616  | \$0.61320  |
| 10 | metronidazole                            | 100mL vial (500mg)           | \$0.47   | eMIT |         | \$0.09  | TN | \$0.00616  | \$0.61320  |
| 11 | midazolam                                | 1mL injection (5mg)          | \$0.08   | eMIT | \$0.17  | \$0.09  | P  | \$0.02628  | \$0.63998  |
| 12 | midazolam                                | 1mL injection (1mg)          | \$0.11   | eMIT | \$0.06  | \$0.03  | TN | \$0.00526  | \$0.61200  |
| 13 | midazolam                                | 1mL injection (1mg)          | \$0.11   | eMIT | \$0.06  | \$0.03  | TN | \$0.00526  | \$0.61200  |
| 14 | morphine                                 | 1mL ampoule (10mg)           | \$0.16   | eMIT | \$0.13  | \$0.10  | TN |            |            |
| 15 | morphine                                 | 1mL ampoule (10mg)           | \$0.16   | eMIT | \$0.13  | \$0.10  | TN |            |            |
| 16 | naloxone                                 | 1mL ampoule (400mcg)         | \$0.43   | eMIT | \$0.21  | \$0.99  | TN |            |            |
| 17 | neostigmine                              | 1mL ampoule (500mcg)         |          |      | \$0.26  | \$0.02  | TN | \$0.01352  | \$0.25999  |
| 18 | neostigmine                              | 1mL ampoule (2.5mg)          | \$0.53   | eMIT | \$0.15  | \$0.32  | P  | \$0.06758  | \$0.33194  |
| 19 | norethisterone enantate                  | 1mL ampoule (200mg)          | \$5.27   | BNF  | \$0.72  | \$1.98  | P  |            |            |
| 20 | omeprazole                               | powder for injection (40mg)  | \$1.23   | eMIT |         | \$0.16  | TN | \$0.00055  | \$0.60573  |
| 21 | ondansetron                              | 2mL ampoule (4mg)            | \$0.11   | eMIT | \$0.30  | \$0.02  | TN | \$0.00445  | \$0.24792  |
| 22 | ondansetron                              | 2mL ampoule (4mg)            | \$0.11   | eMIT | \$0.30  | \$0.02  | TN | \$0.00445  | \$0.24792  |
| 23 | oxaliplatin                              | 40mL vial (200mg)            | \$40.30  | eMIT |         |         |    | \$12.77141 | \$17.60375 |
| 24 | oxaliplatin                              | 20mL vial (100mg)            | \$20.15  | eMIT | \$59.76 |         |    | \$6.38571  | \$9.10438  |
| 25 | oxaliplatin                              | powder for injection (100mg) | \$20.15  | eMIT | \$59.76 | \$6.21  | TN | \$6.38571  | \$9.10438  |
| 26 | oxaliplatin                              | powder for injection (50mg)  | \$13.81  | eMIT | \$29.88 | \$3.10  | TN | \$3.19285  | \$4.85469  |
| 27 | oxytocin                                 | 1mL ampoule (25mcg)          | \$0.91   | eMIT | \$0.32  | \$0.09  | TN | \$0.00134  | \$0.24378  |
| 28 | paclitaxel                               | powder for injection (1mg)   | \$0.09   | eMIT | \$0.22  | \$0.04  | TN | \$0.04273  | \$0.66188  |
| 29 | paromomycin                              | injection (750mg)            |          |      |         |         |    |            |            |
| 30 | pegylated interferon alfa (2a or 2b)     | injection (100mcg)           | \$172.80 | BNF  |         | \$48.91 | TN |            |            |
| 31 | pegylated interferon alfa (2a or 2b)     | injection (180mcg)           | \$161.72 | BNF  |         | \$46.43 | TN |            |            |
| 32 | pegylated interferon alfa (2a or 2b)     | injection (80mcg)            | \$138.24 | BNF  |         | \$39.13 | TN |            |            |
| 33 | pentamidine                              | powder for injection (200mg) | \$27.54  | BNF  |         |         |    |            |            |
| 34 | phenobarbital                            | 1mL injection (200mg)        | \$7.32   | eMIT |         | \$0.20  | P  | \$0.01656  | \$0.26404  |
| 35 | phenytoin                                | 5mL vial (250mg)             | \$0.85   | eMIT | \$1.34  | \$0.09  | TN | \$0.00475  | \$0.61133  |
| 36 | phytomenadione                           | 5mL ampoule (50mg)           | \$2.46   | BNF  |         | \$0.36  | P  |            |            |
| 37 | phytomenadione                           | 5mL ampoule (5mg)            |          |      |         |         |    |            |            |

|    |                                                |                                    |            |      |          |        |    |                         |
|----|------------------------------------------------|------------------------------------|------------|------|----------|--------|----|-------------------------|
| 1  |                                                |                                    |            |      |          |        |    |                         |
| 2  |                                                |                                    |            |      |          |        |    |                         |
| 3  | procaine benzylpenicillin                      | powder for injection (1g)          |            |      |          |        |    |                         |
| 4  | procaine benzylpenicillin                      | powder for injection (3g)          |            |      |          |        |    |                         |
| 5  |                                                |                                    |            |      |          | \$0.49 | P  |                         |
| 6  | propofol                                       | 1mL injection (20mg)               | \$0.05     | eMIT |          | \$0.17 | P  | \$0.00226 \$0.60800     |
| 7  | propofol                                       | 1mL injection (10mg)               | \$0.03     | eMIT | \$0.02   | \$0.03 | TN | \$0.00113 \$0.60650     |
| 8  | prostaglandin E1                               | 1mL solution for injection (0.5mg) |            |      |          |        |    |                         |
| 9  | prostaglandin E2                               | 1mL solution for injection (1mg)   |            |      |          |        |    |                         |
| 10 | protamine sulfate                              | 5mL ampoule (50mg)                 | \$6.44     | BNF  | \$4.08   | \$0.08 | P  |                         |
| 11 | protamine sulfate                              | 5mL ampoule (50mg)                 | \$6.44     | BNF  | \$4.08   | \$0.08 | P  |                         |
| 12 | pyridostigmine                                 | 1mL ampoule (1mg)                  |            |      |          |        |    |                         |
| 13 | quinine                                        | 2mL ampoule (600mg)                |            |      | \$1.10   | \$0.11 | P  | \$0.07719 \$0.34474     |
| 14 | ranitidine                                     | 2mL ampoule (50mg)                 | \$0.48     | eMIT | \$0.49   | \$0.01 | TN | \$0.00105 \$0.24340     |
| 15 | ribavirin                                      | 10mL solution (800mg)              |            |      |          |        |    | \$0.09776 \$0.73512     |
| 16 | ribavirin                                      | 10mL solution (800mg)              |            |      |          |        |    | \$0.09776 \$0.73512     |
| 17 | ribavirin                                      | 10mL solution (1g)                 |            |      |          |        |    | \$0.12220 \$0.76765     |
| 18 | ribavirin                                      | 10mL solution (1g)                 |            |      |          |        |    | \$0.12220 \$0.76765     |
| 19 | rituximab                                      | 50mL vial (500mg)                  | \$1,135.10 | BNF  | \$518.48 |        |    | \$336.88802 \$449.00296 |
| 20 | rituximab                                      | 10mL vial (100mg)                  | \$227.01   | BNF  | \$103.70 |        |    | \$67.37760 \$90.28459   |
| 21 | salbutamol                                     | 5mL ampoule (50mcg)                |            |      |          |        |    | \$0.00001 \$0.24201     |
| 22 | sodium calcium edetate                         | 5mL ampoule (1000mg)               |            |      |          |        |    | \$0.00334 \$0.24644     |
| 23 | sodium nitrite                                 | 10mL ampoule (300mg)               |            |      |          |        |    | \$0.00038 \$0.24250     |
| 24 | sodium nitroprusside                           | powder for injection (50mg)        |            |      |          | \$0.64 | P  | \$0.00784 \$0.25244     |
| 25 | sodium stibogluconate                          | 30mL vial (3g)                     | \$25.91    | BNF  |          |        |    |                         |
| 26 | sodium stibogluconate or meglumine antimoniate | N/A                                |            |      |          |        |    |                         |
| 27 | sodium thiosulfate                             | 50mL ampoule (12500mg)             |            |      |          |        |    | \$0.02574 \$0.27625     |
| 28 | spectinomycin                                  | powder for injection (2g)          |            |      |          | \$2.86 | P  |                         |
| 29 | streptokinase                                  | powder for injection (15.6mg)      | \$101.97   | eMIT | \$223.93 | \$3.65 | P  | \$14.27110 \$19.59983   |
| 30 | streptomycin                                   | powder for injection (1000mg)      |            |      | \$0.29   | \$0.06 | P  |                         |
| 31 | streptomycin                                   | powder for injection (1000mg)      |            |      | \$0.29   | \$0.06 | P  |                         |
| 32 | sulfamethoxazole + trimethoprim                | 5mL ampoule (400mg+80mg)           | \$2.31     | BNF  |          |        |    | \$0.00659 \$0.25077     |
| 33 | sulfamethoxazole + trimethoprim                | 5mL ampoule (400mg+80mg)           | \$2.31     | BNF  |          |        |    | \$0.00659 \$0.25077     |
| 34 |                                                |                                    |            |      |          |        |    |                         |
| 35 |                                                |                                    |            |      |          |        |    |                         |
| 36 |                                                |                                    |            |      |          |        |    |                         |
| 37 |                                                |                                    |            |      |          |        |    |                         |
| 38 |                                                |                                    |            |      |          |        |    |                         |
| 39 |                                                |                                    |            |      |          |        |    |                         |
| 40 |                                                |                                    |            |      |          |        |    |                         |
| 41 |                                                |                                    |            |      |          |        |    |                         |
| 42 |                                                |                                    |            |      |          |        |    |                         |
| 43 |                                                |                                    |            |      |          |        |    |                         |
| 44 |                                                |                                    |            |      |          |        |    |                         |
| 45 |                                                |                                    |            |      |          |        |    |                         |
| 46 |                                                |                                    |            |      |          |        |    |                         |
| 47 |                                                |                                    |            |      |          |        |    |                         |
| 48 |                                                |                                    |            |      |          |        |    |                         |
| 49 |                                                |                                    |            |      |          |        |    |                         |
| 50 |                                                |                                    |            |      |          |        |    |                         |
| 51 |                                                |                                    |            |      |          |        |    |                         |
| 52 |                                                |                                    |            |      |          |        |    |                         |
| 53 |                                                |                                    |            |      |          |        |    |                         |
| 54 |                                                |                                    |            |      |          |        |    |                         |
| 55 |                                                |                                    |            |      |          |        |    |                         |
| 56 |                                                |                                    |            |      |          |        |    |                         |
| 57 |                                                |                                    |            |      |          |        |    |                         |
| 58 |                                                |                                    |            |      |          |        |    |                         |
| 59 |                                                |                                    |            |      |          |        |    |                         |
| 60 |                                                |                                    |            |      |          |        |    |                         |



|                                  |                              |          |      |         |          |    |           |           |
|----------------------------------|------------------------------|----------|------|---------|----------|----|-----------|-----------|
| sulfamethoxazole + trimethoprim  | 10mL ampoule (800mg+160mg)   | \$4.62   | BNF  |         |          |    | \$0.01317 | \$0.25953 |
| suramin sodium                   | powder for injection (1g)    |          |      |         |          |    |           |           |
| suxamethonium                    |                              | 0        |      |         |          |    | \$0.00000 | \$0.60500 |
| suxamethonium                    | 2mL ampoule (100mg)          | \$0.86   | eMIT |         | \$0.12   | P  | \$0.05053 | \$0.30925 |
| testosterone                     | 1mL ampoule (200mg)          |          |      |         | \$1.34   | P  | \$0.02237 | \$0.27178 |
| tranexamic acid                  | 10mL ampoule (1000mg)        | \$3.90   | BNF  | \$8.47  | \$0.54   | P  | \$0.09442 | \$0.36767 |
| trastuzumab                      | powder for injection (150mg) | \$529.62 | BNF  |         |          |    |           |           |
| trastuzumab                      | powder for injection (440mg) |          |      |         |          |    |           |           |
| trastuzumab                      | powder for injection (60mg)  |          |      |         |          |    |           |           |
| valproic acid (sodium valproate) | 10mL ampoule (1g)            |          |      |         | \$2.86   | P  | \$0.02628 | \$0.27698 |
| valproic acid (sodium valproate) | 4mL ampoule (400mg)          | \$5.09   | eMIT |         | \$1.14   | P  | \$0.01051 | \$0.25599 |
| vancomycin                       | powder for injection (250mg) | \$0.72   | eMIT | \$0.88  | \$0.28   | TN | \$0.22748 | \$0.90777 |
| vecuronium                       | powder for injection (10mg)  | \$4.38   | BNF  |         | \$1.05   | TN |           |           |
| vecuronium                       | powder for injection (10mg)  | \$4.38   | BNF  |         | \$1.05   | TN |           |           |
| verapamil                        | 2mL ampoule (5mg)            | \$1.41   | BNF  |         |          |    | \$0.00039 | \$0.24252 |
| vinblastine                      | powder for injection (10mg)  | \$19.27  | eMIT | \$6.20  | \$1.72   | TN | \$2.57796 | \$4.03626 |
| vincristine                      | powder for injection (5mg)   | \$23.43  | eMIT | \$13.92 | \$0.24   | TN | \$2.66370 | \$4.15039 |
| vincristine                      | powder for injection (1mg)   | \$4.08   | eMIT | \$2.78  | \$0.05   | TN | \$0.53274 | \$1.31408 |
| vinorelbine                      | 1mL vial (10mg)              | \$6.23   | eMIT | \$6.76  | \$36.79  | P  |           |           |
| vinorelbine                      | 5mL vial (50mg)              | \$23.41  | eMIT | \$33.61 | \$152.63 | P  |           |           |
| zidovudine (ZDV or AZT)          | 20mL vial (200mg)            | \$11.60  | BNF  |         | \$0.20   | P  | \$0.05046 | \$0.67216 |

eMIT – price source was the electronic market information tool, available from <https://www.gov.uk/government/publications/drugs-and-pharmaceutical-electronic-market-information-emit>

BNF – price source was the British National Formulary, available from <https://bnf.nice.org.uk/>

TN – price source was the database of the Tamil Nadu Medical Services Corporation, available from [http://www.tnmsc.com/tnmsc/new/user\\_pages/drugtender.php?drugcat=drug2017](http://www.tnmsc.com/tnmsc/new/user_pages/drugtender.php?drugcat=drug2017) and [http://www.tnmsc.com/tnmsc/new/user\\_pages/drugtender.php?drugcat=sdg2017](http://www.tnmsc.com/tnmsc/new/user_pages/drugtender.php?drugcat=sdg2017)

P – price source was the MedGuide India database, available from <http://www.medguideindia.com/>

Prices in South Africa were collected from the South Africa Department of Health Master Procurement Catalogue. Available from <http://www.health.gov.za/index.php/component/phocadownload/category/196> (accessed May 12, 2017).

### Exchange rates

Exchange rates used were 1 INR = 0.015 USD, 1 GBP = 1.3 USD, 1 ZAR = 0.075 USD.

For peer review only

| Section/item                    | Item No | Recommendation                                                                                                                                                                             | Reported on page No/ line No                                                                                                 |
|---------------------------------|---------|--------------------------------------------------------------------------------------------------------------------------------------------------------------------------------------------|------------------------------------------------------------------------------------------------------------------------------|
| <b>Title and abstract</b>       |         |                                                                                                                                                                                            |                                                                                                                              |
| Title                           | 1       | Identify the study as an economic evaluation or use more specific terms such as “cost-effectiveness analysis”, and describe the interventions compared.                                    | Page 1, lines 1-2                                                                                                            |
| Abstract                        | 2       | Provide a structured summary of objectives, perspective, setting, methods (including study design and inputs), results (including base case and uncertainty analyses), and conclusions.    | Page 2, lines 1-27                                                                                                           |
| <b>Introduction</b>             |         |                                                                                                                                                                                            |                                                                                                                              |
| Background and objectives       | 3       | Provide an explicit statement of the broader context for the study.                                                                                                                        | Page 4, lines 3-8                                                                                                            |
|                                 |         | Present the study question and its relevance for health policy or practice decisions.                                                                                                      | Page 4, lines 24-29                                                                                                          |
| <b>Methods</b>                  |         |                                                                                                                                                                                            |                                                                                                                              |
| Target population and subgroups | 4       | Describe characteristics of the base case population and subgroups analysed, including why they were chosen.                                                                               | Page 5, lines 3-38                                                                                                           |
| Setting and location            | 5       | State relevant aspects of the system(s) in which the decision(s) need(s) to be made.                                                                                                       | Not applicable                                                                                                               |
| Study perspective               | 6       | Describe the perspective of the study and relate this to the costs being evaluated.                                                                                                        | Not applicable                                                                                                               |
| Comparators                     | 7       | Describe the interventions or strategies being compared and state why they were chosen.                                                                                                    | Not applicable                                                                                                               |
| Time horizon                    | 8       | State the time horizon(s) over which costs and consequences are being evaluated and say why appropriate.                                                                                   | Not applicable, as this is a ‘snapshot’ price estimate and comparison to current prices (one time point: the present moment) |
| Discount rate                   | 9       | Report the choice of discount rate(s) used for costs and outcomes and say why appropriate.                                                                                                 | No discount rate used, as snapshot estimate                                                                                  |
| Choice of health outcomes       | 10      | Describe what outcomes were used as the measure(s) of benefit in the evaluation and their relevance for the type of analysis performed.                                                    | Not applicable                                                                                                               |
| Measurement of effectiveness    | 11a     | <i>Single study-based estimates:</i> Describe fully the design features of the single effectiveness study and why the single study was a sufficient source of clinical effectiveness data. | Not applicable                                                                                                               |

| Section/item                                           | Item No | Recommendation                                                                                                                                                                                                                                                                                                                                        | Reported on page No/ line No                |
|--------------------------------------------------------|---------|-------------------------------------------------------------------------------------------------------------------------------------------------------------------------------------------------------------------------------------------------------------------------------------------------------------------------------------------------------|---------------------------------------------|
|                                                        | 11b     | <i>Synthesis-based estimates:</i> Describe fully the methods used for identification of included studies and synthesis of clinical effectiveness data.                                                                                                                                                                                                | Not applicable                              |
| Measurement and valuation of preference based outcomes | 12      | If applicable, describe the population and methods used to elicit preferences for outcomes.                                                                                                                                                                                                                                                           | Not applicable                              |
| Estimating resources and costs                         | 13a     | <i>Single study-based economic evaluation:</i> Describe approaches used to estimate resource use associated with the alternative interventions. Describe primary or secondary research methods for valuing each resource item in terms of its unit cost. Describe any adjustments made to approximate to opportunity costs.                           | Not applicable                              |
|                                                        | 13b     | <i>Model-based economic evaluation:</i> Describe approaches and data sources used to estimate resource use associated with model health states. Describe primary or secondary research methods for valuing each resource item in terms of its unit cost. Describe any adjustments made to approximate to opportunity costs.                           | Pages 5-8                                   |
| Currency, price date, and conversion                   | 14      | Report the dates of the estimated resource quantities and unit costs. Describe methods for adjusting estimated unit costs to the year of reported costs if necessary. Describe methods for converting costs into a common currency base and the exchange rate.                                                                                        | Page 8, line 6                              |
| Choice of model                                        | 15      | Describe and give reasons for the specific type of decision-analytical model used. Providing a figure to show model structure is strongly recommended.                                                                                                                                                                                                | Not applicable                              |
| Assumptions                                            | 16      | Describe all structural or other assumptions underpinning the decision-analytical model.                                                                                                                                                                                                                                                              | Not applicable                              |
| Analytical methods                                     | 17      | Describe all analytical methods supporting the evaluation. This could include methods for dealing with skewed, missing, or censored data; extrapolation methods; methods for pooling data; approaches to validate or make adjustments (such as half cycle corrections) to a model; and methods for handling population heterogeneity and uncertainty. | Page 5, lines 27-32 and page 6, lines 1-13. |
| <b>Results</b>                                         |         |                                                                                                                                                                                                                                                                                                                                                       |                                             |

| Section/item                                                         | Item No | Recommendation                                                                                                                                                                                                                                                              | Reported on page No/ line No |
|----------------------------------------------------------------------|---------|-----------------------------------------------------------------------------------------------------------------------------------------------------------------------------------------------------------------------------------------------------------------------------|------------------------------|
| Study parameters                                                     | 18      | Report the values, ranges, references, and, if used, probability distributions for all parameters. Report reasons or sources for distributions used to represent uncertainty where appropriate. Providing a table to show the input values is strongly recommended.         | Not applicable.              |
| Incremental costs and outcomes                                       | 19      | For each intervention, report mean values for the main categories of estimated costs and outcomes of interest, as well as mean differences between the comparator groups. If applicable, report incremental cost-effectiveness ratios.                                      | Not applicable               |
| Characterising uncertainty                                           | 20a     | <i>Single study-based economic evaluation:</i> Describe the effects of sampling uncertainty for the estimated incremental cost and incremental effectiveness parameters, together with the impact of methodological assumptions (such as discount rate, study perspective). | Not applicable               |
|                                                                      | 20b     | <i>Model-based economic evaluation:</i> Describe the effects on the results of uncertainty for all input parameters, and uncertainty related to the structure of the model and assumptions.                                                                                 | Not applicable               |
| Characterising heterogeneity                                         | 21      | If applicable, report differences in costs, outcomes, or cost-effectiveness that can be explained by variations between subgroups of patients with different baseline characteristics or other observed variability in effects that are not reducible by more information.  | Not applicable               |
| <b>Discussion</b>                                                    |         |                                                                                                                                                                                                                                                                             |                              |
| Study findings, limitations, generalisability, and current knowledge | 22      | Summarise key study findings and describe how they support the conclusions reached. Discuss limitations and the generalisability of the findings and how the findings fit with current knowledge.                                                                           | Pages 10-13                  |
| <b>Other</b>                                                         |         |                                                                                                                                                                                                                                                                             |                              |
| Source of funding                                                    | 23      | Describe how the study was funded and the role of the funder in the identification, design, conduct, and reporting of the analysis. Describe other non-monetary sources of support.                                                                                         | Page 14, lines 3-4           |
| Conflicts of interest                                                | 24      | Describe any potential for conflict of interest of study contributors in accordance                                                                                                                                                                                         | Page 14, lines 8-11          |

| Section/item | Item No | Recommendation                                                                                                                                                | Reported on page No/ line No |
|--------------|---------|---------------------------------------------------------------------------------------------------------------------------------------------------------------|------------------------------|
|              |         | with journal policy. In the absence of a journal policy, we recommend authors comply with International Committee of Medical Journal Editors recommendations. |                              |

For peer review only
