# Supplementary material for: Estimation of cost-based prices for injectable medicines in the WHO Essential Medicines List
Source: PubMed Central journal article supplement — BMJ Open. 2019 Sep 30;9(9):e027780. doi: 10.1136/bmjopen-2018-027780 (PMC6773329; doi:10.1136/bmjopen-2018-027780), 2019-09-30
Supplement: bmjopen-2018-027780supp001.pdf [file bmjopen-2018-027780supp001.pdf]

## Appendix

**Criteria used for cleaning export data.**

| <b>Reason for censoring</b>                                                     | <b>Example of product description that would trigger censoring</b>                                                                                                                                          |
|---------------------------------------------------------------------------------|-------------------------------------------------------------------------------------------------------------------------------------------------------------------------------------------------------------|
| Incorrect substance identified                                                  | “DIAMORPHINE” (in a search for “morphine”)                                                                                                                                                                  |
| Item is part of a mix of products                                               | “ABACAVIR, LOPINAVIR, LAMIVUDINE API”                                                                                                                                                                       |
| Quantity of shipment < 1.0 kg, with exceptions made for very low-dose medicines | Value listed in “quantity” variable greater than 1.0kg                                                                                                                                                      |
| Finished Pharmaceutical Product (FPP), for example tablets                      | “ABACAVIR SULFATE TABLETS 600MG”                                                                                                                                                                            |
| Impurity                                                                        | “ABACAVIR SULPHATE IMPURITY”                                                                                                                                                                                |
| Unclear quantity of API                                                         | “ABACAVIR GRANULES 10%”<br>(In this example, the percentage descriptor could refer to a variety of parameters, for example, moisture content. As this is not specified, the true amount of API is unknown.) |
| Free sample or ‘no commercial value’                                            | “ABACAVIR SULPHATE FREE SAMPLE”<br>“ABACAVIR SULPHATE N.C.V.”                                                                                                                                               |
| For veterinary use                                                              | “IVERMECTIN VETERINARY”                                                                                                                                                                                     |
| Reference/working standard                                                      | “ABACAVIR WORKING STANDARD”                                                                                                                                                                                 |

This table is reproduced from an earlier publication as this element of the methodology was identical:

Hill A, Barber MJ, Gotham D. Estimated costs of production and potential prices for the WHO Essential Medicines List. *BMJ Global Health* 2018; e000571.

**Included and excluded formulation types, by terms used in WHO Model List of Essential Medicines.**

|                                                                                                                                                                                                                                                                                                                                                                                                                                                                                                                                                                                                                                                                                                                                                                                                                                                                                                                                                                                                                                                                                                                                                                                                                                           |
|-------------------------------------------------------------------------------------------------------------------------------------------------------------------------------------------------------------------------------------------------------------------------------------------------------------------------------------------------------------------------------------------------------------------------------------------------------------------------------------------------------------------------------------------------------------------------------------------------------------------------------------------------------------------------------------------------------------------------------------------------------------------------------------------------------------------------------------------------------------------------------------------------------------------------------------------------------------------------------------------------------------------------------------------------------------------------------------------------------------------------------------------------------------------------------------------------------------------------------------------|
| <b>Included:</b>                                                                                                                                                                                                                                                                                                                                                                                                                                                                                                                                                                                                                                                                                                                                                                                                                                                                                                                                                                                                                                                                                                                                                                                                                          |
| Concentrate for injection, depot injection, infusion, injectable solution, injection, injection for intravenous administration, injection for spinal anaesthesia, injection in oil, injection: ampoule or pre-filled syringe, injections, oily injection, oily solution, oily suspension for injection, parenteral formulation, powder for injection, solution for injection, solution for intramuscular injection, solution for IV infusion, vial.                                                                                                                                                                                                                                                                                                                                                                                                                                                                                                                                                                                                                                                                                                                                                                                       |
| <b>Excluded:</b>                                                                                                                                                                                                                                                                                                                                                                                                                                                                                                                                                                                                                                                                                                                                                                                                                                                                                                                                                                                                                                                                                                                                                                                                                          |
| Ampoule (for buccal administration when solution for oromucosal administration is not available), aqueous solution*, bag for infusion, capsule, cream, cream (as mupirocin calcium), cream or lotion, cream or ointment, dental cartridge, detergent-based suspension, eye ointment, gel or rectal solution, granules, granules (slow-release; to mix with water), immediate release capsule, inhalation (aerosol), lotion, lozenge, metered dose inhaler (aerosol), nasal spray, ointment, oral liquid, oral powder, pessary, powder for oral administration, powder for oral liquid, pre-filled syringe, rectal dosage form, rectal solution, respirator solution for use in nebulizers, retention enema, saturated solution, solid oral dosage form, solid oral dosage form (controlled-release tablets), solid oral form, solution, solution (eye drops), solution for oromucosal administration, suppository, tablet, tablet (chewable), tablet (crushable), tablet (dispersible, scored), tablet (dispersible), tablet (enteric-coated), tablet (heat stable), tablet (immediate release), tablet (scored), tablet (slow release), tablet (sublingual), topical, topical forms, transdermal patches, vaginal cream, vaginal tablet. |

\*this represents potassium permanganate for topical use in dermatology.

**Figure A1. Example of API data: Price of linezolid API exported from India from July 1, 2014 to July 1, 2016.**

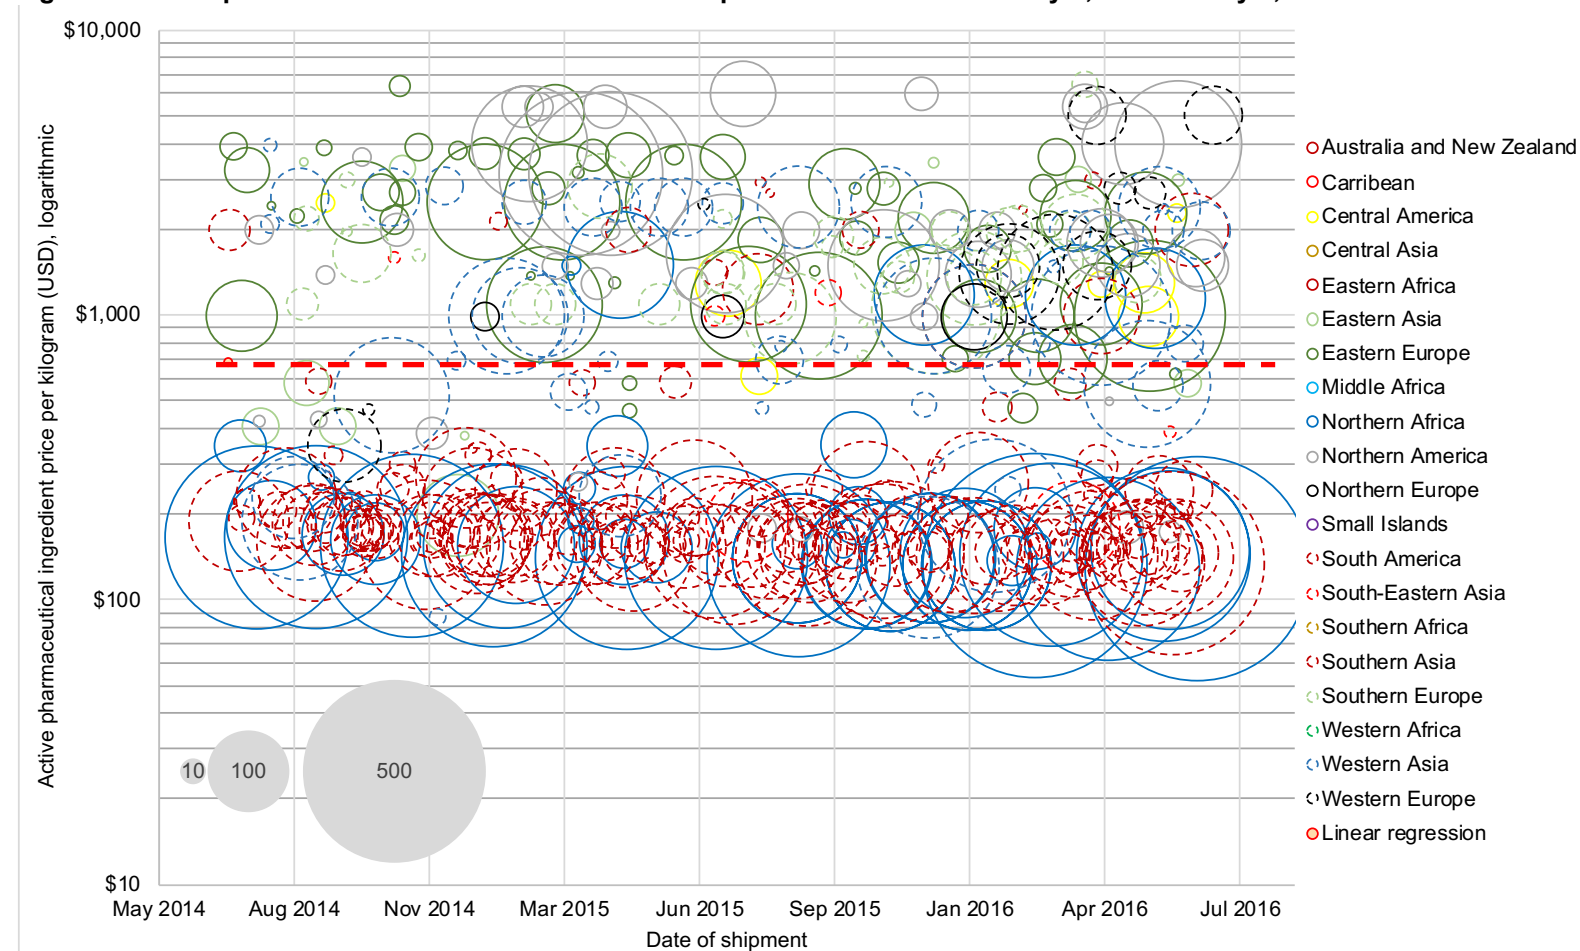

Bubble colours correspond to the region of the destination country for individual shipments. Bubble sizes correspond to the size of individual shipments (size key shown in lower-left, in kilograms). The linear regression model is shown as a dashed red line; though it appears horizontal it has a slight upwards slope. The values estimated by the linear regression model were \$683/kg on July 1, 2014, and \$690/kg on July 1, 2016.

### Costs prescribed in India's Drug Price Control Order (2012).

| Item                                           | Cost per unit in 2011 Indian rupees | Converted to 2016 USD |
|------------------------------------------------|-------------------------------------|-----------------------|
| <b>Conversion cost</b>                         |                                     |                       |
| <i>Ampoules</i>                                |                                     |                       |
| Up to 1mL                                      | 0.4253                              | \$0.008               |
| 100mL                                          | 1.4327                              | \$0.028               |
| <i>Sterile vials</i>                           |                                     |                       |
| Up to 5mL                                      | 1.22                                | \$0.024               |
| 100mL                                          | 3.21                                | \$0.063               |
| <b>Packing materials cost</b>                  |                                     |                       |
| <i>USP type I glass vial including blister</i> |                                     |                       |
| Up to 2mL                                      | 1.48                                | \$0.029               |
| 100mL                                          | 6.96                                | \$0.136               |
| <i>Plastic vial/bottle</i>                     |                                     |                       |
| Up to 2mL                                      | 0.99                                | \$0.019               |
| 100mL                                          | 2.96                                | \$0.058               |
| <i>Ampoules</i>                                |                                     |                       |
| <i>White ampoule in tray</i>                   |                                     |                       |
| Up to 1mL                                      | 0.53                                | \$0.010               |
| 25mL                                           | 2.86                                | \$0.056               |
| <i>Amber ampoules in blister</i>               |                                     |                       |
| Up to 1mL                                      | 0.63                                | \$0.012               |
| 25mL                                           | 4.68                                | \$0.091               |
| <b>Packing charges</b>                         |                                     |                       |
| <i>Ampoules</i>                                |                                     |                       |
| Up to 5mL                                      | 0.33                                | \$0.006               |
| Over 15mL                                      | 0.56                                | \$0.011               |
| <i>Liquid in vials</i>                         |                                     |                       |
| Up to 5mL                                      | 0.6                                 | \$0.012               |
| Over 5mL                                       | 0.69                                | \$0.013               |
| <i>Sterile powder in vials</i>                 |                                     |                       |
| Up to 1g                                       | 0.23                                | \$0.004               |
| Over 1g                                        | 0.38                                | \$0.007               |
| <b>Ampoules range</b>                          |                                     | <b>\$0.03–\$0.13</b>  |
| <b>Vials range</b>                             |                                     | <b>\$0.05–\$0.21</b>  |

Pharmabiz.com. NPPA notification dated Dec 27, 2012 fixing/revising the norms for conversion cost (CC), packing charges (PC), process loss (PL) and packing material. Available from: <http://pharmabiz.com/PrintArticle.aspx?aid=72988> (accessed 6 November 2018).

Rupee values were inflation-adjusted by a factor of 1.30, based on inflation data provided by the World Bank, available from <https://data.worldbank.org/indicator/FP.CPI.TOTL.ZG?locations=IN>.

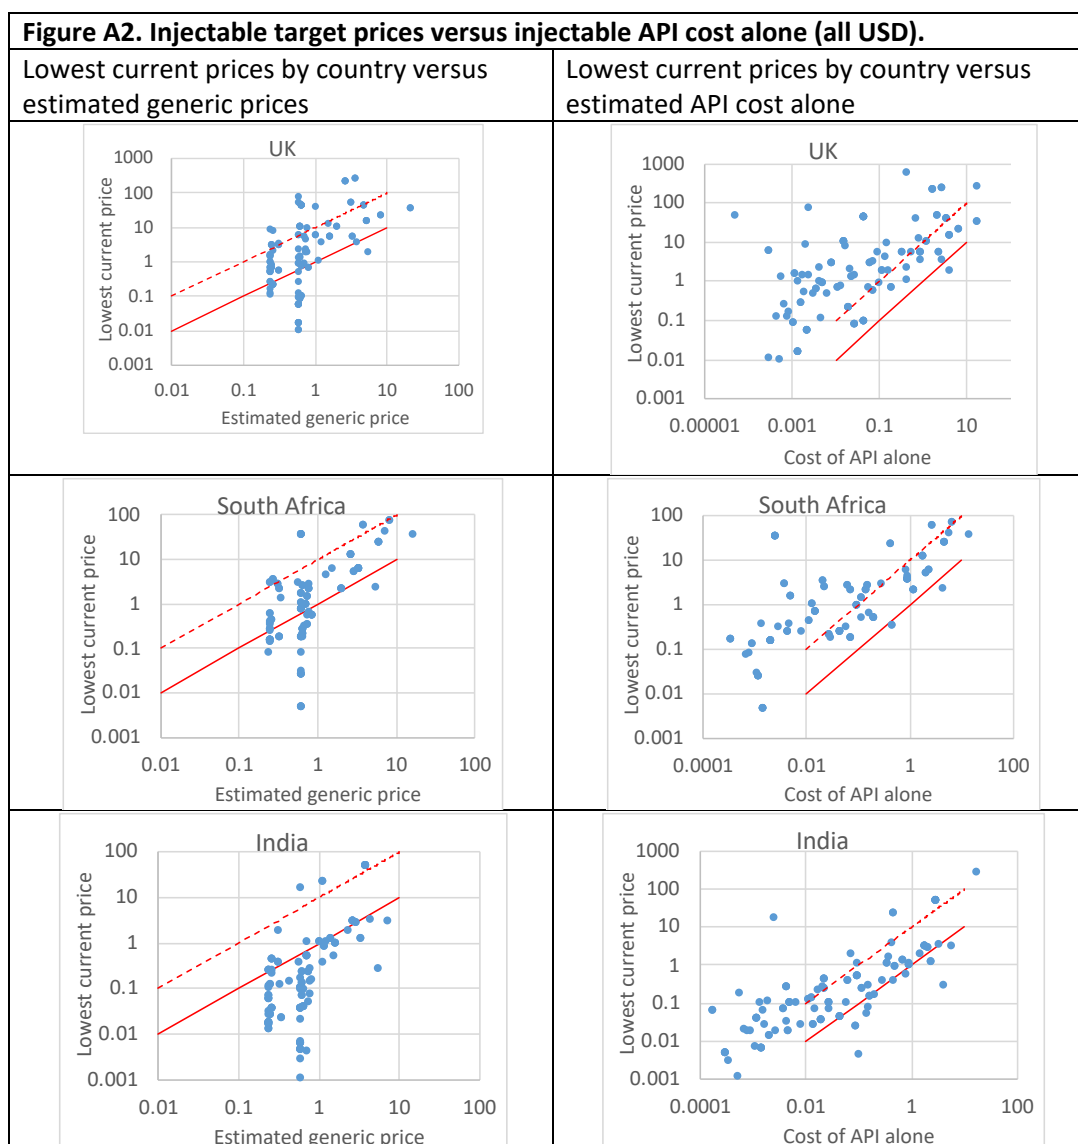

*Solid red line: Points above this line represent an instance where the lowest current price is greater than the estimated generic price/API cost.*

*Dashed red line: Points above this line represent an instance where the lowest current price is more than 10 times the estimated generic price/API cost.*

'Floors' can be seen for estimated generic price at \$0.24 and \$0.61 – the cost-based prices estimated by our algorithm for ampoules and vials, respectively, if API costs are zero, therefore, the estimated cost-based price cannot be below these 'floors'. In all countries, it can be observed that in some cases (in India more than in South Africa more than in UK) lowest current prices go below these 'floors'.

Ratio of estimated cost-based prices to lowest current prices in the UK, South Africa, and India, by therapeutic category.

| Medicine                                                             | UK   | South Africa | India |
|----------------------------------------------------------------------|------|--------------|-------|
| Specific medicines for neonatal care                                 | 43.4 | 0.8          | 0.1   |
| Cardiovascular medicines                                             | 5.2  | 9.9          | 0.2   |
| Medicines for mental and behavioural disorder                        | 5.7  | 7.1          | 0.1   |
| Hormones, other endocrine medicines and contraceptives               | 4.5  | 0.8          | 2.8   |
| Anticonvulsants/antiepileptics                                       | 2.8  | 3.7          | 0.3   |
| Antineoplastics and immunosuppressives                               | 3.0  | 2.7          | 0.7   |
| Oxytocics and antioxytocics                                          | 3.7  | 1.3          | 0.4   |
| Antidotes and other substances used in poisonings                    | 2.5  | 1.4          | 0.4   |
| Anti-infectives                                                      | 2.0  | 1.4          | 0.3   |
| Gastrointestinal medicines                                           | 1.3  | 1.0          | 0.1   |
| Muscle relaxants (peripherally-acting) and cholinesterase inhibitors | 1.6  | 0.5          | 0.1   |
| Antiallergics and medicines used in anaphylaxis                      | 0.7  | 0.9          | 0.1   |
| Medicines acting on the respiratory tract                            | 0.7  | NA           | 0.1   |
| Medicines affecting the blood                                        | 0.6  | 0.5          | 0.1   |
| Medicines for pain and palliative care                               | 0.6  | 0.5          | 0.1   |
| Anaesthetics                                                         | 0.2  | 0.2          | 0.1   |
| Diuretics                                                            | 0.3  | 0.1          | 0.0   |
| Antimigraine medicines                                               | NA   | NA           | NA    |
| Antiparkinsonism Medicines                                           | NA   | NA           | NA    |
| Dermatological Medicines (topical)                                   | NA   | NA           | NA    |
| Ophthalmological Preparations                                        | NA   | NA           | NA    |
| Ear, nose and throat medicines (children)                            | NA   | NA           | NA    |
| Medicines for diseases of joints                                     | NA   | NA           | NA    |

Table is ranked by highest to lowest mean ratio across the three countries.

**Full results table: Lowest current prices in the UK, South Africa, and India, and estimated cost-based generic prices.**

| Medicine                    | Unit                                                      | UK price (USD) | UK price source | South Africa price (USD) | India price (USD) | India price source | Cost of API per unit | Estimated cost-based product price per unit |
|-----------------------------|-----------------------------------------------------------|----------------|-----------------|--------------------------|-------------------|--------------------|----------------------|---------------------------------------------|
| acetylcysteine              | 2000mg ampoule                                            | \$1.36         | eMIT            | \$1.57                   | \$2.00            | TN                 |                      |                                             |
| aciclovir                   | powder for injection (250mg)                              | \$1.24         | eMIT            | \$2.10                   | \$0.23            | TN                 | \$0.02215            | \$0.63448                                   |
| amikacin                    | powder for injection (1000mg)                             | \$23.83        | eMIT            | \$0.55                   | \$0.27            | TN                 |                      |                                             |
| amikacin                    | powder for injection (100mg)                              | \$2.38         | eMIT            | \$0.33                   | \$0.05            | TN                 |                      |                                             |
| amikacin                    | powder for injection (500mg)                              | \$11.92        | eMIT            | \$0.28                   | \$0.14            | TN                 |                      |                                             |
| amiodarone                  | ampoule (150mg/3mL)                                       | \$1.95         | BNF             | \$2.87                   | \$0.24            | TN                 | \$0.02024            | \$0.26893                                   |
| amphotericin B              | powder for injection (50mg)                               | \$5.04         | BNF             |                          | \$1.02            | TN                 | \$0.09296            | \$0.72872                                   |
| ampicillin                  | powder for injection (1000mg)                             | \$20.36        | BNF             | \$1.21                   | \$0.13            | TN                 | \$0.02941            | \$0.64415                                   |
| ampicillin                  | powder for injection (500mg)                              | \$10.18        | BNF             | \$0.61                   | \$0.06            | TN                 | \$0.01471            | \$0.62457                                   |
| artemether                  | ampoule (80mg/1mL)                                        |                |                 |                          | \$0.40            | P                  | \$0.02194            | \$0.27120                                   |
| artesunate                  | artesunate ampoule (60mg) & 5% sodium bicarbonate ampoule |                |                 |                          |                   |                    |                      |                                             |
| asparaginase                | powder for injection (10,000iU)                           | \$796.90       | BNF             |                          | \$11.57           | TN                 |                      |                                             |
| atracurium                  | 1mL injection (10mg)                                      | \$0.86         | BNF             |                          | \$0.00            | TN                 | \$0.09646            | \$0.73339                                   |
| atropine                    | 1mL ampoule (1mg)                                         | \$8.25         | BNF             | \$0.13                   | \$0.01            | TN                 | \$0.00198            | \$0.24464                                   |
| azathioprine                | powder for injection (100mg)                              | \$39.99        | BNF             |                          |                   |                    | \$0.04225            | \$0.66124                                   |
| bendamustine                | 2mL injection (180mg)                                     |                |                 |                          | \$185.14          | P                  | \$10.85220           | \$15.04928                                  |
| bendamustine                | 0.5mL injection (45mg)                                    |                |                 |                          | \$46.29           | P                  | \$2.71305            | \$4.21607                                   |
| benzathine benzylpenicillin | 5mL vial (1.44g)                                          |                |                 |                          | \$0.23            | P                  |                      |                                             |
| benzathine benzylpenicillin | 5mL vial (900mg)                                          |                |                 |                          | \$0.17            | P                  |                      |                                             |
| benzylpenicillin            | powder for injection (3g)                                 | \$15.18        | BNF             |                          | \$0.49            | TN                 |                      |                                             |
| benzylpenicillin            | powder for injection (600mg)                              | \$3.04         | BNF             |                          | \$0.10            | TN                 |                      |                                             |
| bevacizumab                 | 1mL injection (25mg)                                      | \$78.86        | BNF             |                          | \$63.57           | TN                 |                      |                                             |
| biperiden                   | 1ml ampoule (5mg)                                         |                |                 |                          |                   |                    |                      |                                             |
| bleomycin                   | powder for injection (15mg)                               | \$24.78        | BNF             |                          | \$4.60            | TN                 |                      |                                             |
| bupivacaine                 | 1mL injection (2.5mg)                                     | \$0.11         | eMIT            |                          | \$0.02            | P                  | \$0.00051            | \$0.60568                                   |
| bupivacaine                 | 4mL ampoule (20mg, with glucose)                          |                |                 | \$0.21                   | \$0.23            | P                  | \$0.00411            | \$0.24747                                   |
| bupivacaine                 | 1mL injection (5mg)                                       | \$0.09         | eMIT            | \$0.02                   | \$0.01            | TN                 | \$0.00103            | \$0.60637                                   |
| caffeine citrate            | 1mL injection (20mg)                                      | \$5.70         | eMIT            |                          |                   |                    | \$0.00030            | \$0.60540                                   |
| calcium folinate            | 10mL ampoule (30mg)                                       | \$6.01         | BNF             |                          | \$1.87            | P                  |                      |                                             |
| calcium gluconate           | 10mL ampoule (1000mg)                                     | \$0.65         | eMIT            | \$0.36                   | \$0.11            | P                  | \$0.01106            | \$0.25672                                   |
| capreomycin                 | powder for injection (1000mg)                             | \$37.19        | BNF             | \$7.16                   | \$3.93            | P                  |                      |                                             |
| carboplatin                 | 60mL injection (600mg)                                    | \$32.83        | eMIT            | \$45.76                  | \$22.80           | TN                 | \$17.23615           | \$23.54631                                  |
| carboplatin                 | 15mL injection (150mg)                                    | \$9.91         | eMIT            | \$11.44                  | \$5.70            | TN                 | \$4.30904            | \$6.34033                                   |



|                  |                                 |          |      |         |         |    |            |            |
|------------------|---------------------------------|----------|------|---------|---------|----|------------|------------|
| carboplatin      | 45mL injection (450mg)          | \$24.78  | eMIT | \$30.01 | \$15.81 | TN | \$12.92711 | \$17.81099 |
| carboplatin      | 5mL injection (50mg)            | \$4.64   | eMIT | \$3.81  | \$1.76  | TN | \$1.43635  | \$2.51678  |
| cefazolin        | powder for injection (1000mg)   |          |      | \$0.53  | \$0.26  | TN | \$0.15187  | \$0.80714  |
| cefotaxime       | powder for injection (250mg)    | \$1.31   | eMIT | \$0.15  | \$0.06  | TN | \$0.02734  | \$0.64139  |
| ceftazidime      | powder for injection (1000mg)   | \$0.99   | eMIT | \$1.77  | \$0.36  | P  | \$0.43097  | \$1.17863  |
| ceftazidime      | powder for injection (250mg)    | \$1.77   | eMIT | \$0.44  | \$0.36  | P  | \$0.10774  | \$0.74841  |
| ceftriaxone      | powder for injection (1000mg)   | \$0.64   | eMIT | \$0.44  | \$0.15  | TN | \$0.19035  | \$0.85836  |
| ceftriaxone      | powder for injection (250mg)    | \$1.43   | eMIT | \$0.27  | \$0.08  | TN | \$0.04759  | \$0.66834  |
| chloramphenicol  | 2mL ampoule (1000mg)            |          |      |         | \$0.14  | P  | \$0.15906  | \$0.45370  |
| chloramphenicol  | powder for injection (1000mg)   | \$1.81   | BNF  |         | \$0.14  | P  | \$0.15906  | \$0.81670  |
| chlorpromazine   | 2mL ampoule (50mg)              | \$0.92   | eMIT |         | \$0.03  | P  | \$0.00429  | \$0.24772  |
| chlorpromazine   | 2mL ampoule (50mg)              | \$0.92   | eMIT |         | \$0.03  | P  | \$0.00429  | \$0.24772  |
| ciclosporin      | 1mL ampoule (50mg)              | \$3.02   | BNF  | \$1.72  | \$1.71  | P  | \$0.06771  | \$0.33212  |
| ciprofloxacin    | 1mL solution for infusion (2mg) | \$0.01   | eMIT |         | \$0.00  | TN | \$0.00051  | \$0.60568  |
| cisplatin        | 100mL injection (100mg)         | \$13.73  | eMIT | \$8.84  | \$5.14  | P  | \$3.88629  | \$5.77765  |
| cisplatin        | 50mL injection (50mg)           | \$9.09   | eMIT | \$4.42  | \$2.57  | P  | \$1.94314  | \$3.19133  |
| clindamycin      | 1mL injection (150mg)           | \$0.37   | eMIT |         | \$1.21  | P  |            |            |
| cloxacillin      | powder for injection (500mg)    |          |      | \$0.89  | \$0.12  | TN | \$0.01268  | \$0.62188  |
| cyclizine        | 1mL injection (50mg)            | \$2.11   | eMIT |         |         |    | \$0.00419  | \$0.61057  |
| cyclophosphamide | powder for injection (500mg)    | \$11.53  | eMIT | \$5.04  | \$0.50  | TN | \$0.78130  | \$1.64490  |
| cytarabine       | powder for injection (100mg)    | \$3.99   | eMIT | \$1.80  | \$0.05  | TN | \$0.13341  | \$0.78257  |
| dacarbazine      | powder for injection (100mg)    | \$5.42   | eMIT |         | \$1.01  | TN | \$0.33923  | \$1.05652  |
| dactinomycin     | powder for injection (500mcg)   |          |      |         | \$5.87  | P  |            |            |
| daunorubicin     | powder for injection (50mg)     | \$211.25 | BNF  | \$10.03 | \$2.78  | TN | \$1.70665  | \$2.87655  |
| deferoxamine     | injection (500mg)               | \$5.19   | BNF  | \$0.47  | \$2.12  | TN |            |            |
| deferoxamine     | powder for injection (500mg)    | \$5.19   | BNF  | \$0.47  | \$2.12  | TN |            |            |
| desmopressin     | 1mL ampoule (4mcg)              | \$1.46   | eMIT |         |         |    | \$0.00112  | \$0.24349  |
| dexamethasone    | 1mL ampoule (4mg)               |          |      | \$0.21  | \$0.02  | TN | \$0.00790  | \$0.25252  |
| dexamethasone    | 1mL ampoule (4mg)               |          |      | \$0.21  | \$0.02  | TN | \$0.00790  | \$0.25252  |
| dexamethasone    | 1mL ampoule (4mg)               |          |      | \$0.21  | \$0.02  | TN | \$0.00790  | \$0.25252  |
| dexamethasone    | 1mL ampoule (4mg)               |          |      | \$0.21  | \$0.02  | TN | \$0.00790  | \$0.25252  |
| dexamethasone    | 1mL ampoule (4mg)               |          |      | \$0.21  | \$0.02  | TN | \$0.00790  | \$0.25252  |
| diazepam         | 1mL injection (5mg)             | \$0.25   | eMIT | \$0.06  | \$0.02  | TN | \$0.00065  | \$0.60587  |
| digoxin          | 2mL ampoule (500mcg)            | \$0.60   | eMIT | \$2.44  | \$0.06  | P  | \$0.00354  | \$0.24671  |
| dimercaprol      | 2mL ampoule (100mg)             |          |      |         | \$1.50  | P  |            |            |
| docetaxel        | injection (20mg)                | \$3.30   | eMIT | \$21.70 | \$1.45  | TN | \$2.71104  | \$4.21340  |
| docetaxel        | injection (40mg)                |          |      | \$34.29 | \$2.90  | TN | \$5.42209  | \$7.82180  |
| dopamine         | 5mL vial (200mg)                | \$0.68   | eMIT | \$0.26  | \$0.09  | TN | \$0.05528  | \$0.67858  |
| doxorubicin      | powder for injection (10mg)     | \$1.99   | eMIT | \$1.70  | \$0.50  | TN | \$0.45249  | \$1.20727  |
| doxorubicin      | powder for injection (50mg)     | \$5.25   | eMIT | \$5.06  | \$1.13  | TN | \$2.26247  | \$3.61635  |
| eflornithine     | 100mL injection (20g)           |          |      |         |         |    | \$27.83990 | \$37.65990 |
| ephedrine        | 1mL ampoule (30mg)              | \$0.52   | eMIT |         | \$0.10  | TN | \$0.00184  | \$0.24445  |

|                                                   |                              |          |      |         |         |    |            |            |
|---------------------------------------------------|------------------------------|----------|------|---------|---------|----|------------|------------|
| epinephrine (adrenaline)                          | 10mL ampoule (1mg)           | \$6.97   | eMIT |         |         |    | \$0.01878  | \$0.26699  |
| epinephrine (adrenaline)                          | 1mL ampoule (1mg)            | \$0.20   | eMIT |         | \$0.03  | TN | \$0.01878  | \$0.26699  |
| epinephrine (adrenaline)                          | 1mL ampoule (1mg)            | \$0.20   | eMIT |         | \$0.03  | TN | \$0.01878  | \$0.26699  |
| ergometrine                                       | 1ml ampoule (0.2mg)          |          |      |         | \$0.03  | P  |            |            |
| erythromycin                                      | powder for injection (500mg) | \$11.12  | eMIT |         |         |    |            |            |
| estradiol cypionate + medroxyprogesterone acetate | injection (5mg + 25mg)       |          |      |         |         |    |            |            |
| etoposide                                         | 5mL ampoule (100mg)          | \$3.47   | eMIT | \$3.66  | \$0.97  | TN | \$0.84629  | \$1.36841  |
| filgrastim                                        | 1.6mL vial (480mcg)          |          |      |         |         |    | \$0.00392  | \$0.61022  |
| filgrastim                                        | 1mL vial (300mcg)            | \$68.52  | BNF  | \$28.15 | \$15.71 | P  | \$0.00245  | \$0.60826  |
| fluconazole                                       | 1mL vial (2mg)               | \$0.01   | eMIT |         | \$0.00  | TN | \$0.00028  | \$0.60538  |
| flucytosine                                       | 250mL infusion (2.5g)        | \$39.43  | BNF  |         |         |    | \$3.44262  | \$5.18712  |
| fludarabine                                       | vial (50mg)                  | \$30.46  | eMIT | \$42.03 | \$20.50 | TN |            |            |
| fluorouracil                                      | 5mL ampoule (250mg)          | \$0.60   | eMIT |         | \$0.10  | P  |            |            |
| fluphenazine                                      | 1mL ampoule (25mg)           | \$2.78   | eMIT | \$2.30  | \$0.34  | P  | \$0.05980  | \$0.32160  |
| fomepizole                                        | 1.5mL ampoule (1500mg)       |          |      |         |         |    | \$26.92838 | \$36.08368 |
| furosemide                                        | 2mL ampoule (20mg)           | \$0.12   | eMIT | \$0.07  | \$0.02  | TN | \$0.00075  | \$0.24300  |
| furosemide                                        | 2mL ampoule (20mg)           | \$0.12   | eMIT | \$0.07  | \$0.02  | TN | \$0.00075  | \$0.24300  |
| gemcitabine                                       | vial (1000mg)                | \$40.16  | eMIT | \$20.20 | \$4.71  | TN | \$4.36964  | \$6.42099  |
| gemcitabine                                       | vial (200mg)                 | \$5.19   | eMIT | \$5.02  | \$0.94  | TN | \$0.87393  | \$1.76820  |
| gentamicin                                        | 2mL vial (20mg)              | \$1.43   | eMIT |         | \$0.04  | P  |            |            |
| gentamicin                                        | 2mL vial (80mg)              | \$0.78   | eMIT | \$0.23  | \$0.04  | TN |            |            |
| glucagon                                          | 1mL injection (1mg)          | \$14.98  | BNF  | \$19.51 | \$1.64  | P  |            |            |
| haloperidol                                       | 1mL ampoule (5mg)            | \$1.40   | eMIT |         | \$0.02  | TN | \$0.00166  | \$0.24420  |
| haloperidol                                       | 1mL ampoule (5mg)            | \$1.40   | eMIT |         | \$0.02  | TN | \$0.00166  | \$0.24420  |
| haloperidol                                       | 1mL ampoule (5mg)            | \$1.40   | eMIT |         | \$0.02  | TN | \$0.00166  | \$0.24420  |
| heparin sodium                                    | 1mL ampoule (133.3mg)        |          |      |         |         |    | \$1.69772  | \$2.50167  |
| heparin sodium                                    | 1mL ampoule (6.7mg)          | \$0.99   | eMIT | \$0.17  | \$0.02  | P  | \$0.08533  | \$0.35558  |
| heparin sodium                                    | 1mL ampoule (6.7mg)          | \$0.99   | eMIT | \$0.17  | \$0.02  | P  | \$0.08533  | \$0.35558  |
| heparin sodium                                    | 1mL ampoule (33.3mg)         | \$2.09   | eMIT | \$0.28  | \$0.14  | TN | \$0.42411  | \$0.80649  |
| heparin sodium                                    | 1mL ampoule (33.3mg)         | \$2.09   | eMIT | \$0.28  | \$0.14  | TN | \$0.42411  | \$0.80649  |
| hydralazine                                       | powder for injection (20mg)  | \$2.88   | BNF  |         |         |    | \$0.00777  | \$0.25234  |
| hydrocortisone                                    | powder for injection (100mg) |          |      | \$0.78  | \$0.48  | P  | \$0.09166  | \$0.72700  |
| hydrocortisone                                    | powder for injection (100mg) |          |      | \$0.78  | \$0.48  | P  | \$0.09166  | \$0.72700  |
| hydroxocobalamin                                  | 1mL ampoule (1mg)            | \$1.15   | eMIT |         |         |    |            |            |
| hyoscine hydrobromide                             | injection (600mcg)           | \$1.33   | eMIT |         |         |    | \$0.00239  | \$0.24518  |
| hyoscine hydrobromide                             | injection (400mcg)           | \$1.10   | eMIT |         |         |    | \$0.00159  | \$0.24412  |
| ibuprofen                                         | 1mL injection (5mg)          | \$46.80  | BNF  |         |         |    | \$0.00005  | \$0.60507  |
| ifosfamide                                        | powder for injection (1g)    | \$118.72 | BNF  | \$28.71 | \$2.33  | TN | \$1.31204  | \$2.35133  |
| ifosfamide                                        | powder for injection (2g)    | \$233.84 | BNF  | \$48.71 | \$4.65  | TN | \$2.62408  | \$4.09765  |

|                                      |                                         |          |      |         |          |    |           |           |
|--------------------------------------|-----------------------------------------|----------|------|---------|----------|----|-----------|-----------|
| ifosfamide                           | powder for injection (500mg)            | \$59.35  | BNF  | \$17.22 | \$1.16   | TN | \$0.65602 | \$1.47816 |
| imipenem + cilastatin                | powder for injection (500mg + 500mg)    | \$3.30   | eMIT | \$3.12  | \$11.86  | P  |           |           |
| imipenem + cilastatin                | powder for injection (250mg + 250mg)    |          |      | \$1.56  | \$8.50   | P  |           |           |
| insulin injection (soluble)          | 10mL injection (13.9mg)                 |          |      |         | \$0.79   | TN | \$0.46524 | \$1.22423 |
| insulin injection (soluble)          | 10mL injection (34.7mg)                 | \$9.72   | BNF  | \$1.83  | \$5.80   | P  | \$1.16309 | \$2.15308 |
| intermediate-acting insulin          | 10mL injection (13.9mg)                 |          |      |         | \$0.79   | TN |           |           |
| intermediate-acting insulin          | 10mL injection (34.7mg)                 | \$9.72   | BNF  | \$1.83  | \$4.19   | P  |           |           |
| irinotecan                           | 5mL vial (100mg)                        | \$143.81 | BNF  |         | \$21.43  | P  | \$0.42618 | \$1.17225 |
| irinotecan                           | 25mL vial (500mg)                       | \$46.83  | eMIT |         | \$107.14 | P  | \$2.13090 | \$3.44123 |
| irinotecan                           | 2mL vial (40mg)                         | \$5.58   | eMIT |         | \$10.71  | P  | \$0.17047 | \$0.83190 |
| kanamycin                            | powder for injection (1g)               |          |      |         | \$0.43   | P  |           |           |
| ketamine                             | 10mL vial (500mg)                       | \$9.10   | BNF  | \$2.30  | \$0.07   | P  | \$0.14269 | \$0.79492 |
| lidocaine                            | 2mL ampoule (100mg lidocaine + glucose) |          |      |         | \$0.06   | P  | \$0.00016 | \$0.24222 |
| lidocaine                            | 5mL ampoule (100mg)                     | \$0.26   | eMIT |         | \$0.02   | P  | \$0.00162 | \$0.24416 |
| lidocaine                            | vial (10mg)                             | \$0.05   | BNF  | \$0.40  | \$0.00   | P  | \$0.00016 | \$0.60522 |
| lidocaine                            | vial (20mg)                             | \$0.06   | BNF  | \$0.14  | \$0.00   | P  | \$0.00032 | \$0.60543 |
| lidocaine + epinephrine (adrenaline) | vial (10mg + 0.005mg)                   | \$0.13   | BNF  |         |          |    | \$0.00026 | \$0.60534 |
| lidocaine + epinephrine (adrenaline) | vial (20mg + 0.005mg)                   | \$0.12   | BNF  |         |          |    | \$0.00042 | \$0.60556 |
| lorazepam                            | 1mL ampoule (2mg)                       |          |      |         | \$0.06   | TN | \$0.00147 | \$0.24395 |
| lorazepam                            | 1mL ampoule (4mg)                       | \$0.46   | BNF  |         | \$0.21   | P  | \$0.00294 | \$0.24591 |
| magnesium sulfate                    | 10mL ampoule (5g)                       | \$0.73   | eMIT | \$1.36  | \$0.09   | TN | \$0.01335 | \$0.25978 |
| magnesium sulfate                    | 2mL ampoule (1g)                        | \$0.42   | eMIT | \$0.27  | \$0.02   | TN | \$0.00267 | \$0.24556 |
| mannitol                             | 1mL solution (100mg)                    | \$0.01   | BNF  |         | \$0.00   | P  | \$0.00069 | \$0.60592 |
| mannitol                             | 1mL solution (100mg)                    | \$0.01   | BNF  |         | \$0.00   | P  | \$0.00069 | \$0.60592 |
| mannitol                             | 1mL solution (200mg)                    | \$0.02   | BNF  | \$0.01  | \$0.01   | P  | \$0.00138 | \$0.60683 |
| mannitol                             | 1mL solution (200mg)                    | \$0.02   | BNF  | \$0.00  | \$0.01   | P  | \$0.00138 | \$0.60683 |
| medroxyprogesterone acetate          | 1mL vial (150mg)                        | \$7.81   | BNF  | \$0.42  | \$3.32   | P  |           |           |
| meglumine antimoniate                |                                         | 0        |      |         |          |    |           |           |
| melarsoprol                          | 5mL ampoule (180mg)                     |          |      |         |          |    |           |           |
| melarsoprol                          | 5mL ampoule (180mg)                     |          |      |         |          |    |           |           |
| mesna                                | 10mL ampoule (1000mg)                   | \$38.23  | BNF  |         | \$0.88   | TN | \$0.66591 | \$1.12833 |
| mesna                                | 4mL ampoule (400mg)                     | \$17.43  | BNF  | \$2.40  | \$0.35   | TN | \$0.26636 | \$0.59653 |
| methotrexate                         | powder for injection (50mg)             | \$1.83   | eMIT | \$1.93  | \$0.26   | TN | \$4.04570 | \$5.98983 |
| methylprednisolone                   | 5mL vial (200mg)                        |          |      |         |          |    | \$0.56616 | \$1.35856 |

|                                            |                              |          |      |         |         |    |            |            |
|--------------------------------------------|------------------------------|----------|------|---------|---------|----|------------|------------|
| methylprednisolone                         | 1mL vial (80mg)              |          |      |         | \$0.61  | P  | \$0.22647  | \$0.90643  |
| methylprednisolone                         | 1mL vial (40mg)              | \$1.79   | eMIT | \$1.20  | \$0.22  | P  | \$0.11323  | \$0.75571  |
| methylthioninium chloride (methylene blue) | 10mL ampoule (100mg)         |          |      |         |         |    |            |            |
| metoclopramide                             | 2mL ampoule (10mg)           | \$0.15   | eMIT | \$0.11  | \$0.02  | TN | \$0.00086  | \$0.24315  |
| metoclopramide                             | 2mL ampoule (10mg)           | \$0.15   | eMIT | \$0.11  | \$0.02  | TN | \$0.00086  | \$0.24315  |
| metronidazole                              | 100mL vial (500mg)           | \$0.47   | eMIT |         | \$0.09  | TN | \$0.00616  | \$0.61320  |
| metronidazole                              | 100mL vial (500mg)           | \$0.47   | eMIT |         | \$0.09  | TN | \$0.00616  | \$0.61320  |
| midazolam                                  | 1mL injection (5mg)          | \$0.08   | eMIT | \$0.17  | \$0.09  | P  | \$0.02628  | \$0.63998  |
| midazolam                                  | 1mL injection (1mg)          | \$0.11   | eMIT | \$0.06  | \$0.03  | TN | \$0.00526  | \$0.61200  |
| midazolam                                  | 1mL injection (1mg)          | \$0.11   | eMIT | \$0.06  | \$0.03  | TN | \$0.00526  | \$0.61200  |
| morphine                                   | 1mL ampoule (10mg)           | \$0.16   | eMIT | \$0.13  | \$0.10  | TN |            |            |
| morphine                                   | 1mL ampoule (10mg)           | \$0.16   | eMIT | \$0.13  | \$0.10  | TN |            |            |
| naloxone                                   | 1mL ampoule (400mcg)         | \$0.43   | eMIT | \$0.21  | \$0.99  | TN |            |            |
| neostigmine                                | 1mL ampoule (500mcg)         |          |      | \$0.26  | \$0.02  | TN | \$0.01352  | \$0.25999  |
| neostigmine                                | 1mL ampoule (2.5mg)          | \$0.53   | eMIT | \$0.15  | \$0.32  | P  | \$0.06758  | \$0.33194  |
| norethisterone enantate                    | 1mL ampoule (200mg)          | \$5.27   | BNF  | \$0.72  | \$1.98  | P  |            |            |
| omeprazole                                 | powder for injection (40mg)  | \$1.23   | eMIT |         | \$0.16  | TN | \$0.00055  | \$0.60573  |
| ondansetron                                | 2mL ampoule (4mg)            | \$0.11   | eMIT | \$0.30  | \$0.02  | TN | \$0.00445  | \$0.24792  |
| ondansetron                                | 2mL ampoule (4mg)            | \$0.11   | eMIT | \$0.30  | \$0.02  | TN | \$0.00445  | \$0.24792  |
| oxaliplatin                                | 40mL vial (200mg)            | \$40.30  | eMIT |         |         |    | \$12.77141 | \$17.60375 |
| oxaliplatin                                | 20mL vial (100mg)            | \$20.15  | eMIT | \$59.76 |         |    | \$6.38571  | \$9.10438  |
| oxaliplatin                                | powder for injection (100mg) | \$20.15  | eMIT | \$59.76 | \$6.21  | TN | \$6.38571  | \$9.10438  |
| oxaliplatin                                | powder for injection (50mg)  | \$13.81  | eMIT | \$29.88 | \$3.10  | TN | \$3.19285  | \$4.85469  |
| oxytocin                                   | 1mL ampoule (25mcg)          | \$0.91   | eMIT | \$0.32  | \$0.09  | TN | \$0.00134  | \$0.24378  |
| paclitaxel                                 | powder for injection (1mg)   | \$0.09   | eMIT | \$0.22  | \$0.04  | TN | \$0.04273  | \$0.66188  |
| paromomycin                                | injection (750mg)            |          |      |         |         |    |            |            |
| pegylated interferon alfa (2a or 2b)       | injection (100mcg)           | \$172.80 | BNF  |         | \$48.91 | TN |            |            |
| pegylated interferon alfa (2a or 2b)       | injection (180mcg)           | \$161.72 | BNF  |         | \$46.43 | TN |            |            |
| pegylated interferon alfa (2a or 2b)       | injection (80mcg)            | \$138.24 | BNF  |         | \$39.13 | TN |            |            |
| pentamidine                                | powder for injection (200mg) | \$27.54  | BNF  |         |         |    |            |            |
| phenobarbital                              | 1mL injection (200mg)        | \$7.32   | eMIT |         | \$0.20  | P  | \$0.01656  | \$0.26404  |
| phenytoin                                  | 5mL vial (250mg)             | \$0.85   | eMIT | \$1.34  | \$0.09  | TN | \$0.00475  | \$0.61133  |
| phytomenadione                             | 5mL ampoule (50mg)           | \$2.46   | BNF  |         | \$0.36  | P  |            |            |
| phytomenadione                             | 5mL ampoule (5mg)            |          |      |         |         |    |            |            |

|                                                |                                    |            |      |          |        |    |             |             |
|------------------------------------------------|------------------------------------|------------|------|----------|--------|----|-------------|-------------|
| procaine benzylpenicillin                      | powder for injection (1g)          |            |      |          |        |    |             |             |
| procaine benzylpenicillin                      | powder for injection (3g)          |            |      |          | \$0.49 | P  |             |             |
| propofol                                       | 1mL injection (20mg)               | \$0.05     | eMIT |          | \$0.17 | P  | \$0.00226   | \$0.60800   |
| propofol                                       | 1mL injection (10mg)               | \$0.03     | eMIT | \$0.02   | \$0.03 | TN | \$0.00113   | \$0.60650   |
| prostaglandin E1                               | 1mL solution for injection (0.5mg) |            |      |          |        |    |             |             |
| prostaglandin E2                               | 1mL solution for injection (1mg)   |            |      |          |        |    |             |             |
| protamine sulfate                              | 5mL ampoule (50mg)                 | \$6.44     | BNF  | \$4.08   | \$0.08 | P  |             |             |
| protamine sulfate                              | 5mL ampoule (50mg)                 | \$6.44     | BNF  | \$4.08   | \$0.08 | P  |             |             |
| pyridostigmine                                 | 1mL ampoule (1mg)                  |            |      |          |        |    |             |             |
| quinine                                        | 2mL ampoule (600mg)                |            |      | \$1.10   | \$0.11 | P  | \$0.07719   | \$0.34474   |
| ranitidine                                     | 2mL ampoule (50mg)                 | \$0.48     | eMIT | \$0.49   | \$0.01 | TN | \$0.00105   | \$0.24340   |
| ribavirin                                      | 10mL solution (800mg)              |            |      |          |        |    | \$0.09776   | \$0.73512   |
| ribavirin                                      | 10mL solution (800mg)              |            |      |          |        |    | \$0.09776   | \$0.73512   |
| ribavirin                                      | 10mL solution (1g)                 |            |      |          |        |    | \$0.12220   | \$0.76765   |
| ribavirin                                      | 10mL solution (1g)                 |            |      |          |        |    | \$0.12220   | \$0.76765   |
| rituximab                                      | 50mL vial (500mg)                  | \$1,135.10 | BNF  | \$518.48 |        |    | \$336.88802 | \$449.00296 |
| rituximab                                      | 10mL vial (100mg)                  | \$227.01   | BNF  | \$103.70 |        |    | \$67.37760  | \$90.28459  |
| salbutamol                                     | 5mL ampoule (50mcg)                |            |      |          |        |    | \$0.00001   | \$0.24201   |
| sodium calcium edetate                         | 5mL ampoule (1000mg)               |            |      |          |        |    | \$0.00334   | \$0.24644   |
| sodium nitrite                                 | 10mL ampoule (300mg)               |            |      |          |        |    | \$0.00038   | \$0.24250   |
| sodium nitroprusside                           | powder for injection (50mg)        |            |      |          | \$0.64 | P  | \$0.00784   | \$0.25244   |
| sodium stibogluconate                          | 30mL vial (3g)                     | \$25.91    | BNF  |          |        |    |             |             |
| sodium stibogluconate or meglumine antimoniate | N/A                                |            |      |          |        |    |             |             |
| sodium thiosulfate                             | 50mL ampoule (12500mg)             |            |      |          |        |    | \$0.02574   | \$0.27625   |
| spectinomycin                                  | powder for injection (2g)          |            |      |          | \$2.86 | P  |             |             |
| streptokinase                                  | powder for injection (15.6mg)      | \$101.97   | eMIT | \$223.93 | \$3.65 | P  | \$14.27110  | \$19.59983  |
| streptomycin                                   | powder for injection (1000mg)      |            |      | \$0.29   | \$0.06 | P  |             |             |
| streptomycin                                   | powder for injection (1000mg)      |            |      | \$0.29   | \$0.06 | P  |             |             |
| sulfamethoxazole + trimethoprim                | 5mL ampoule (400mg+80mg)           | \$2.31     | BNF  |          |        |    | \$0.00659   | \$0.25077   |
| sulfamethoxazole + trimethoprim                | 5mL ampoule (400mg+80mg)           | \$2.31     | BNF  |          |        |    | \$0.00659   | \$0.25077   |

|                                  |                              |          |      |         |          |    |           |           |
|----------------------------------|------------------------------|----------|------|---------|----------|----|-----------|-----------|
| sulfamethoxazole + trimethoprim  | 10mL ampoule (800mg+160mg)   | \$4.62   | BNF  |         |          |    | \$0.01317 | \$0.25953 |
| suramin sodium                   | powder for injection (1g)    |          |      |         |          |    |           |           |
| suxamethonium                    |                              | 0        |      |         |          |    | \$0.00000 | \$0.60500 |
| suxamethonium                    | 2mL ampoule (100mg)          | \$0.86   | eMIT |         | \$0.12   | P  | \$0.05053 | \$0.30925 |
| testosterone                     | 1mL ampoule (200mg)          |          |      |         | \$1.34   | P  | \$0.02237 | \$0.27178 |
| tranexamic acid                  | 10mL ampoule (1000mg)        | \$3.90   | BNF  | \$8.47  | \$0.54   | P  | \$0.09442 | \$0.36767 |
| trastuzumab                      | powder for injection (150mg) | \$529.62 | BNF  |         |          |    |           |           |
| trastuzumab                      | powder for injection (440mg) |          |      |         |          |    |           |           |
| trastuzumab                      | powder for injection (60mg)  |          |      |         |          |    |           |           |
| valproic acid (sodium valproate) | 10mL ampoule (1g)            |          |      |         | \$2.86   | P  | \$0.02628 | \$0.27698 |
| valproic acid (sodium valproate) | 4mL ampoule (400mg)          | \$5.09   | eMIT |         | \$1.14   | P  | \$0.01051 | \$0.25599 |
| vancomycin                       | powder for injection (250mg) | \$0.72   | eMIT | \$0.88  | \$0.28   | TN | \$0.22748 | \$0.90777 |
| vecuronium                       | powder for injection (10mg)  | \$4.38   | BNF  |         | \$1.05   | TN |           |           |
| vecuronium                       | powder for injection (10mg)  | \$4.38   | BNF  |         | \$1.05   | TN |           |           |
| verapamil                        | 2mL ampoule (5mg)            | \$1.41   | BNF  |         |          |    | \$0.00039 | \$0.24252 |
| vinblastine                      | powder for injection (10mg)  | \$19.27  | eMIT | \$6.20  | \$1.72   | TN | \$2.57796 | \$4.03626 |
| vincristine                      | powder for injection (5mg)   | \$23.43  | eMIT | \$13.92 | \$0.24   | TN | \$2.66370 | \$4.15039 |
| vincristine                      | powder for injection (1mg)   | \$4.08   | eMIT | \$2.78  | \$0.05   | TN | \$0.53274 | \$1.31408 |
| vinorelbine                      | 1mL vial (10mg)              | \$6.23   | eMIT | \$6.76  | \$36.79  | P  |           |           |
| vinorelbine                      | 5mL vial (50mg)              | \$23.41  | eMIT | \$33.61 | \$152.63 | P  |           |           |
| zidovudine (ZDV or AZT)          | 20mL vial (200mg)            | \$11.60  | BNF  |         | \$0.20   | P  | \$0.05046 | \$0.67216 |

eMIT – price source was the electronic market information tool, available from <https://www.gov.uk/government/publications/drugs-and-pharmaceutical-electronic-market-information-emit>

BNF – price source was the British National Formulary, available from <https://bnf.nice.org.uk/>

TN – price source was the database of the Tamil Nadu Medical Services Corporation, available from [http://www.tnmsc.com/tnmsc/new/user\\_pages/drugtender.php?drugcat=drug2017](http://www.tnmsc.com/tnmsc/new/user_pages/drugtender.php?drugcat=drug2017) and [http://www.tnmsc.com/tnmsc/new/user\\_pages/drugtender.php?drugcat=sdg2017](http://www.tnmsc.com/tnmsc/new/user_pages/drugtender.php?drugcat=sdg2017)

P – price source was the MedGuide India database, available from <http://www.medguideindia.com/>

Prices in South Africa were collected from the South Africa Department of Health Master Procurement Catalogue. Available from <http://www.health.gov.za/index.php/component/phocadownload/category/196> (accessed May 12, 2017).

**Exchange rates**

Exchange rates used were 1 INR = 0.015 USD, 1 GBP = 1.3 USD, 1 ZAR = 0.075 USD.
